# Supplementary material for: BF3·OEt2 catalyzed synthesis of functionalized 9-fluorene-9-ylidene appended quinazolin-4-ones
Source: Royal Society of Chemistry journal article supplement (doi:10.1039/d1nj05379e), 2022-01-01
Supplement: d1nj05379e1.pdf [file d1nj05379e1.pdf]

## **BF<sub>3</sub>.OEt<sub>2</sub> Catalyzed Synthesis of Functionalized 9-fluorene-9-ylidene Appended Quinazolin-4-ones**

**Mohanakumaran Athira, Suresh Snoxma Smile and Ponnusamy Shanmugam\***

*Organic and Bioorganic Chemistry Division, CSIR-Central Leather Research Institute (CLRI), Adyar, Chennai-600020, India;*

Email: [shanmu196@rediffmail.com](mailto:shanmu196@rediffmail.com)

### **Content**

1. Scanned copies of spectra (<sup>1</sup>H and <sup>13</sup>C, DEPT-135 NMR, HRMS)
2. Basic crystallographic data for compounds **3i** and **4b**

1. Scanned copies of spectra ( $^1\text{H}$  and  $^{13}\text{C}$ , DEPT-135 NMR, HRMS)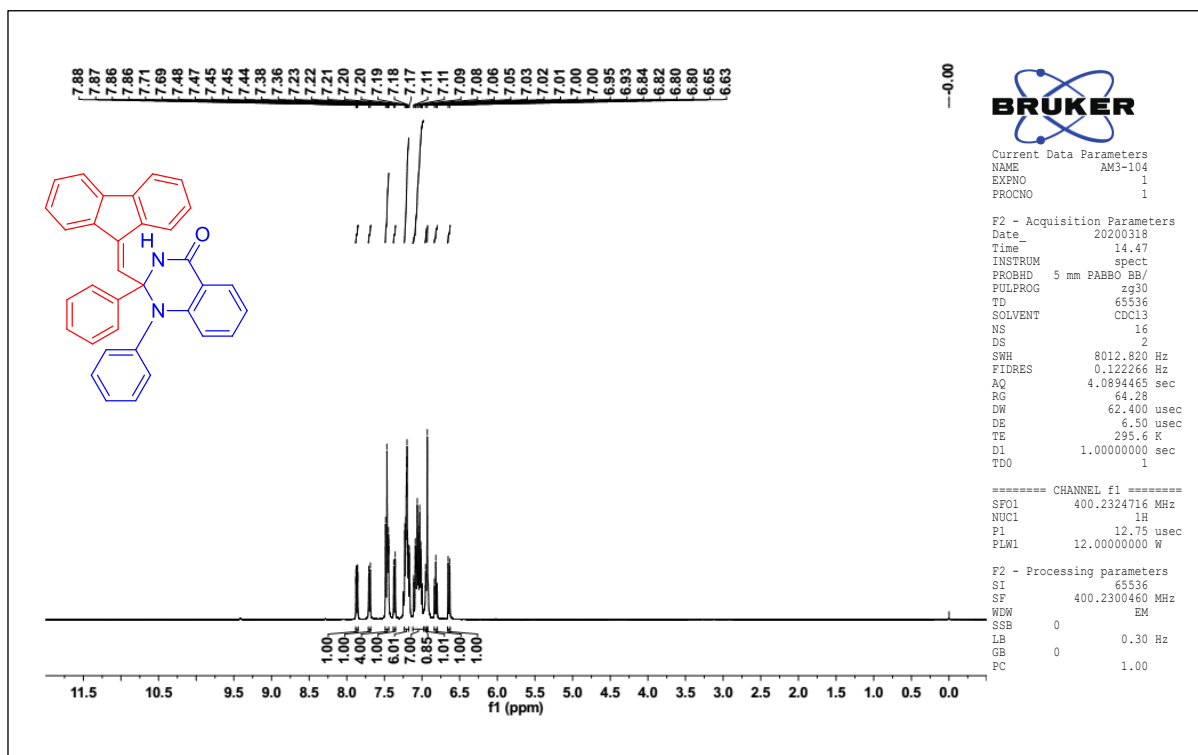Figure 1  $^1\text{H}$  NMR spectrum of compound 3a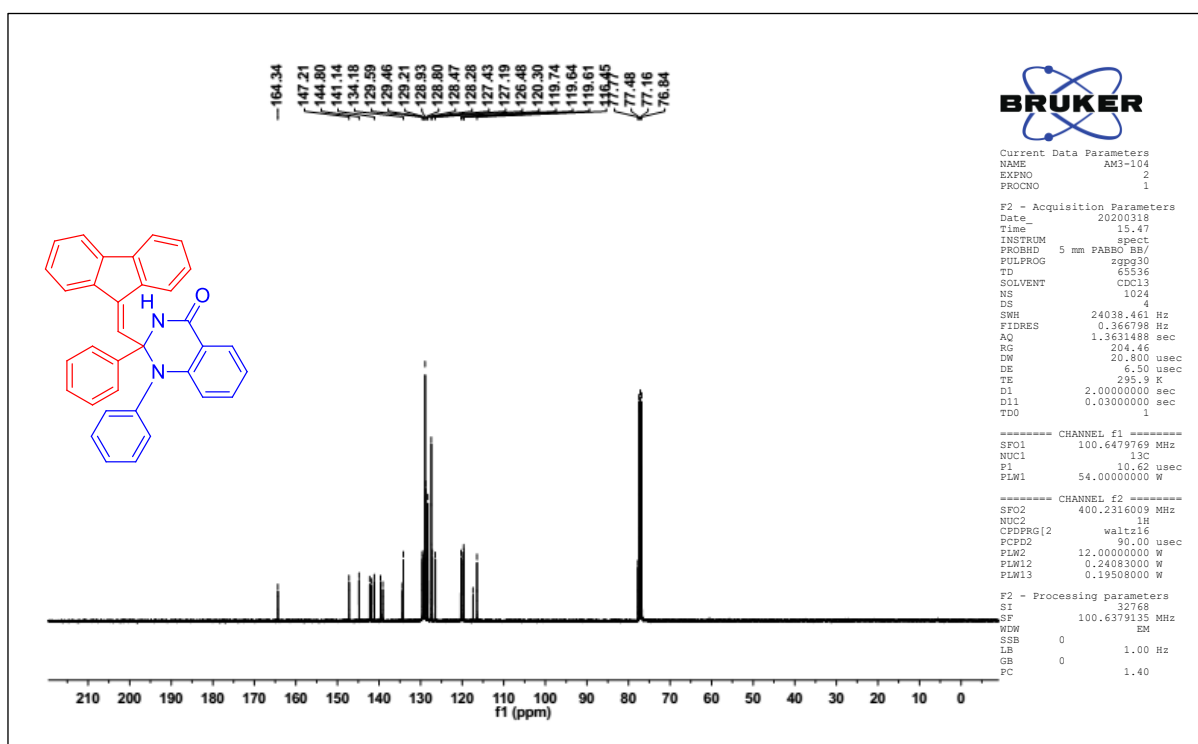Figure 2  $^{13}\text{C}$  NMR spectrum of compound 3a

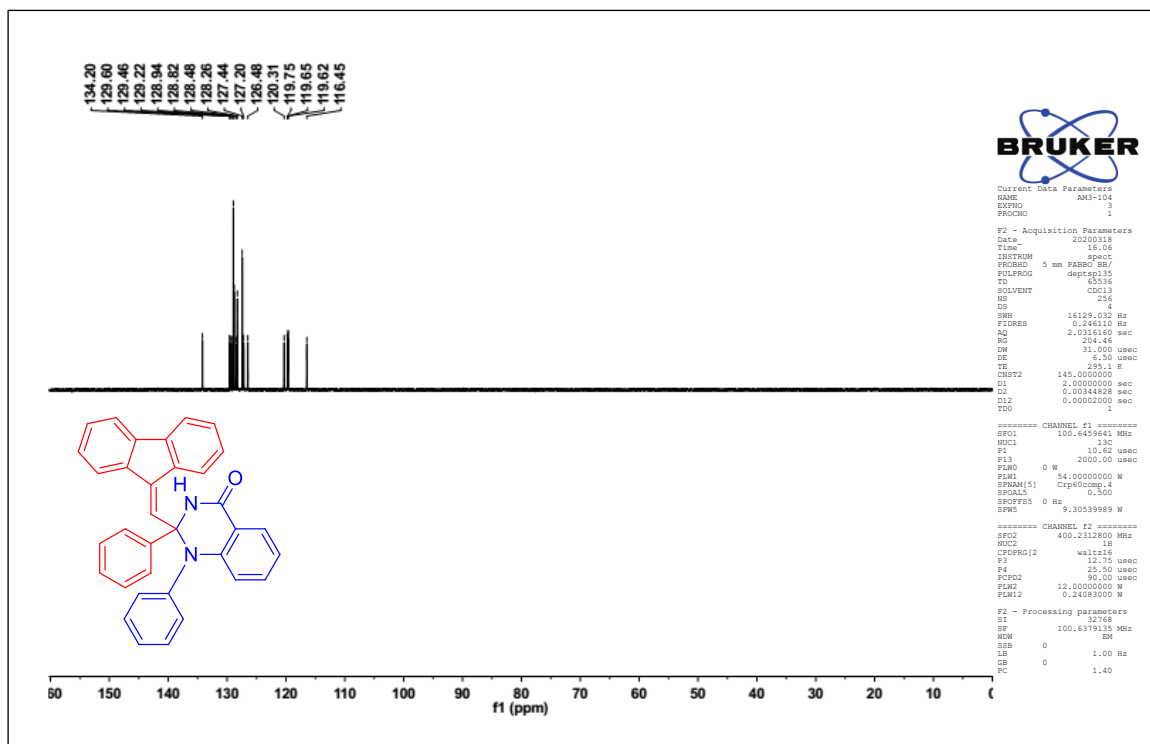

Figure 3 DEPT-135 NMR spectrum of compound 3a

AM3-104 #58-61 RT: 1.17-1.22 AV: 4 NL: 2.35E6  
 T: FTMS (1,1) + p ESI Full lock ms [100.00-1400.00]

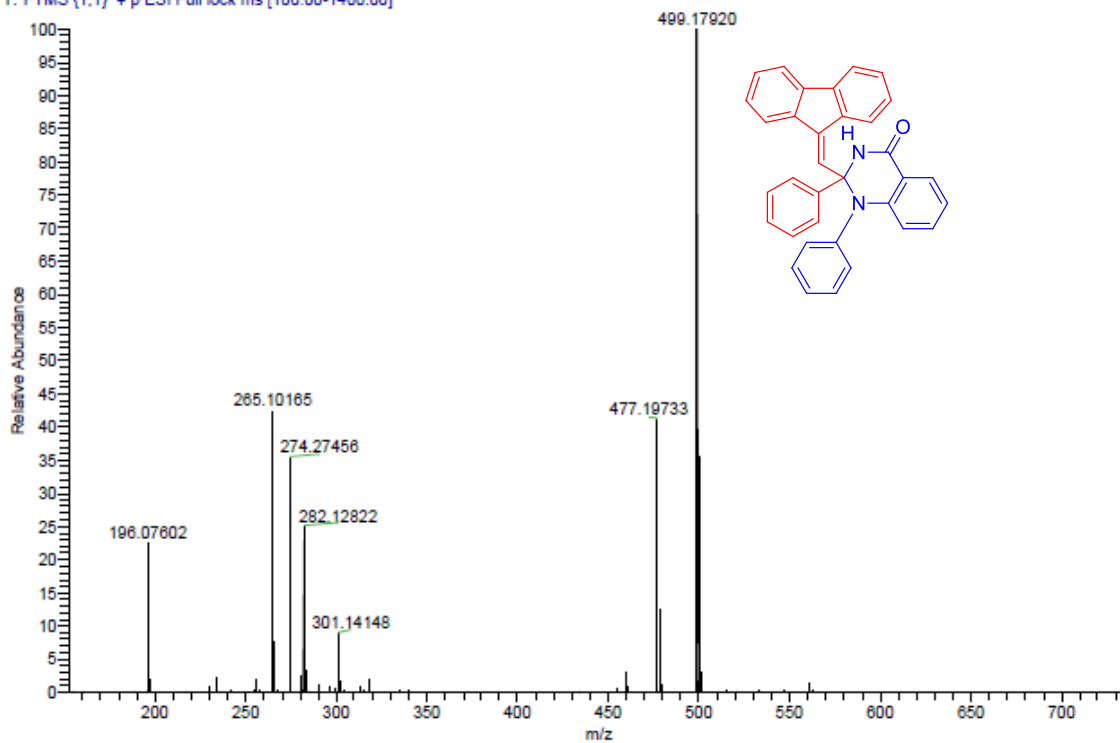

Figure 4 HRMS spectrum of compound 3a

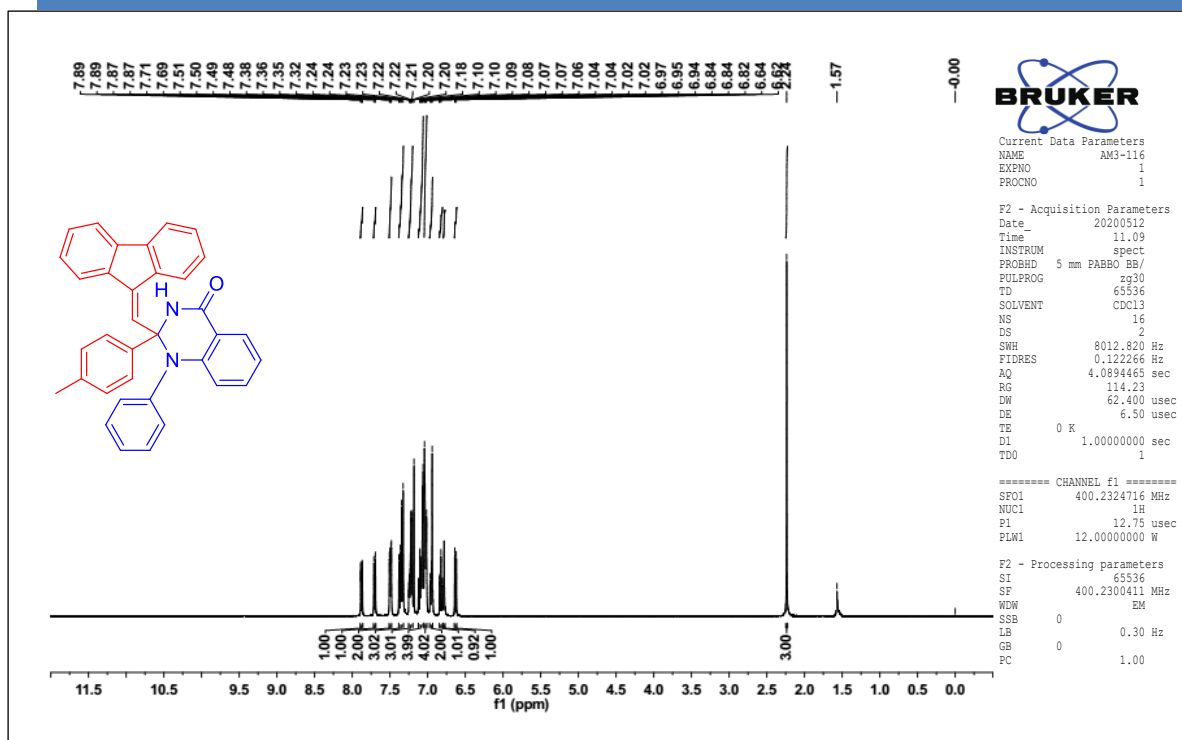

**Figure 5**  $^1\text{H}$  NMR spectrum of compound **3b**

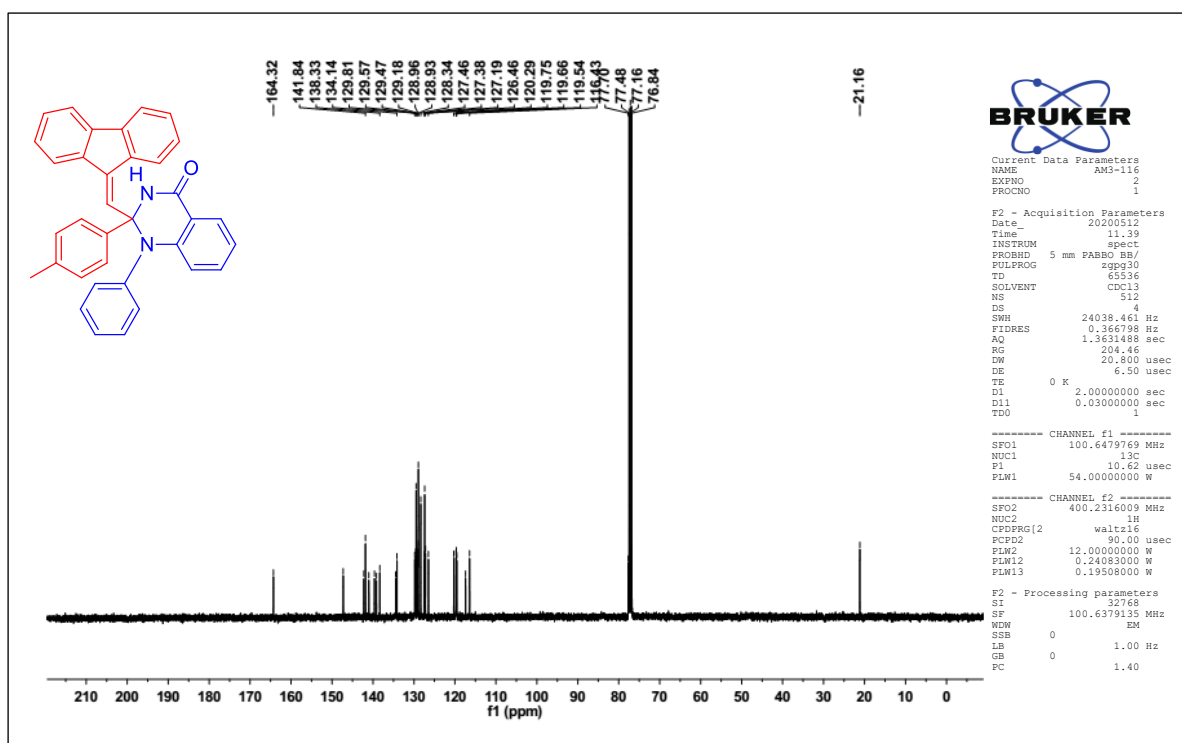

**Figure 6**  $^{13}\text{C}$  NMR spectrum of compound **3b**

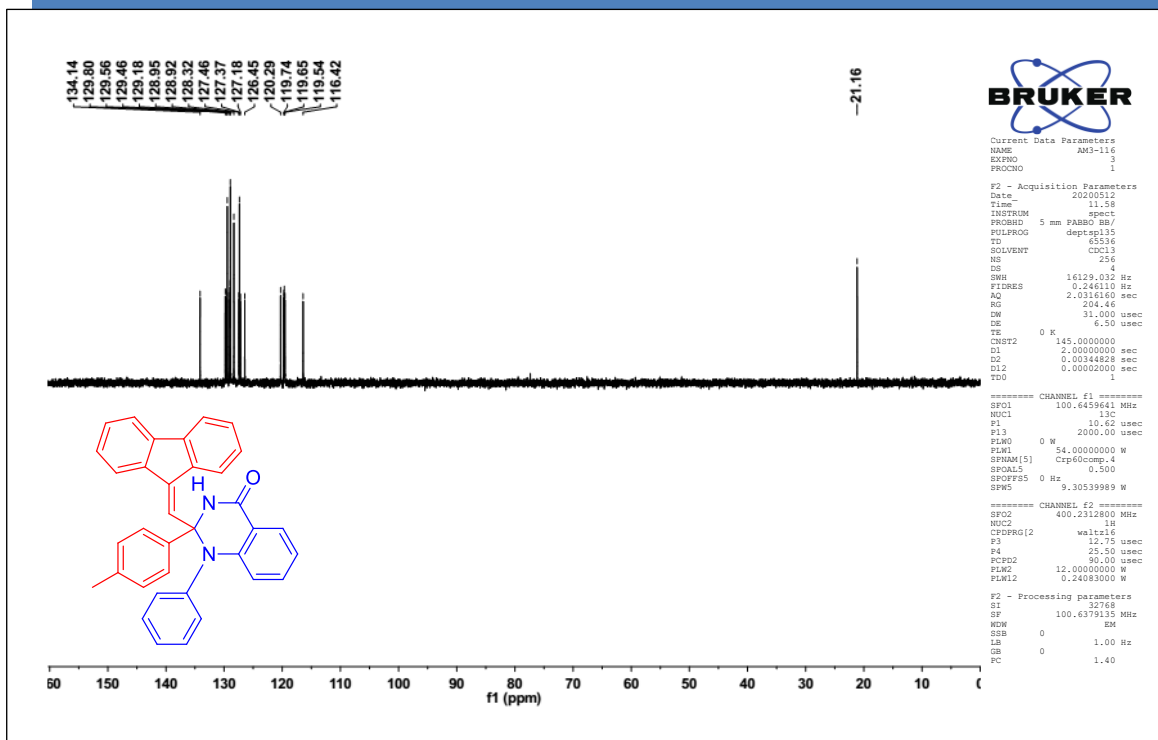

Figure 7 DEPT-135 NMR spectrum of compound 3b

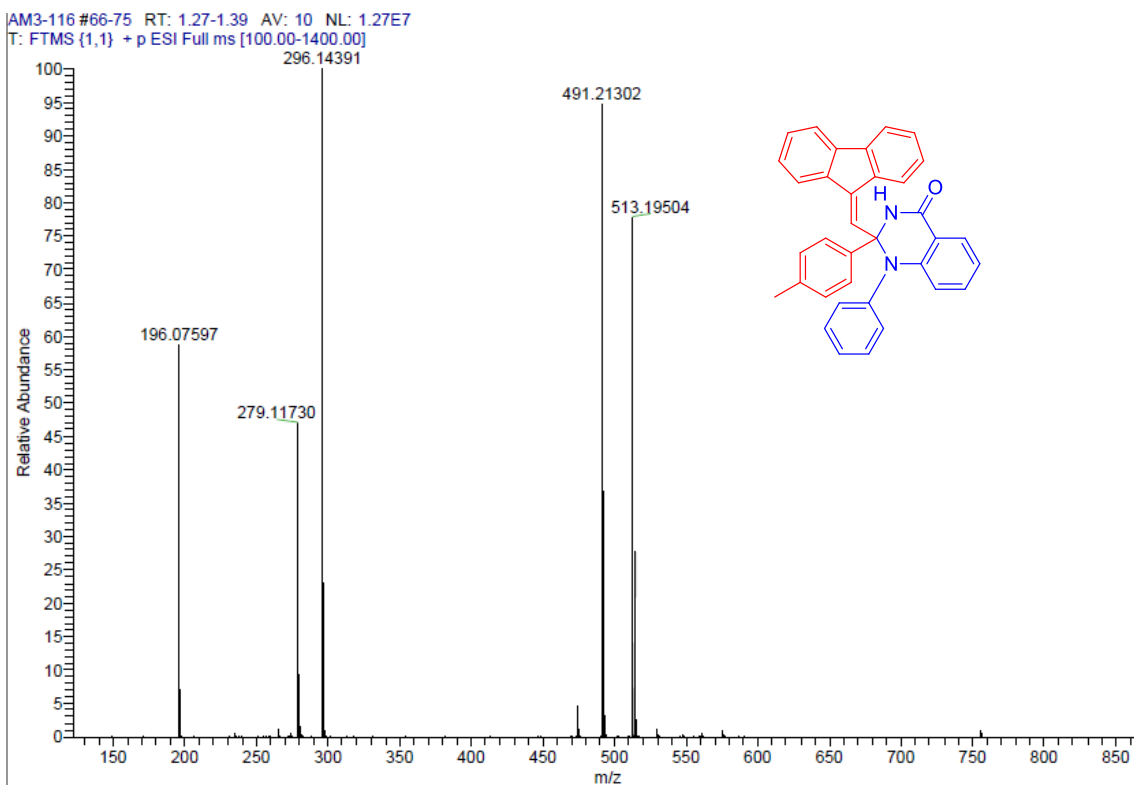

Figure 8 HRMS spectrum of compound 3b

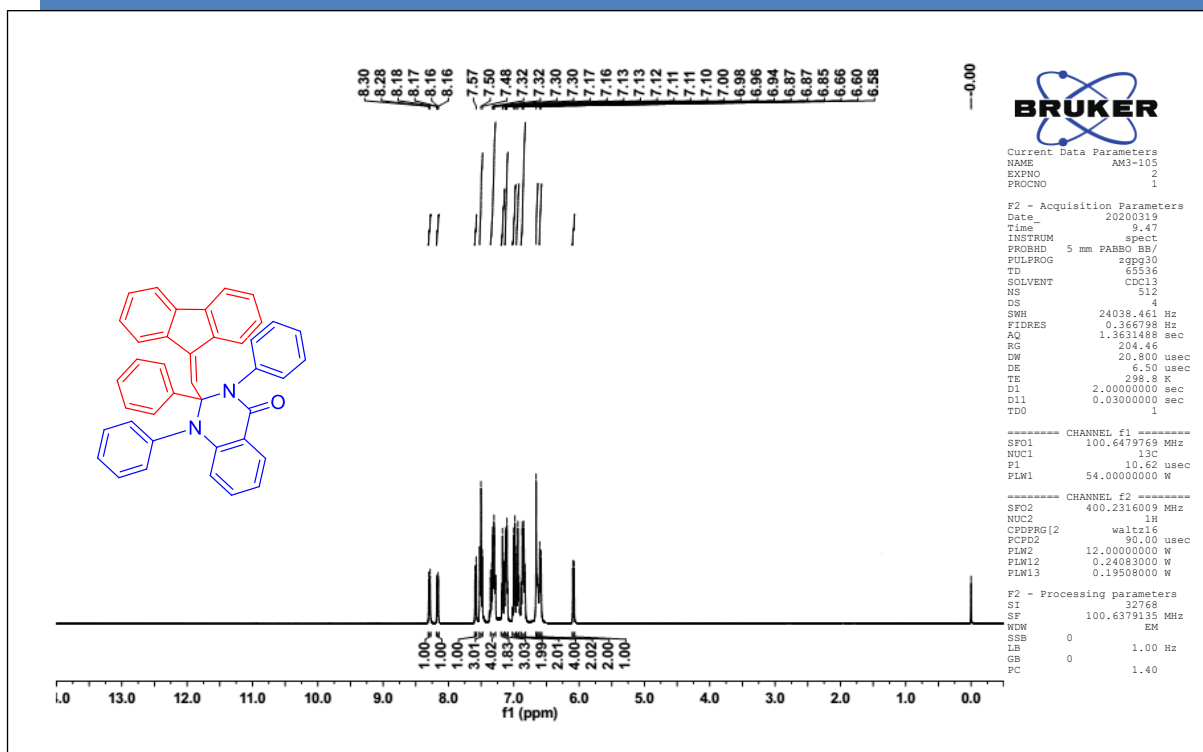Figure 9 <sup>1</sup>H NMR spectrum of compound 3c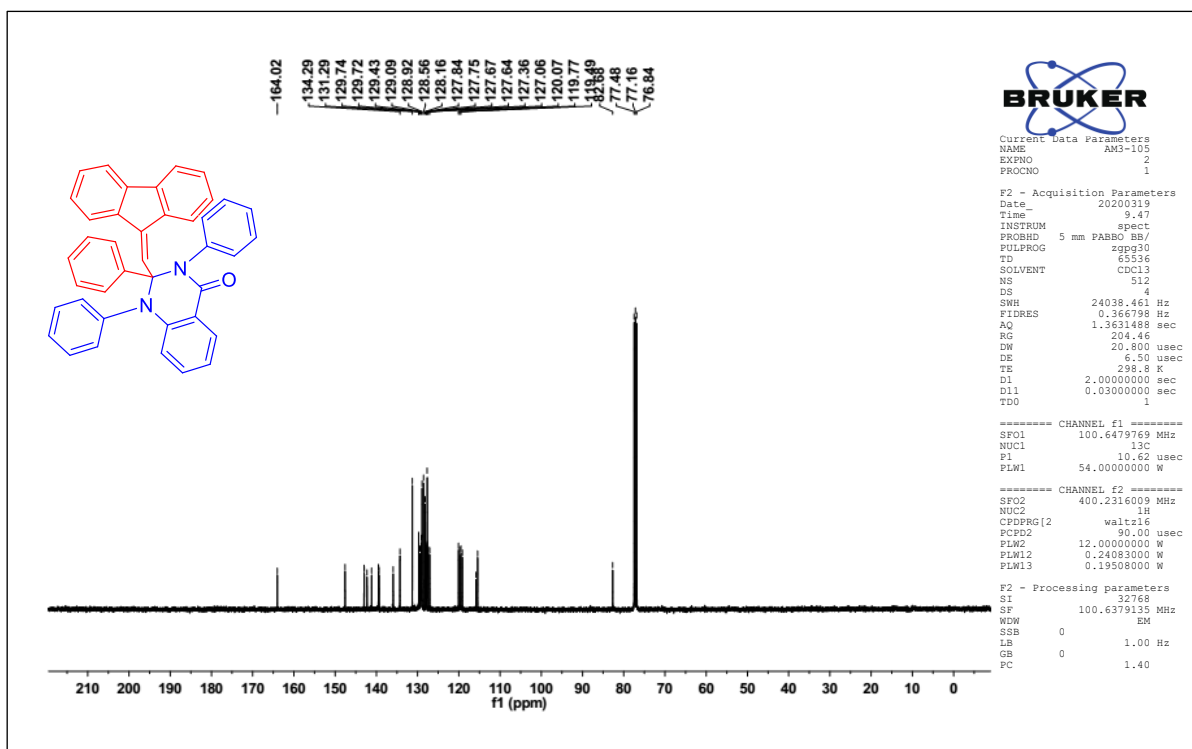Figure 10 <sup>13</sup>C NMR spectrum of compound 3c

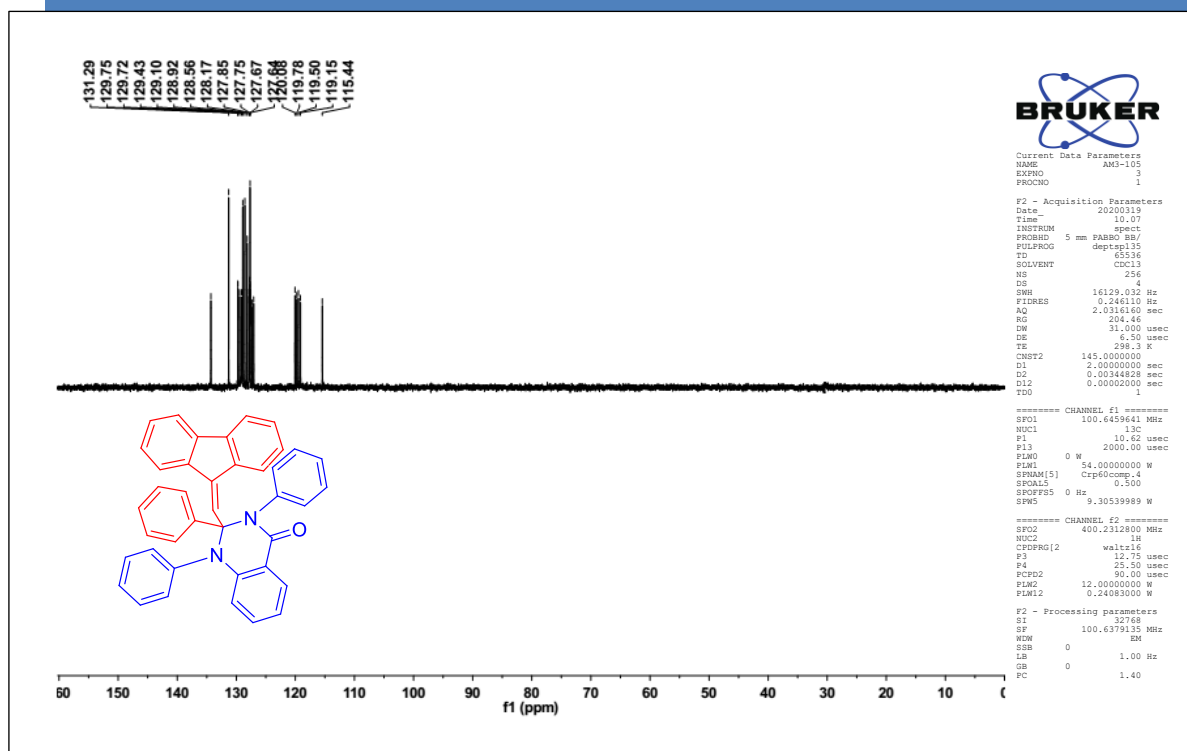

**Figure 11** DEPT-135 NMR spectrum of compound **3c**

AM3-105 #64-71 RT: 1.21-1.31 AV: 8 NL: 3.18E7  
T: FTMS (1,1) + p ESI Full ms [100.00-1400.00]

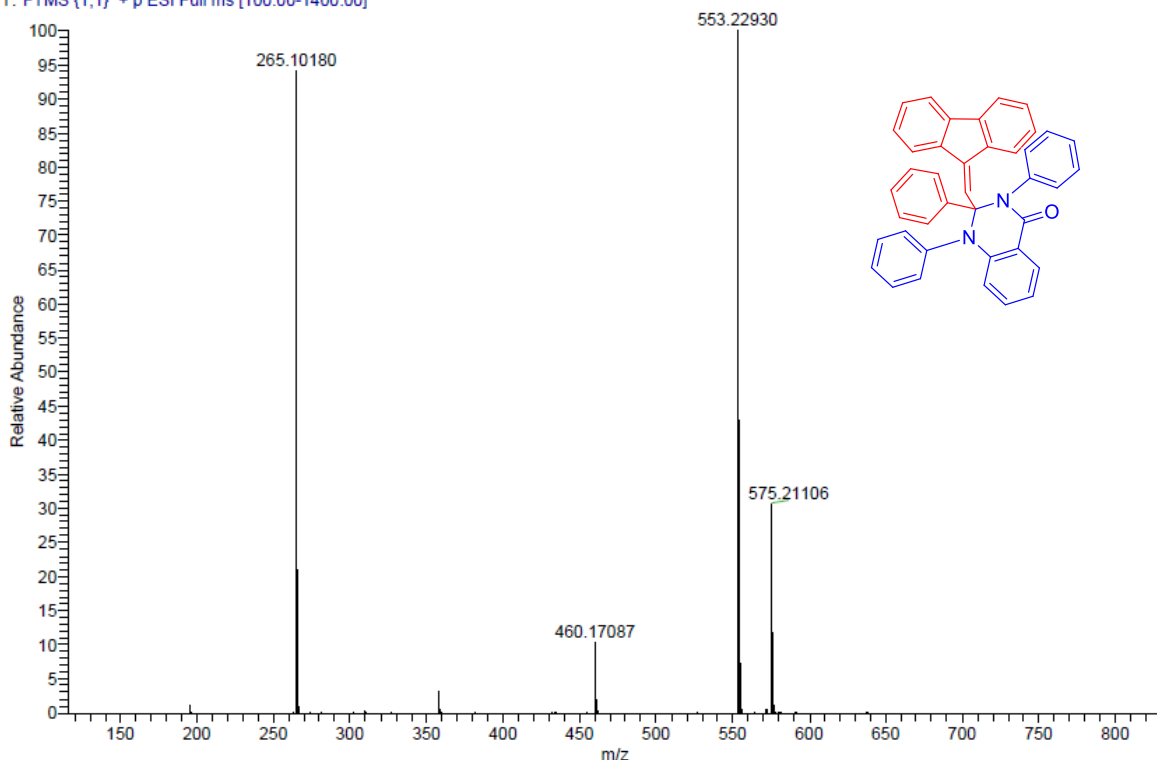

**Figure 12** HRMS spectrum of compound **3c**

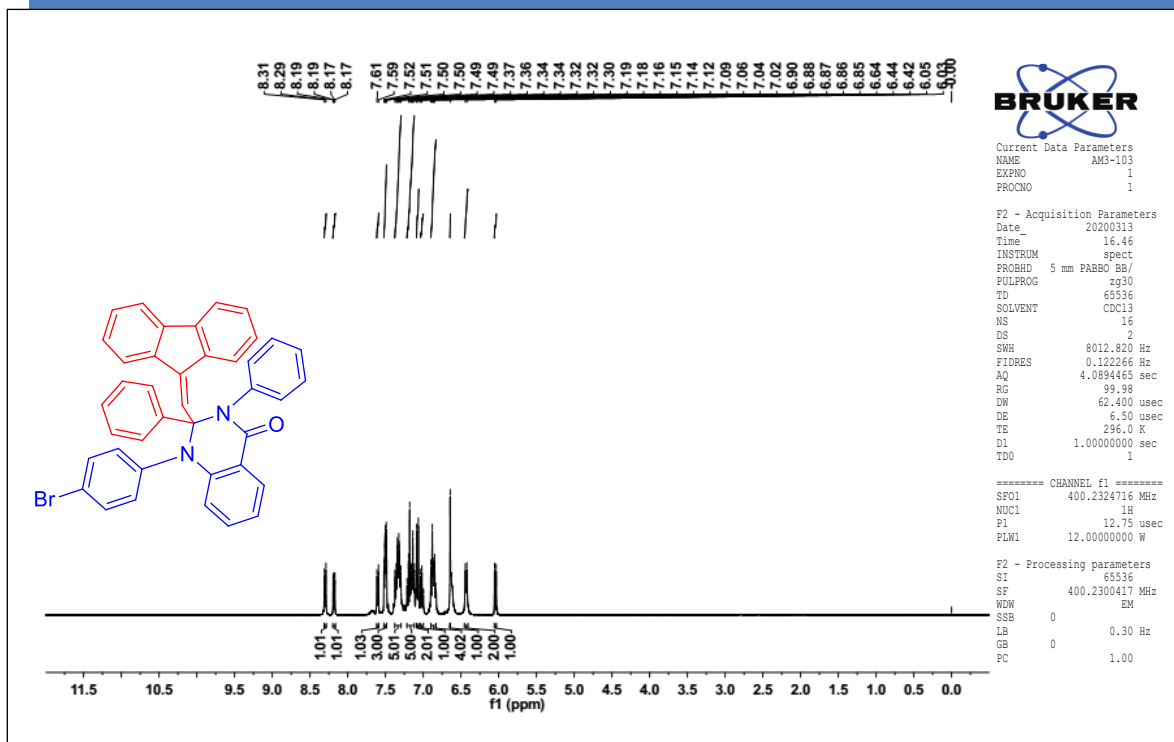Figure 13 <sup>1</sup>H NMR spectrum of compound 3d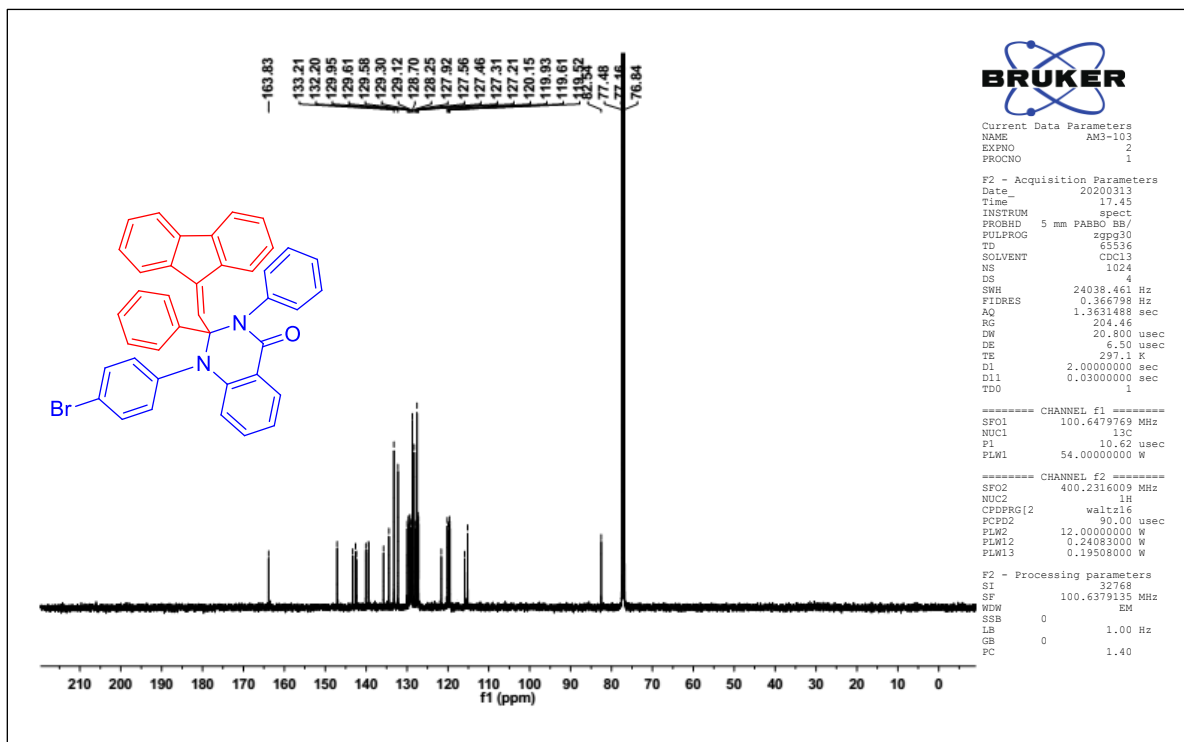Figure 14 <sup>13</sup>C NMR spectrum of compound 3d



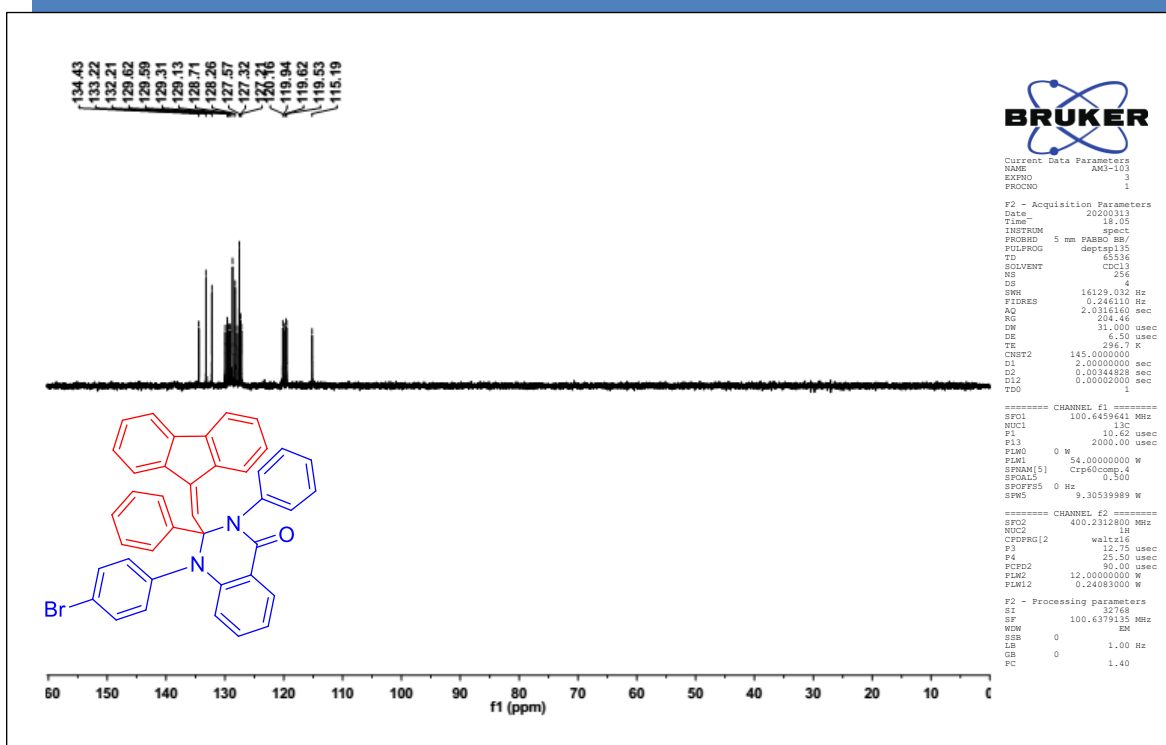Figure 15 DEPT-135 NMR spectrum of compound **3d**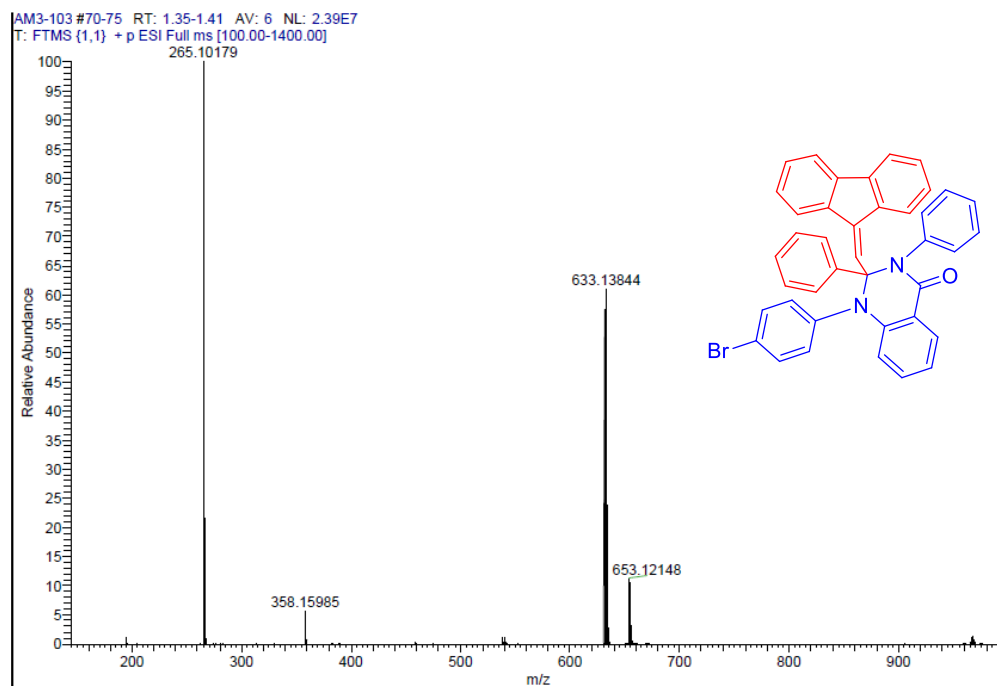Figure 16 HRMS spectrum of compound **3d**

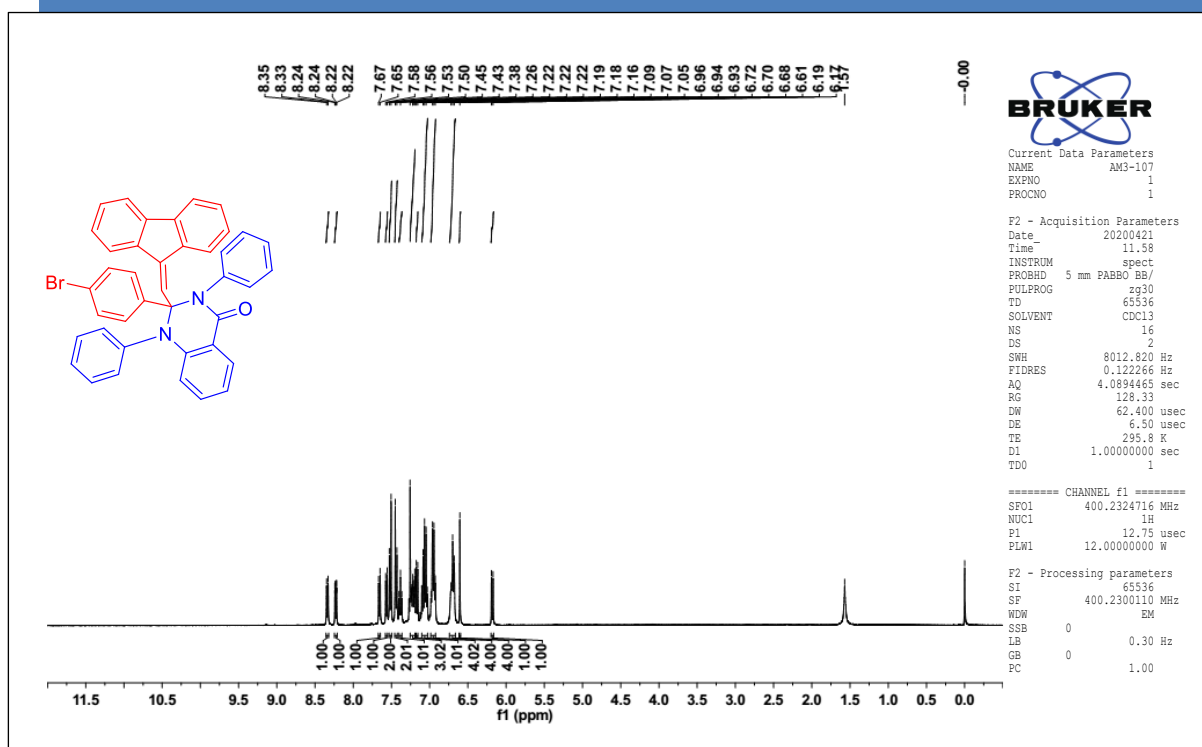

**Figure 17**  $^1\text{H}$  NMR spectrum of compound **3e**

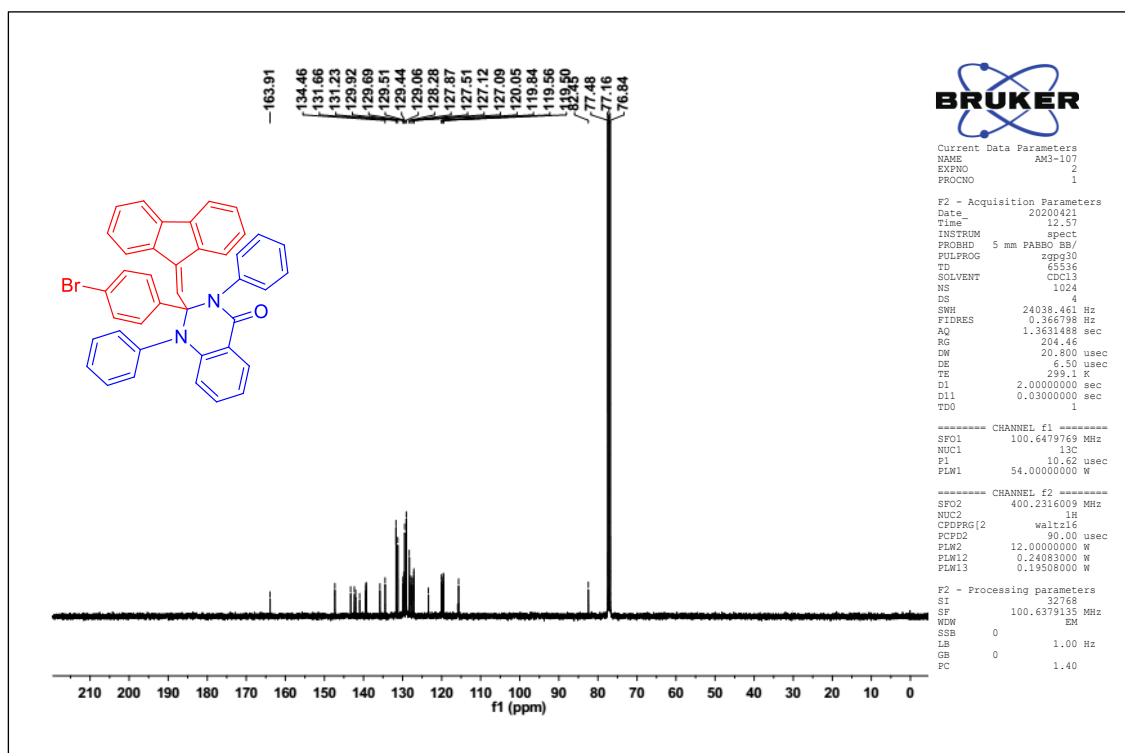

**Figure 18**  $^{13}\text{C}$  NMR spectrum of compound **3e**

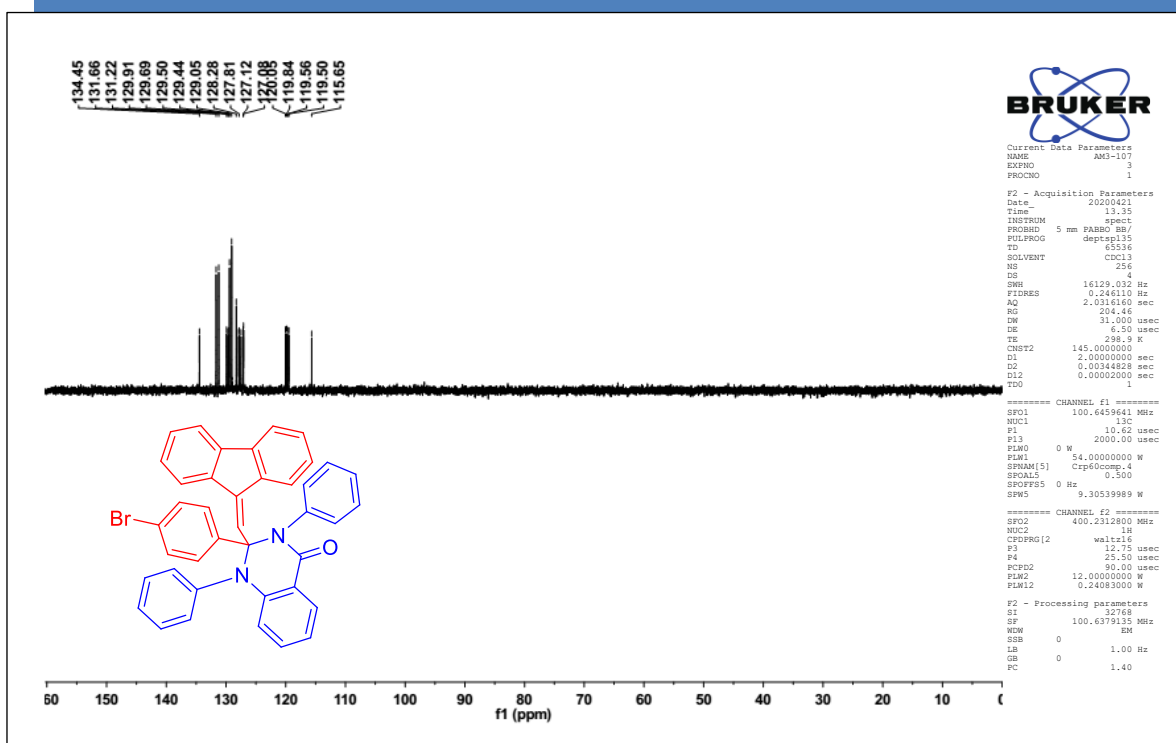

Figure 19 DEPT-135 NMR spectrum of compound 3e

T: FTMS (1,1) + p ESI Full ms [100.00-1400.00]

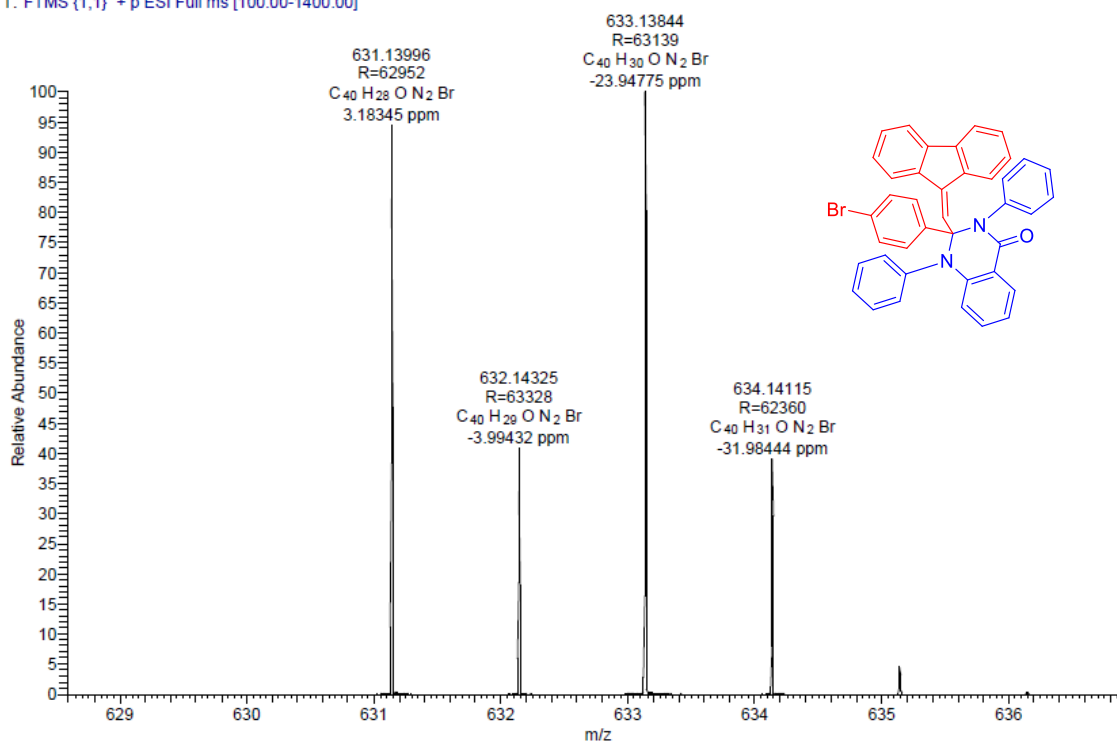

Figure 20 HRMS spectrum of compound 3e

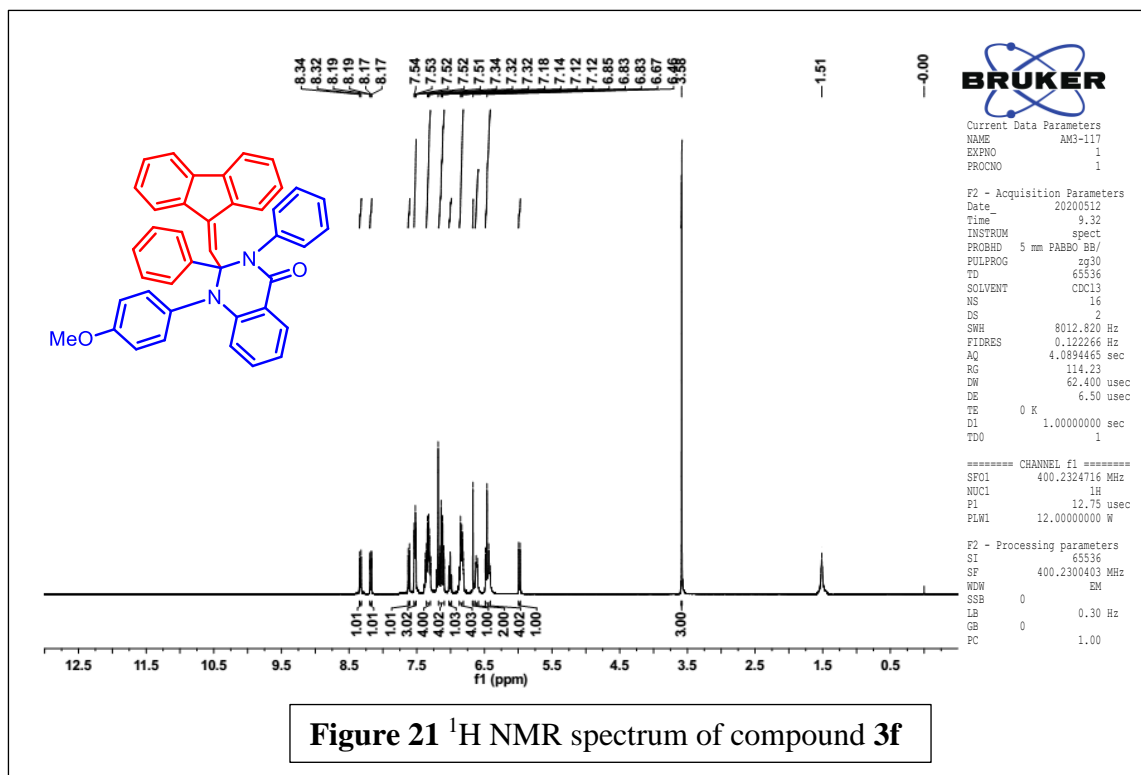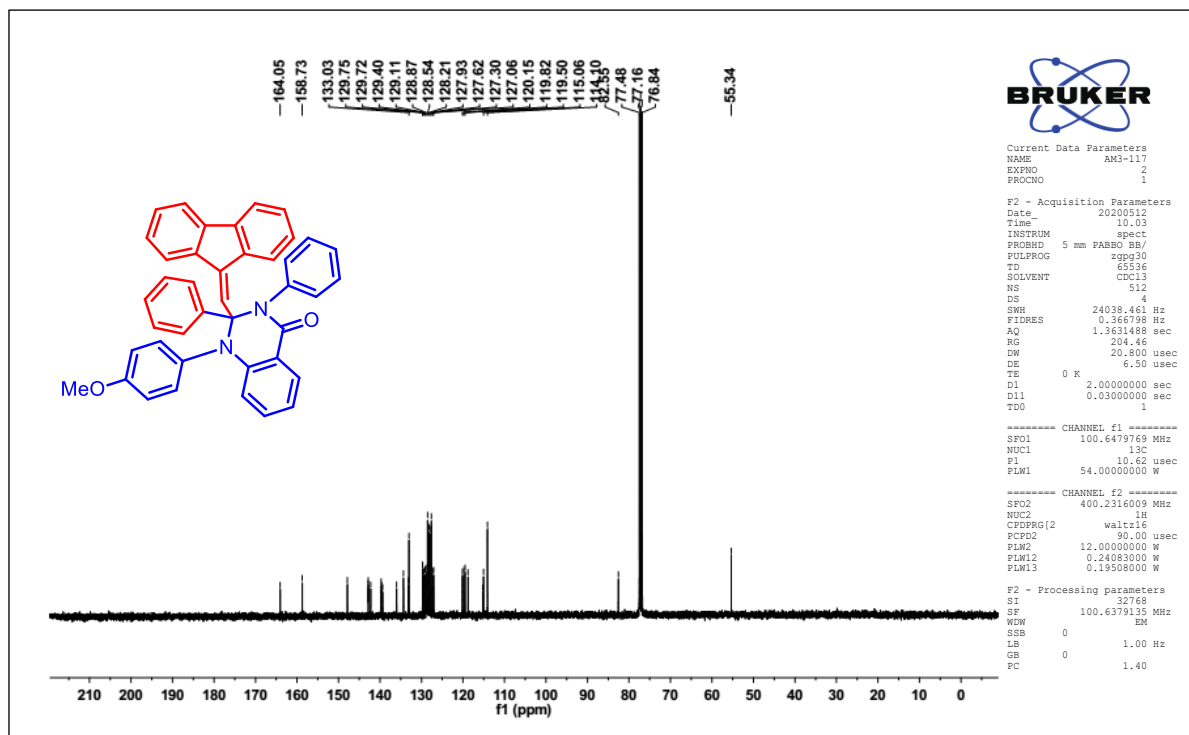

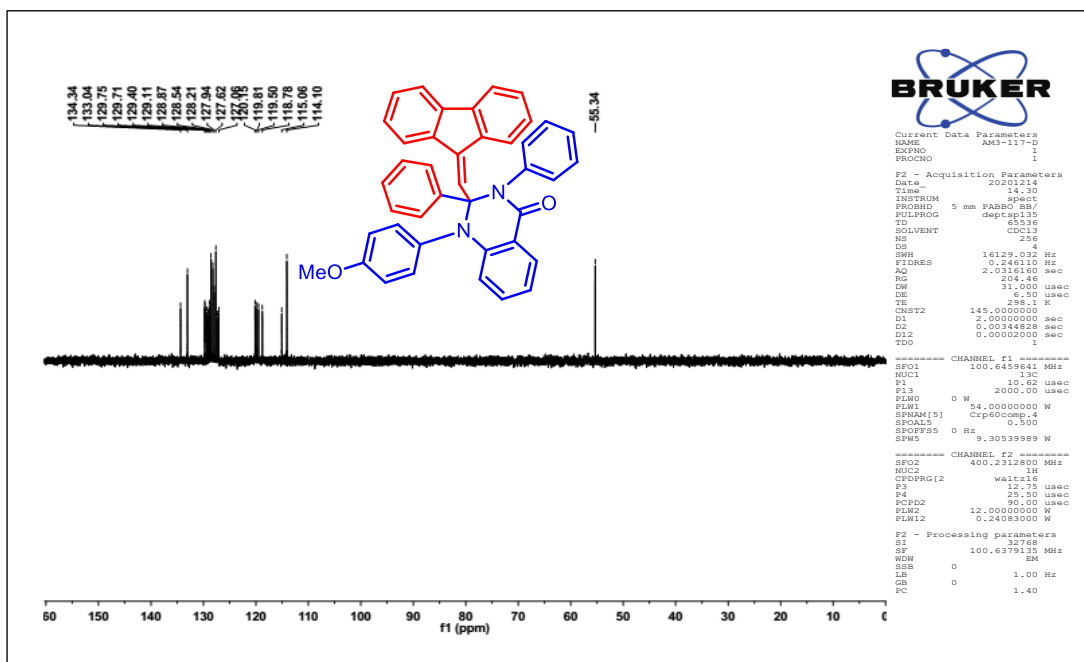

Figure 23 DEPT-135 NMR spectrum of compound 3f

AM3-117 #55-71 RT: 1.14-1.36 AV: 17 NL: 2.27E7  
 T: FTMS (1,1) + p ESI Full ms [100.00-1400.00]

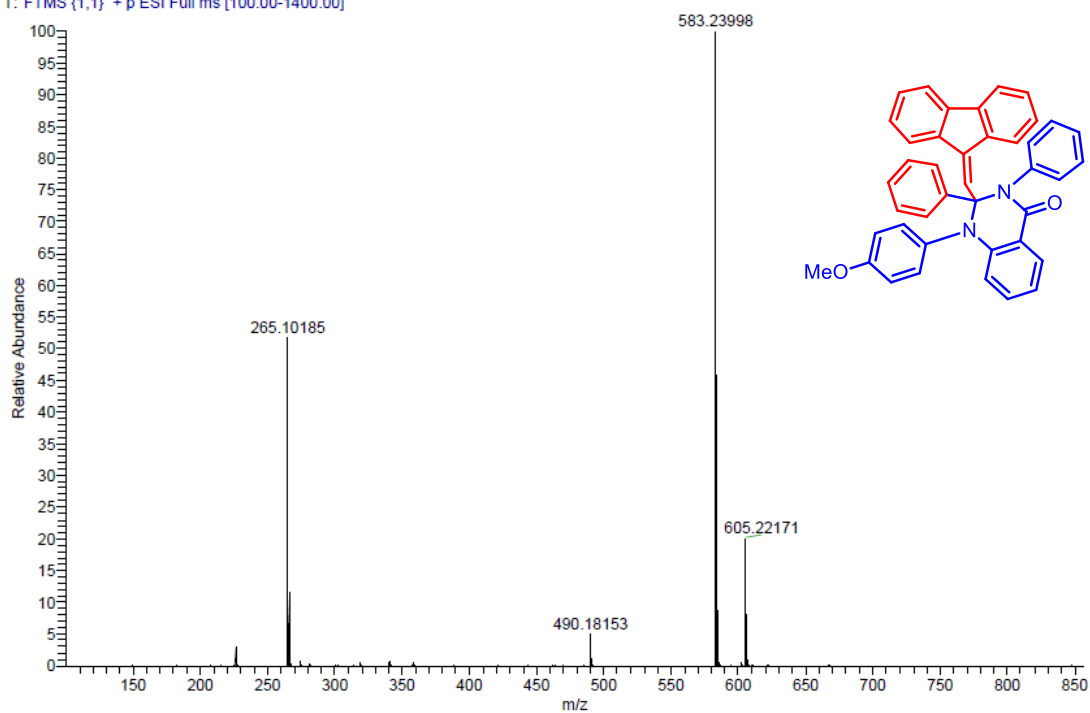

Figure 24 HRMS spectrum of compound 3f

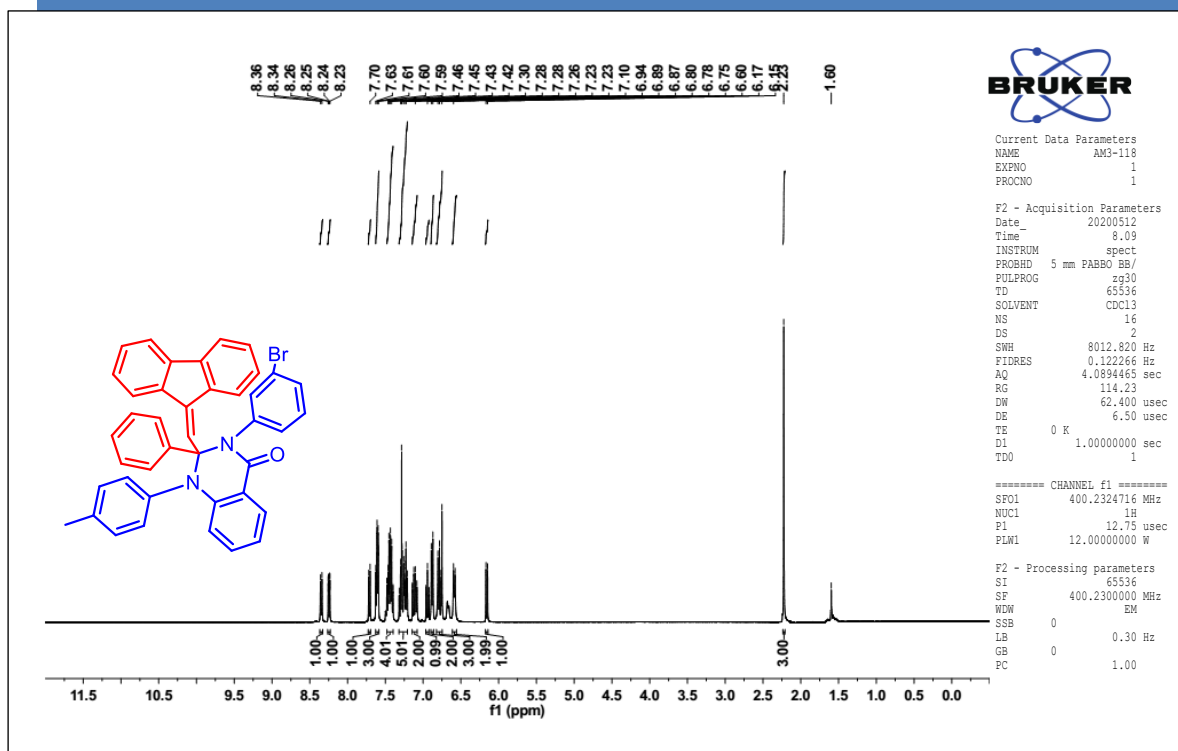Figure 25  $^1\text{H}$  NMR spectrum of compound 3g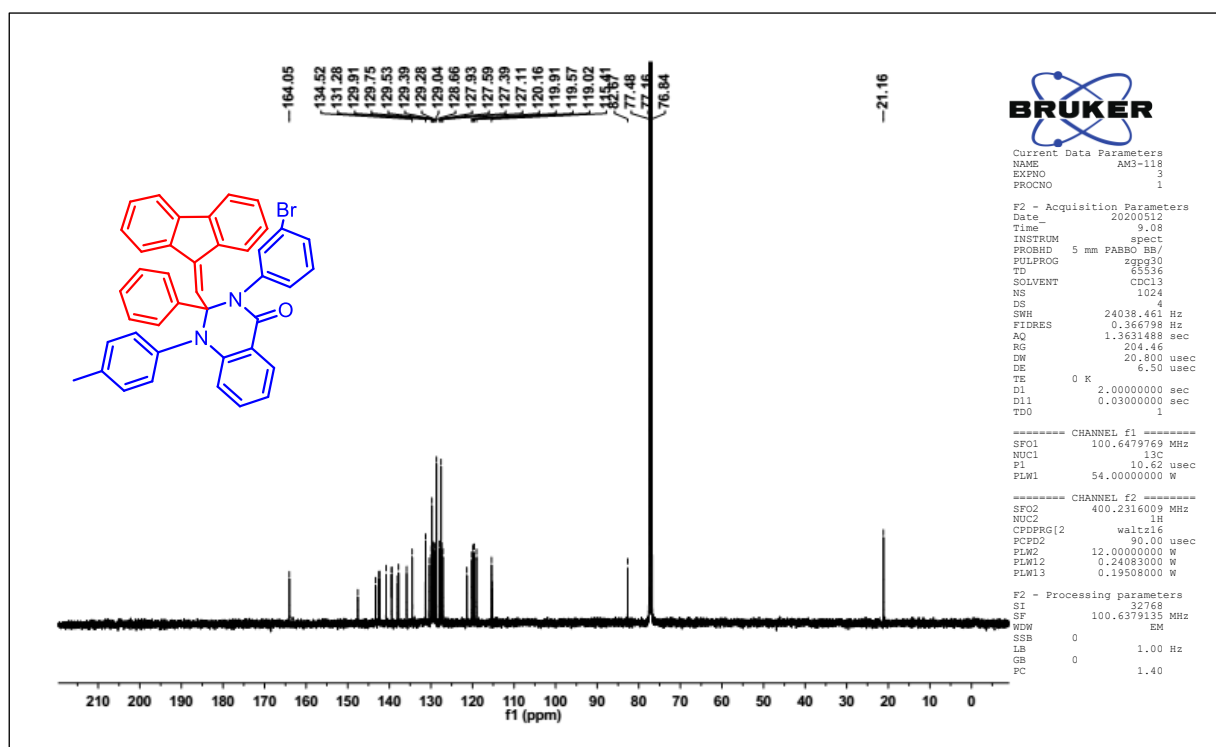Figure 26  $^{13}\text{C}$  NMR spectrum of compound 3g

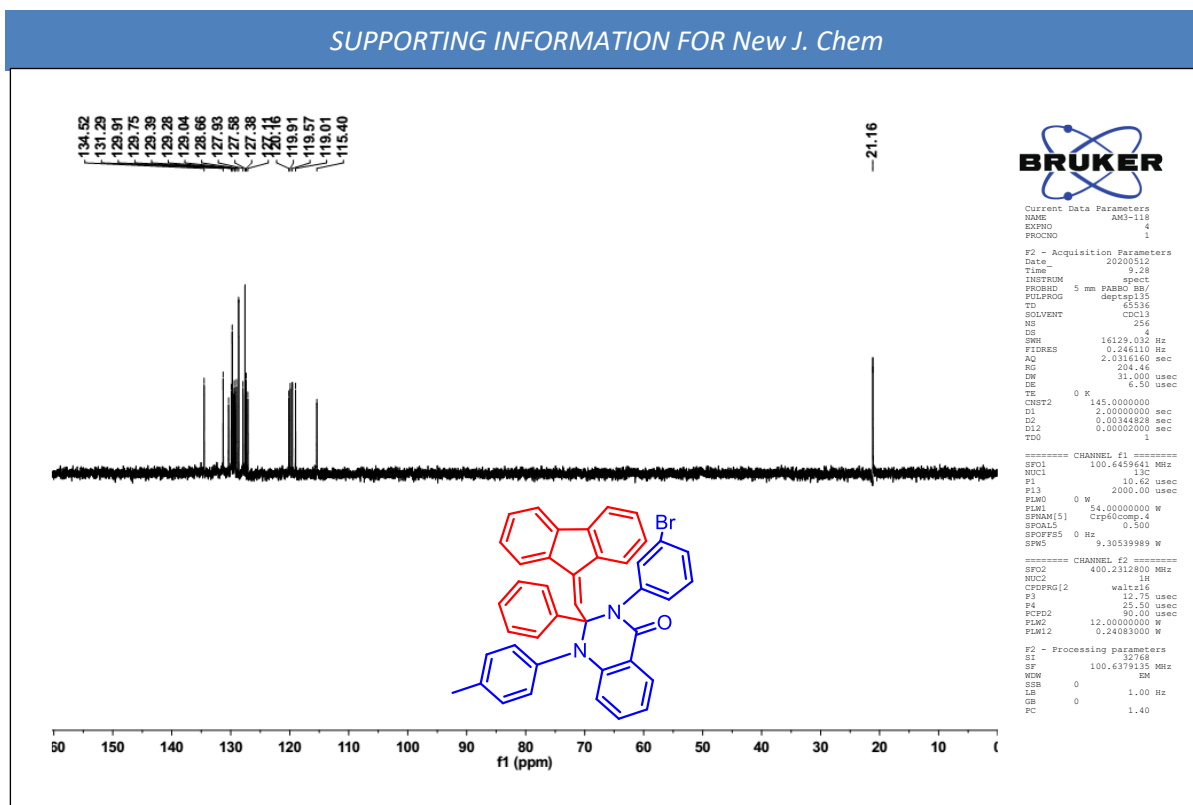

Figure 27 DEPT-135 NMR spectrum of compound 3g

AM3-118 #51-80 RT: 1.06-1.46 AV: 30 NL: 4.53E7  
 T: FTMS (1,1) + p ESI Full lock ms [100.00-1400.00]

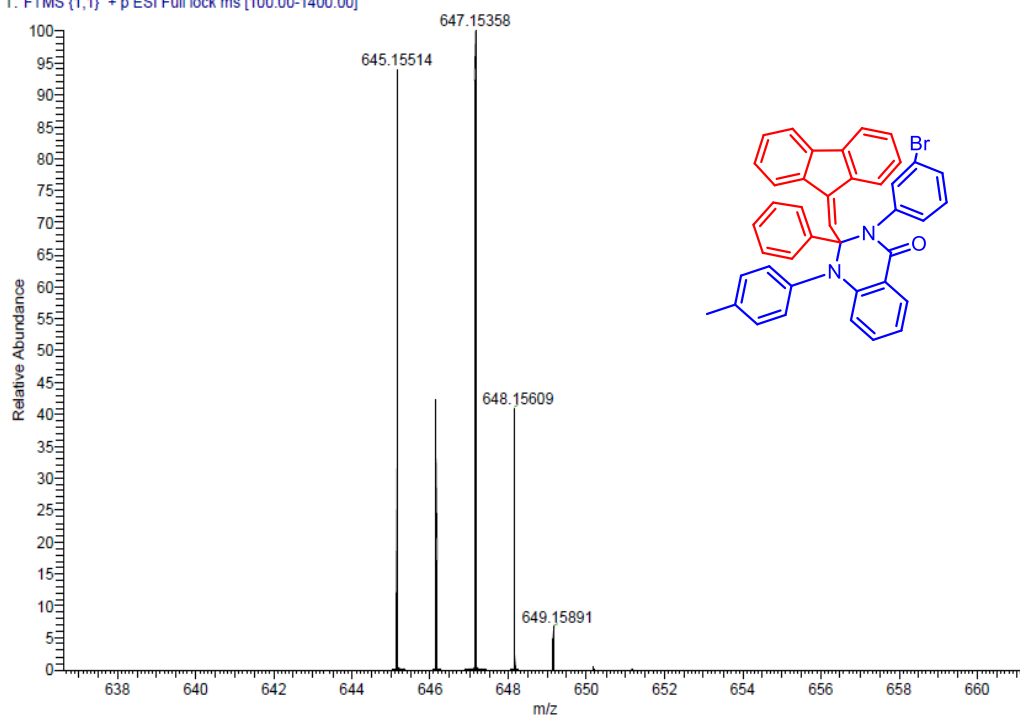

Figure 28 HRMS spectrum of compound 3g

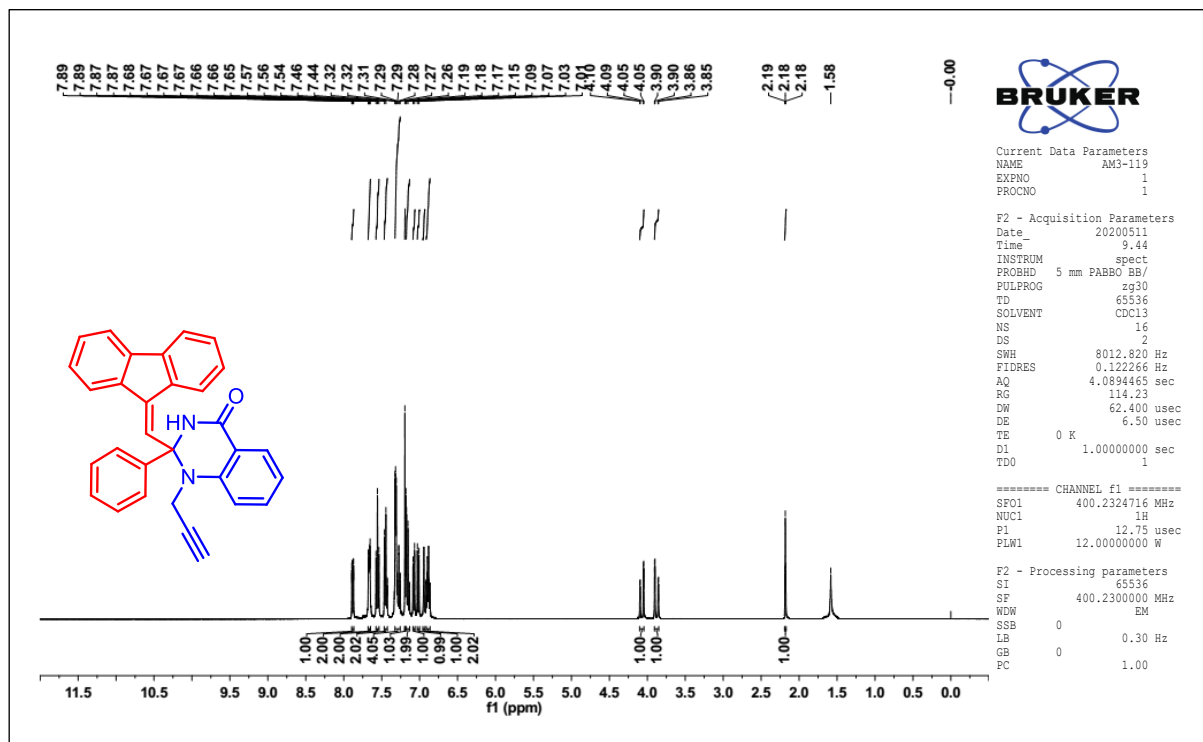

**Figure 29**  $^1\text{H}$  NMR spectrum of compound **3h**

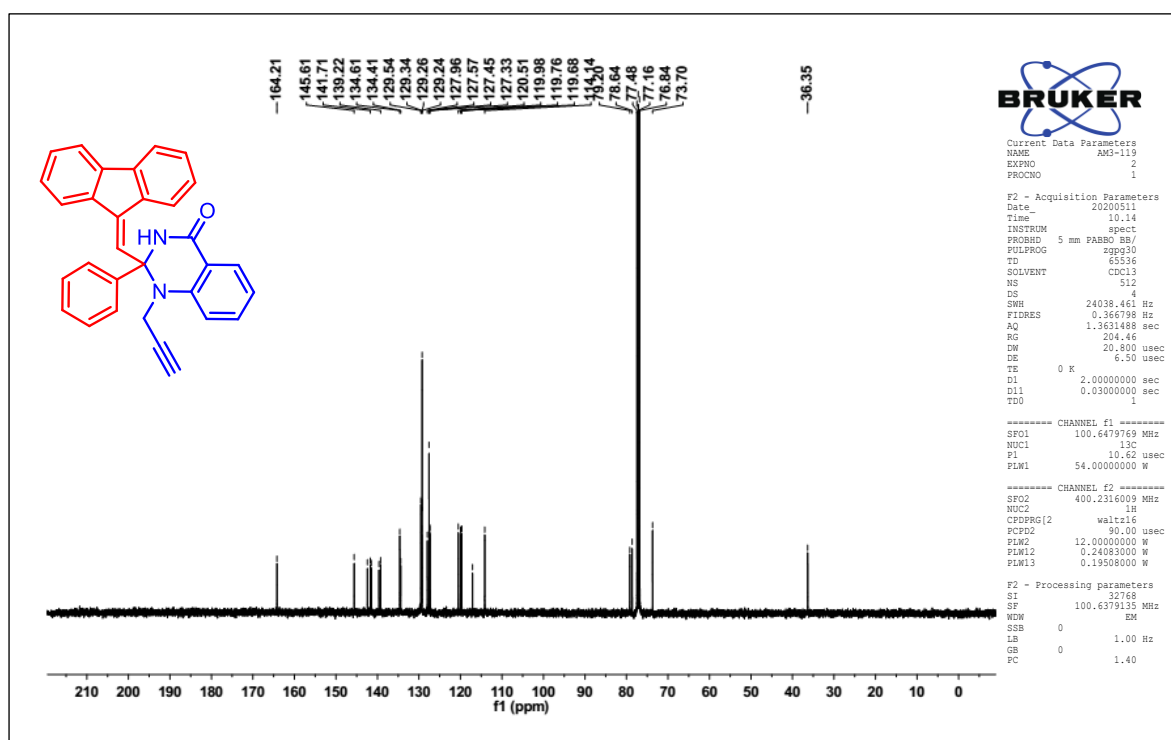

**Figure 30**  $^{13}\text{C}$  NMR spectrum of compound **3h**



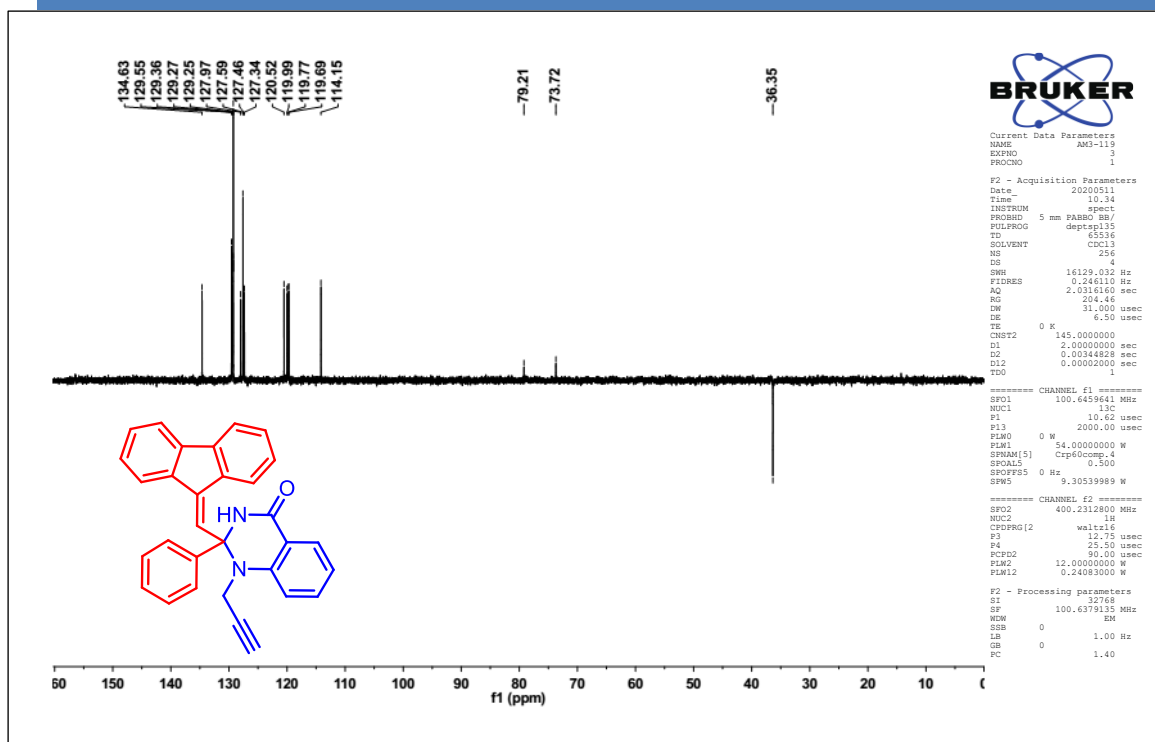

Figure 31 DEPT-135 NMR spectrum of compound 3h

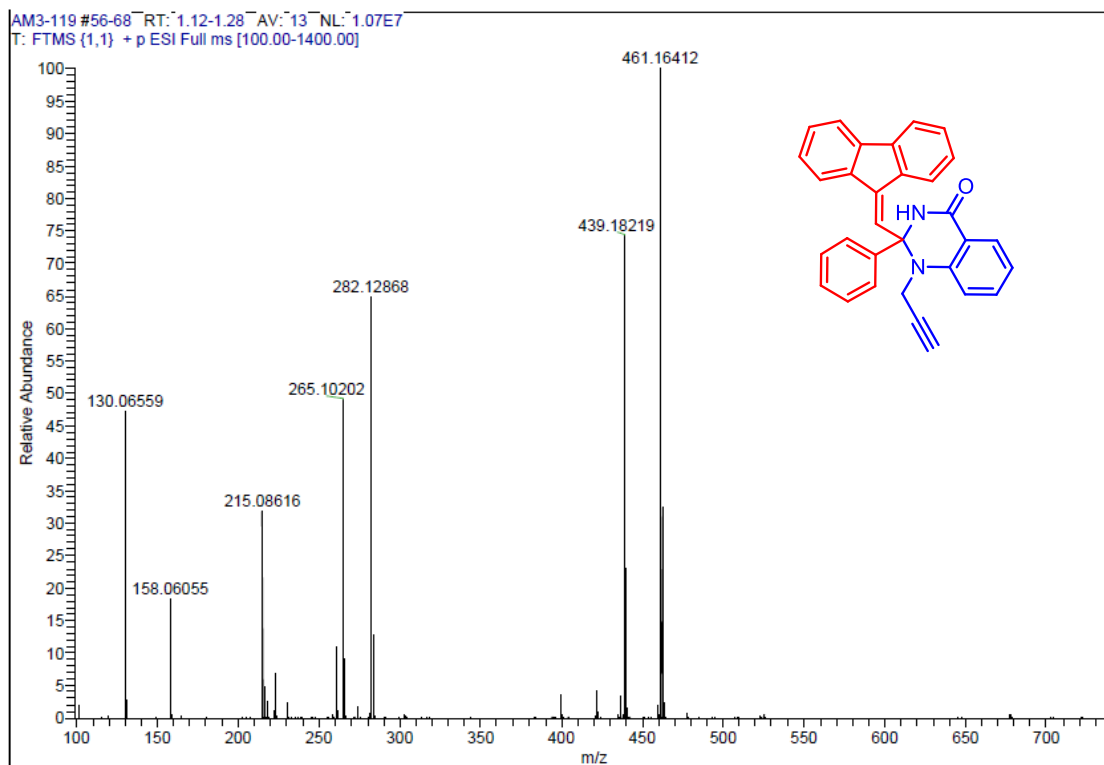

Figure 32 HRMS spectrum of compound 3h

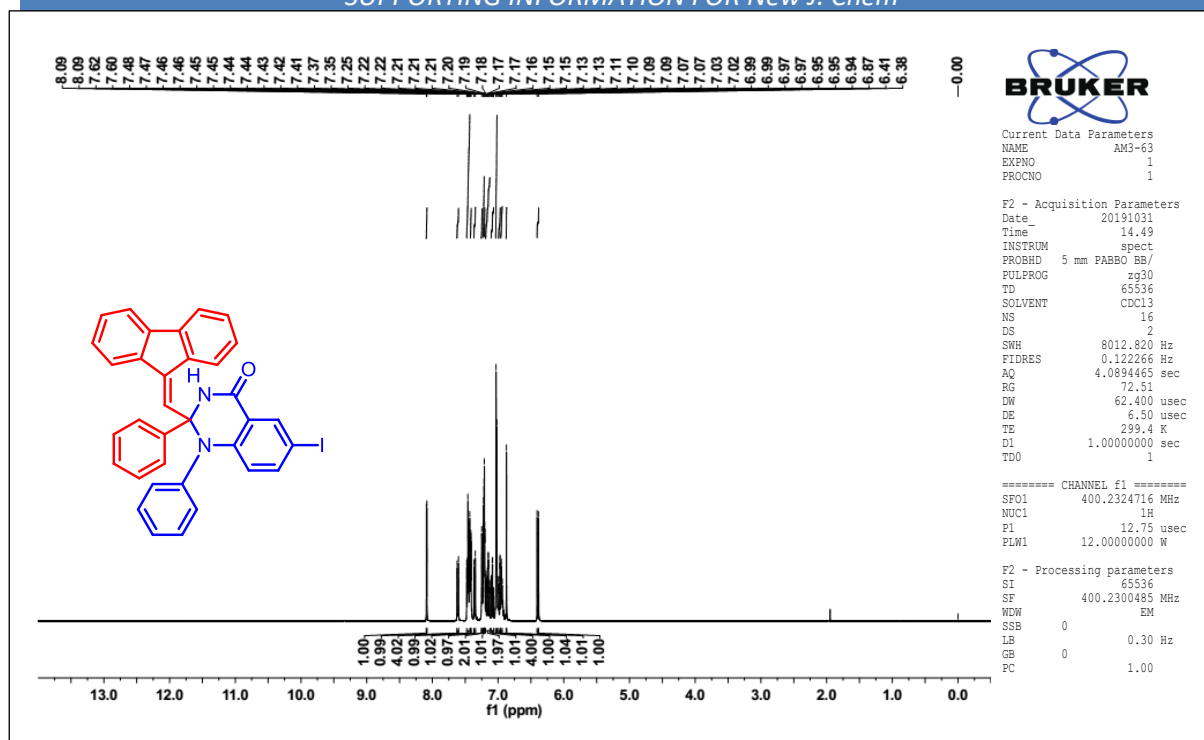Figure 33  $^1\text{H}$  NMR spectrum of compound **3i**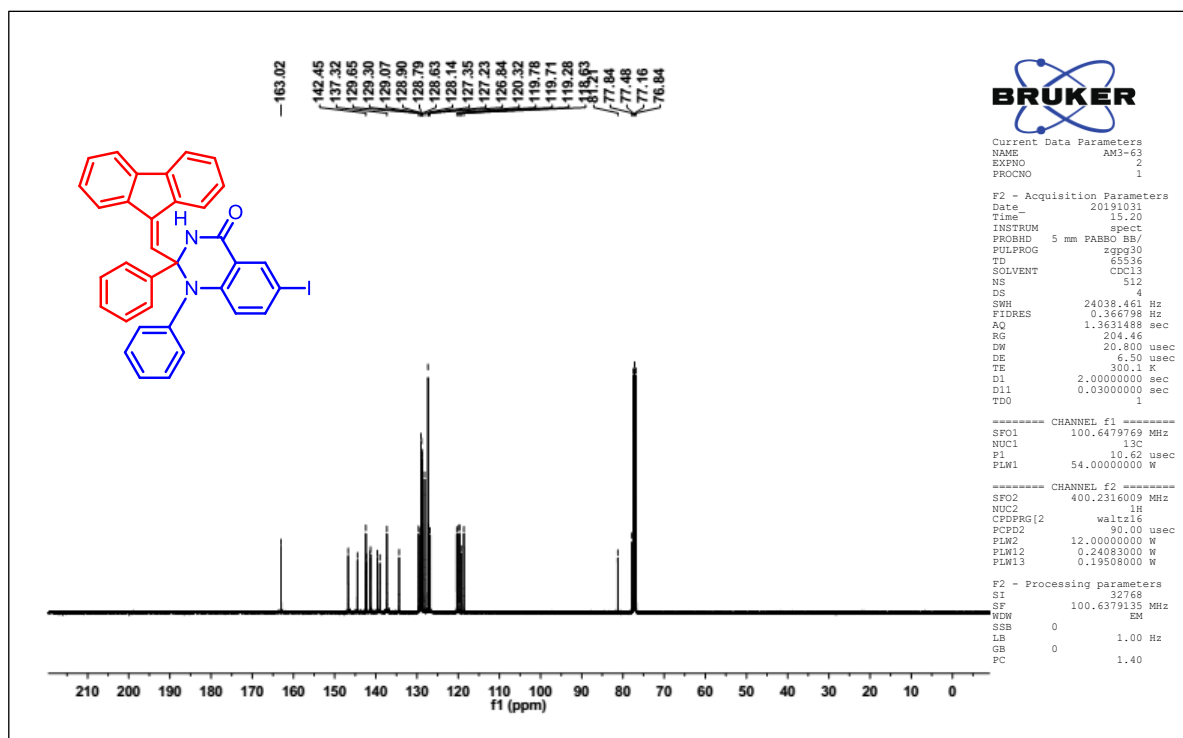Figure 34  $^{13}\text{C}$  NMR spectrum of compound **3i**

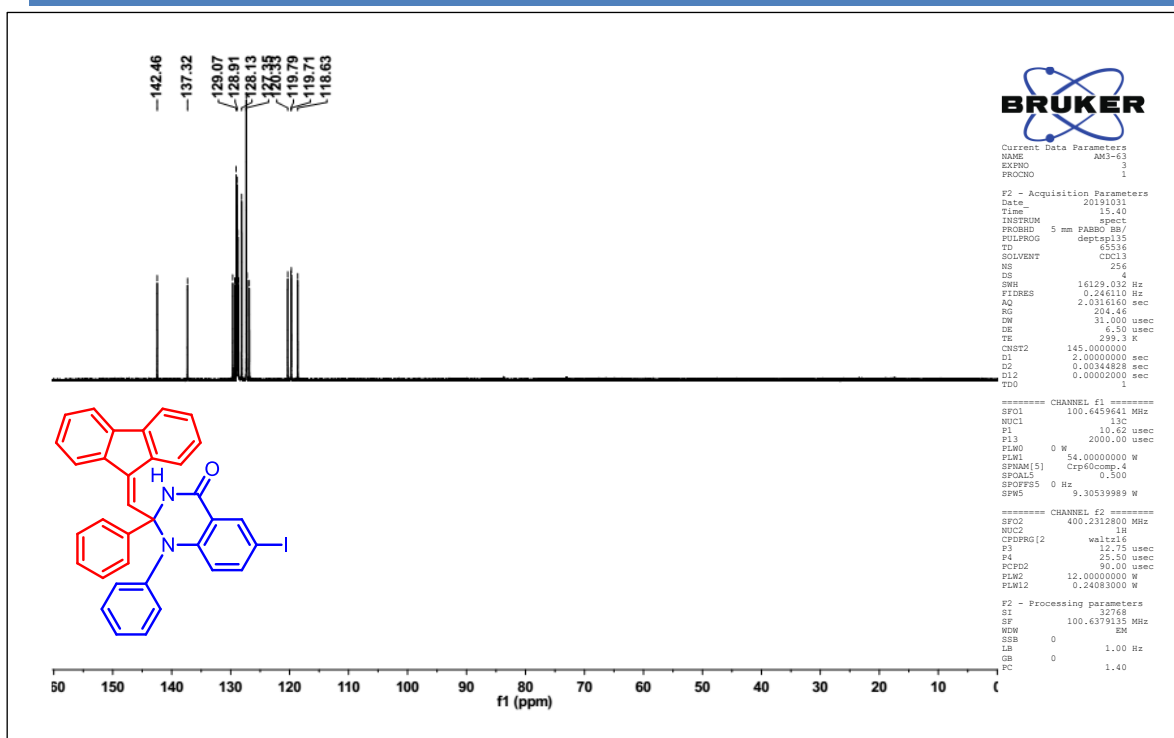Figure 35 DEPT-135 NMR spectrum of compound **3i**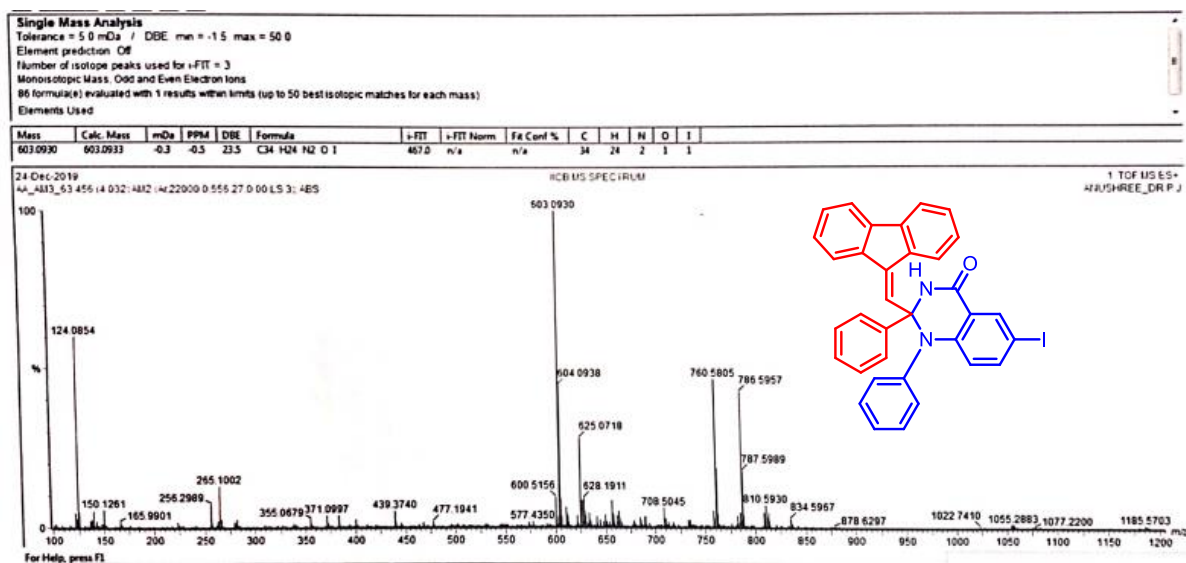Figure 36 HRMS spectrum of compound **3i**

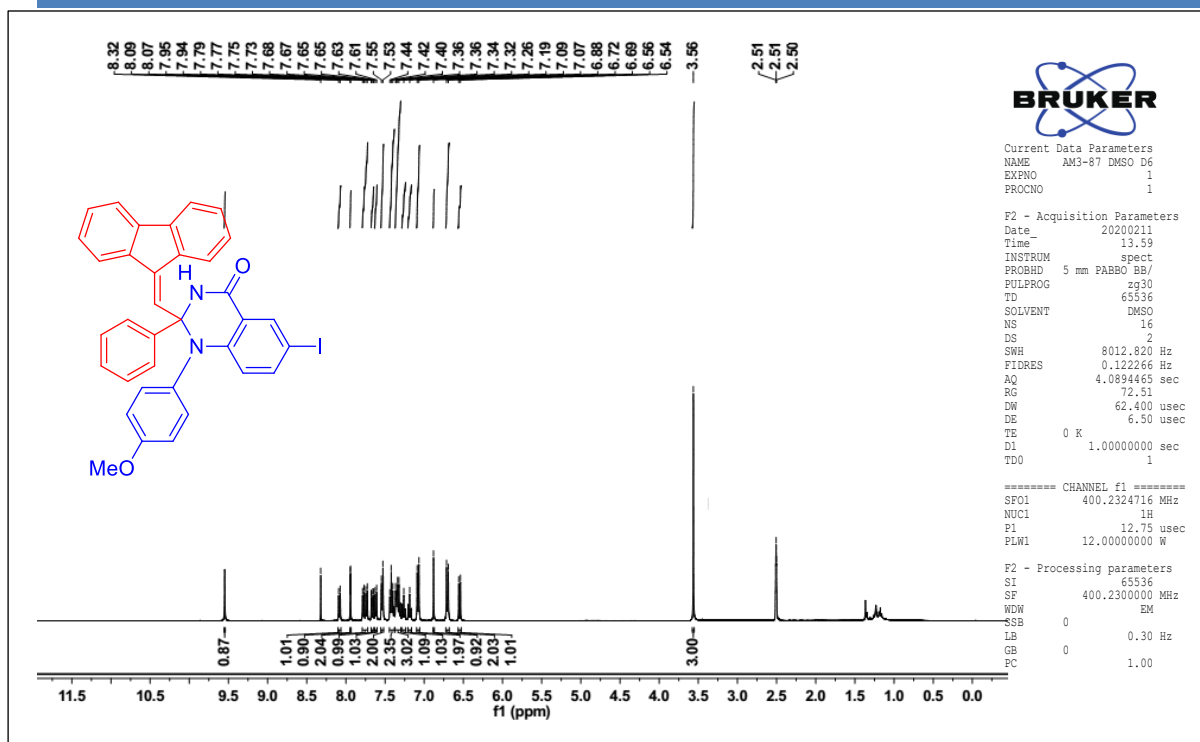Figure 37  $^1\text{H}$  NMR spectrum of compound 3j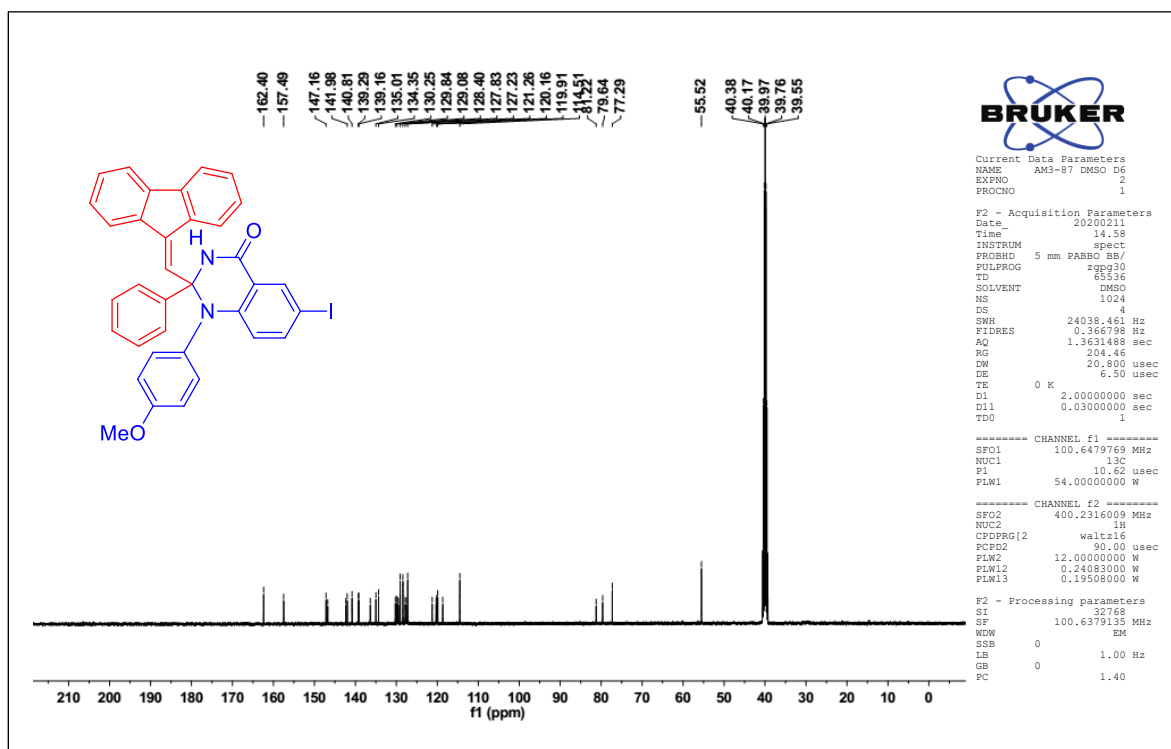Figure 38  $^{13}\text{C}$  NMR spectrum of compound 3j

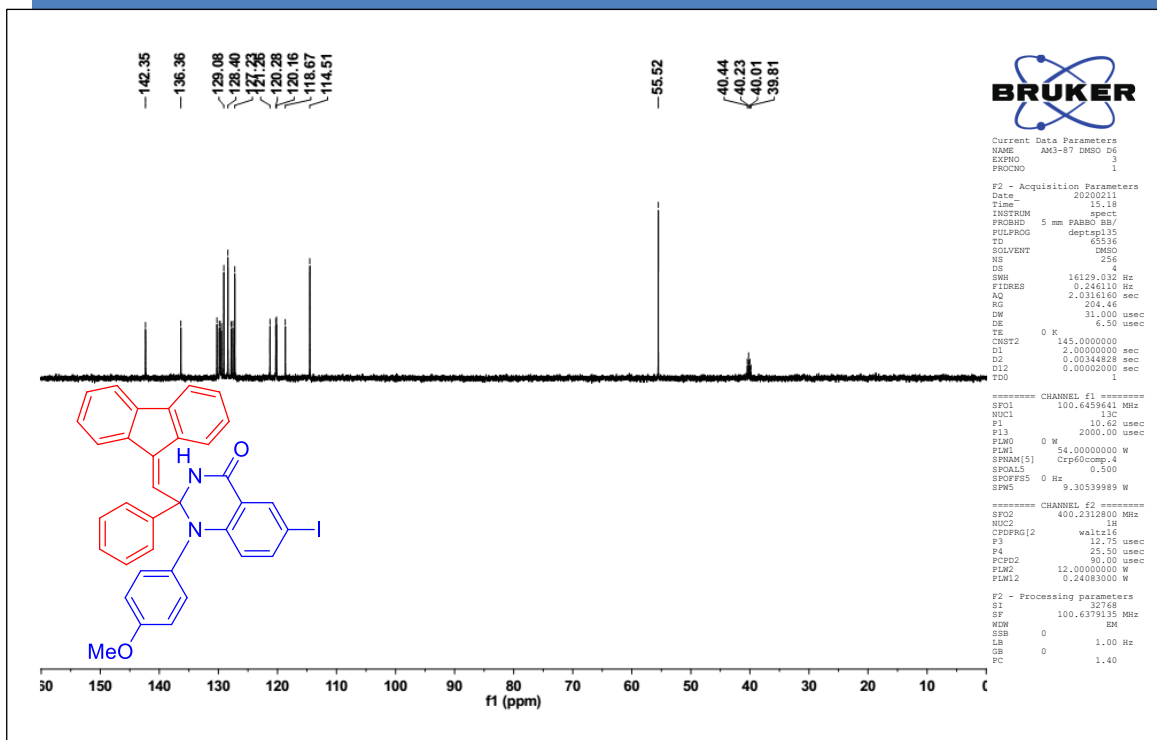

Figure 39 DEPT-135 NMR spectrum of compound 3j

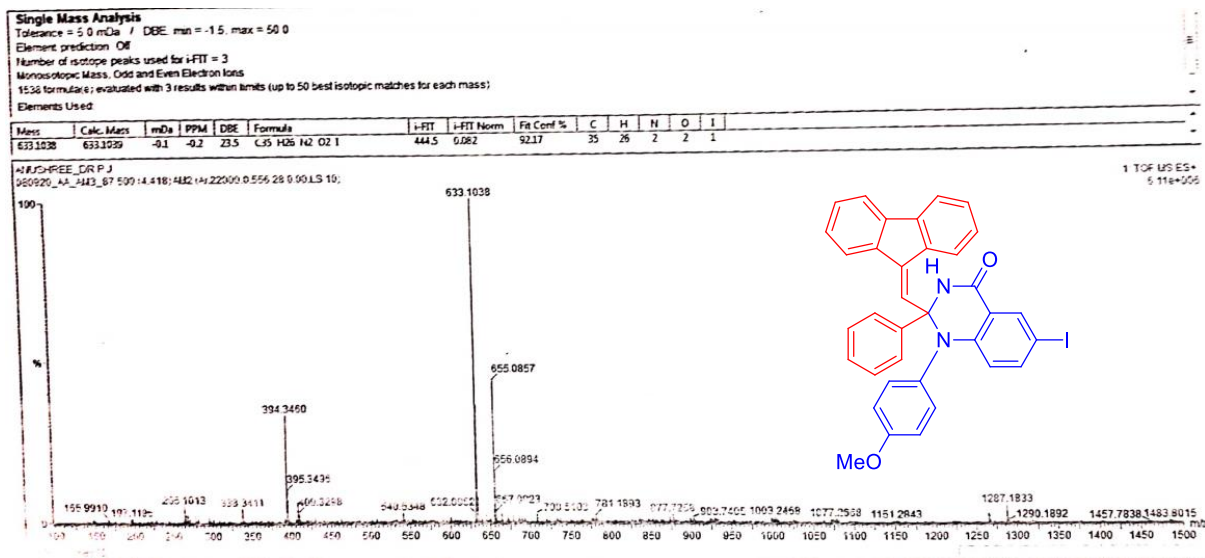

Figure 40 HRMS spectrum of compound 3j

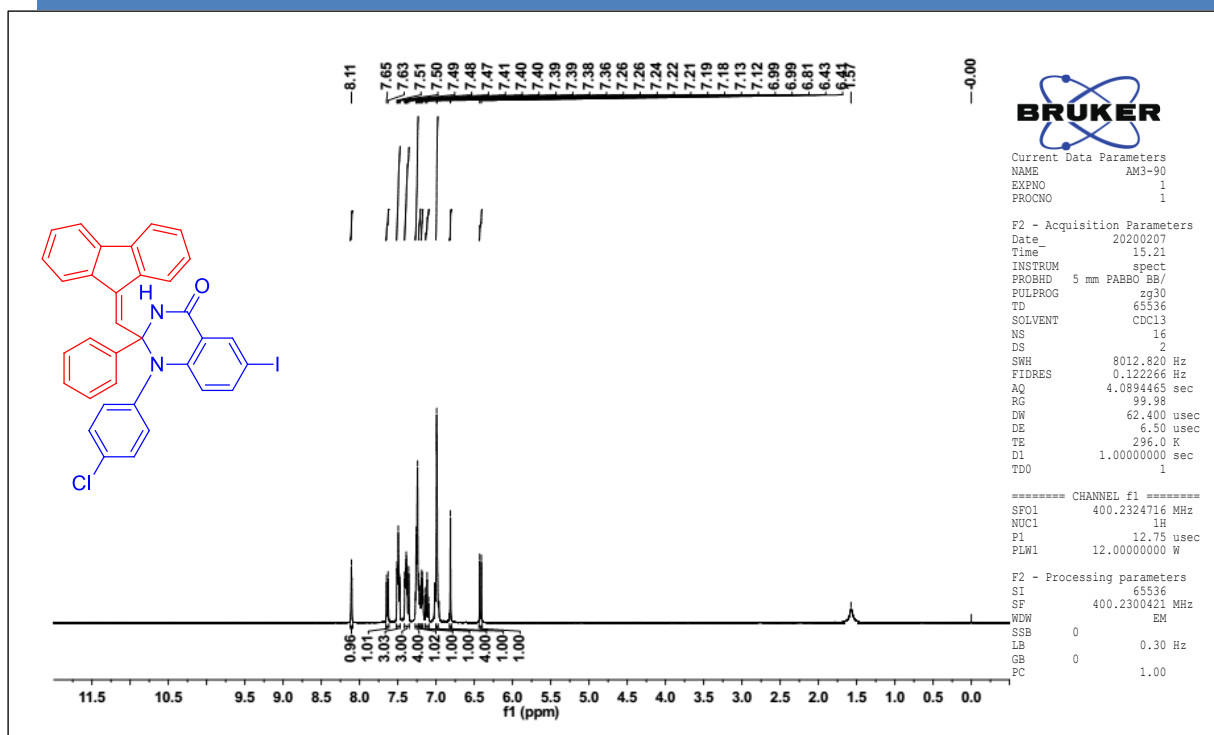Figure 41  $^1\text{H}$  NMR spectrum of compound **3k**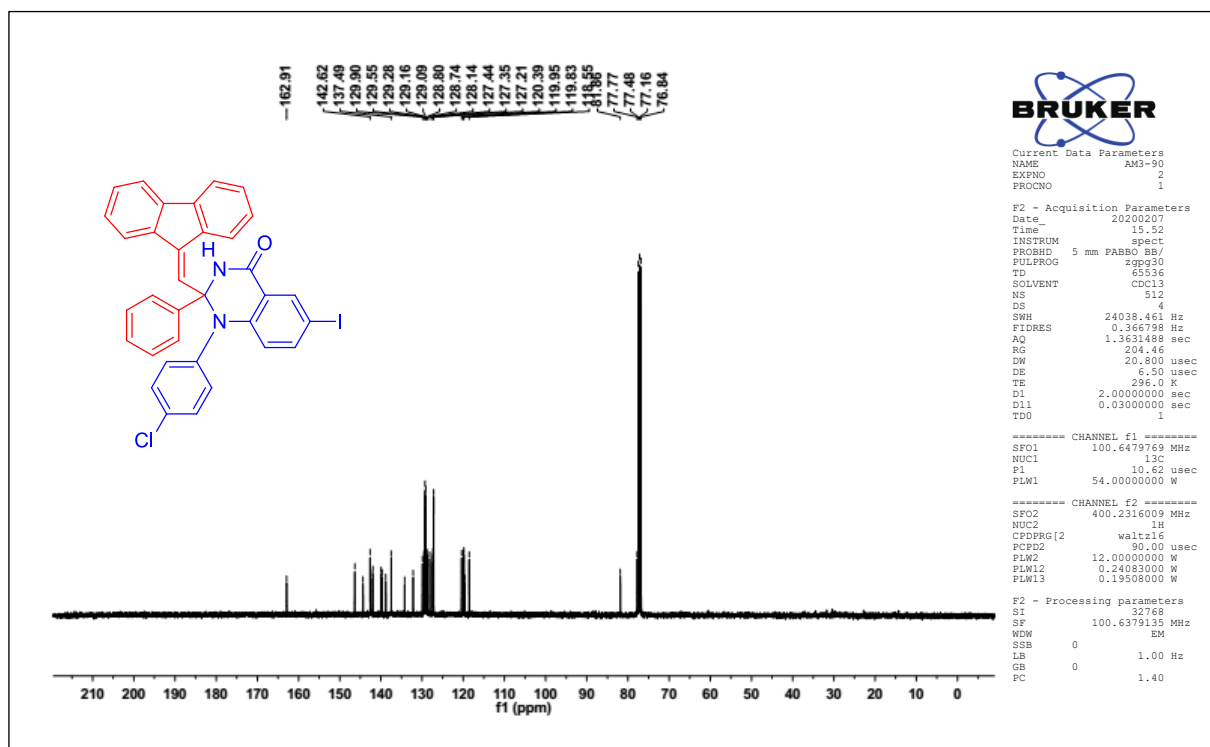Figure 42  $^{13}\text{C}$  NMR spectrum of compound **3k**

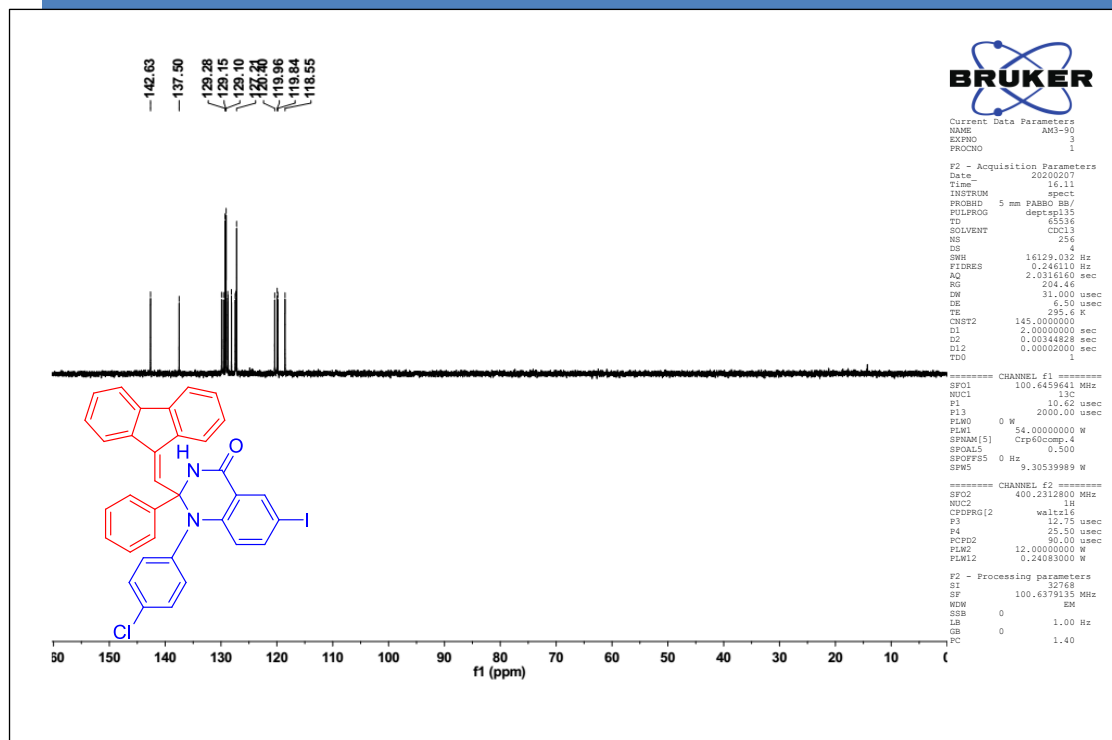Figure 43 DEPT-135 NMR spectrum of compound **3k**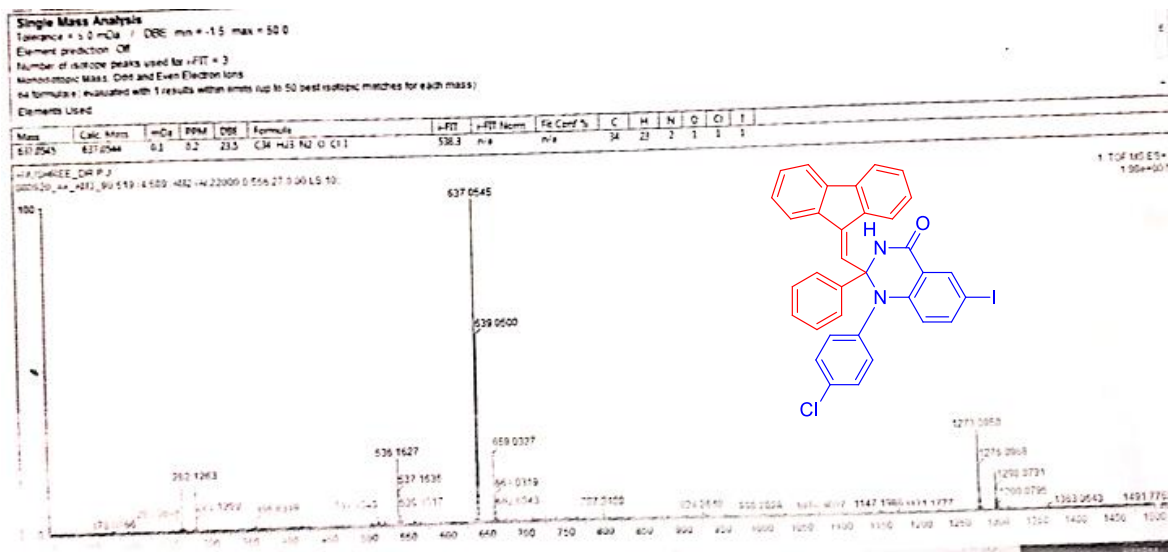Figure 44 HRMS spectrum of compound **3k**

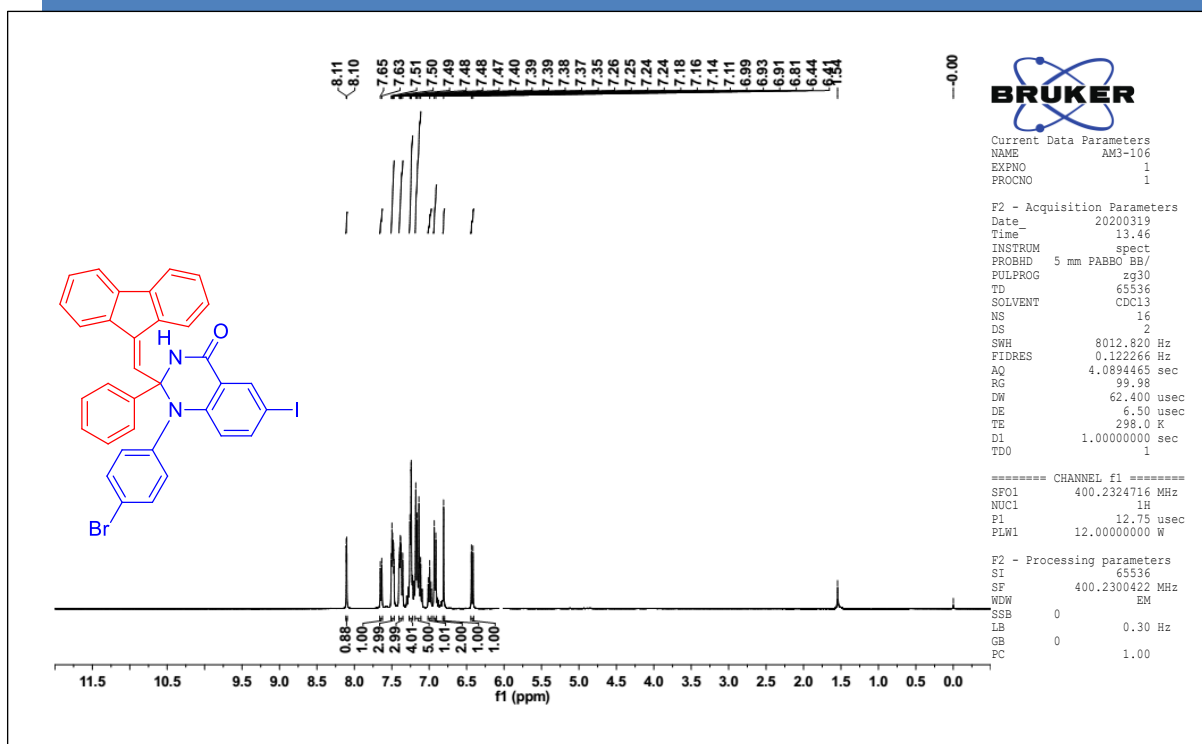Figure 45  $^1\text{H}$  NMR spectrum of compound 31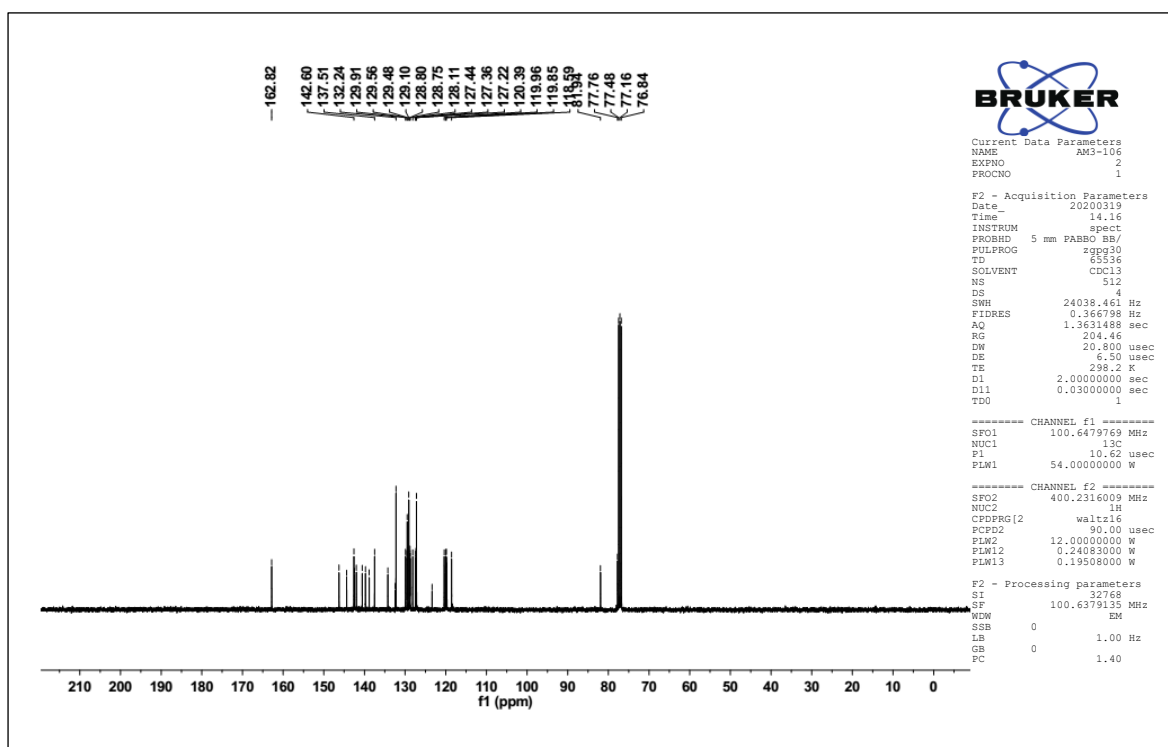Figure 46  $^{13}\text{C}$  NMR spectrum of compound 31



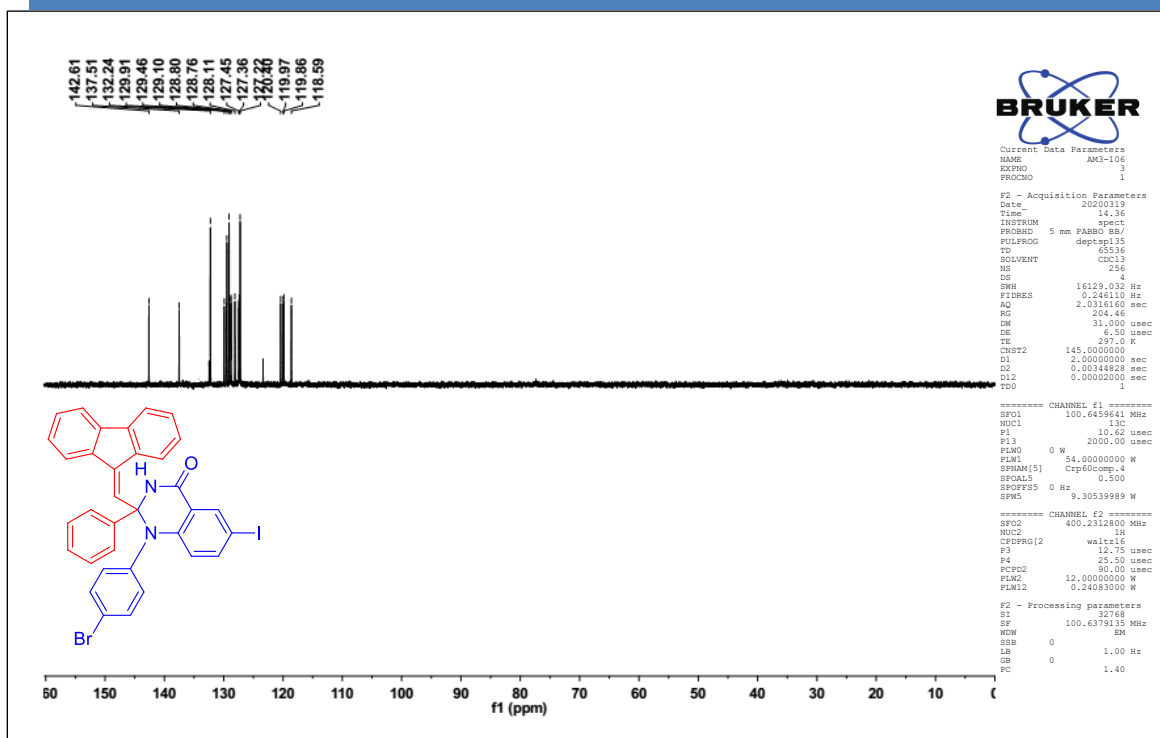

Figure 47 DEPT-135 NMR spectrum of compound 31

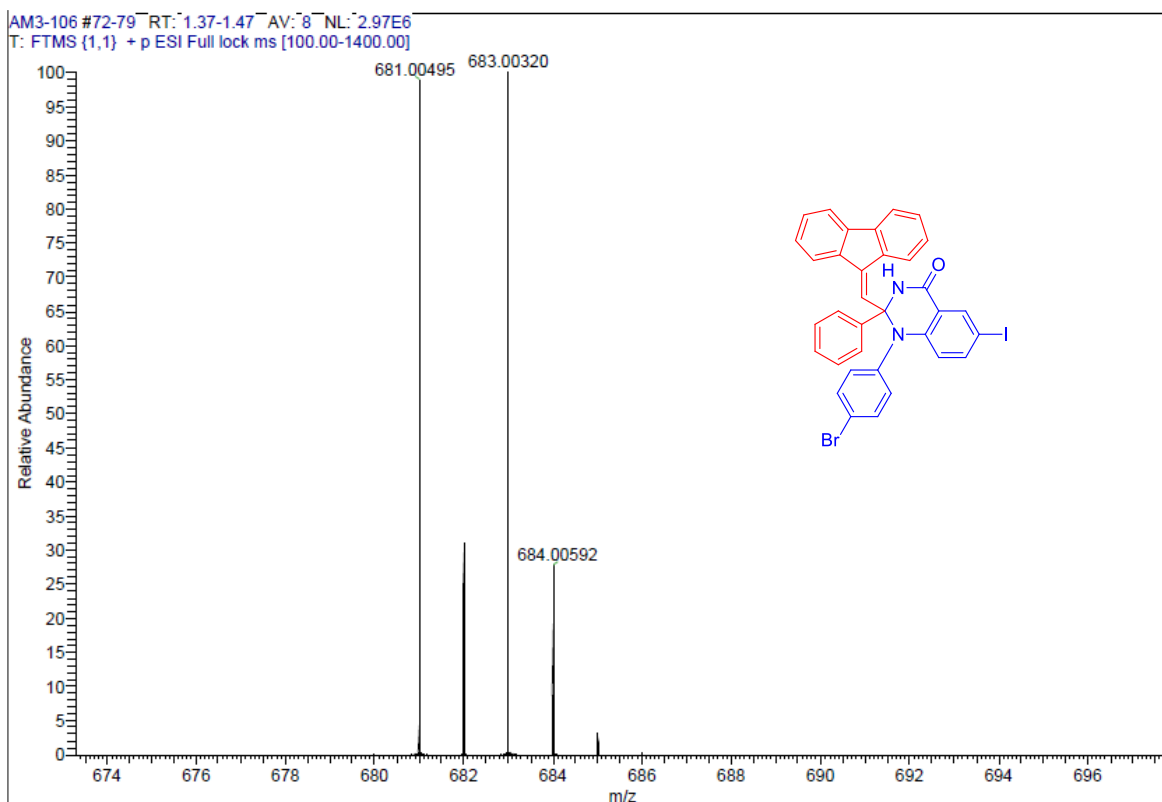

Figure 48 HRMS spectrum of compound 31

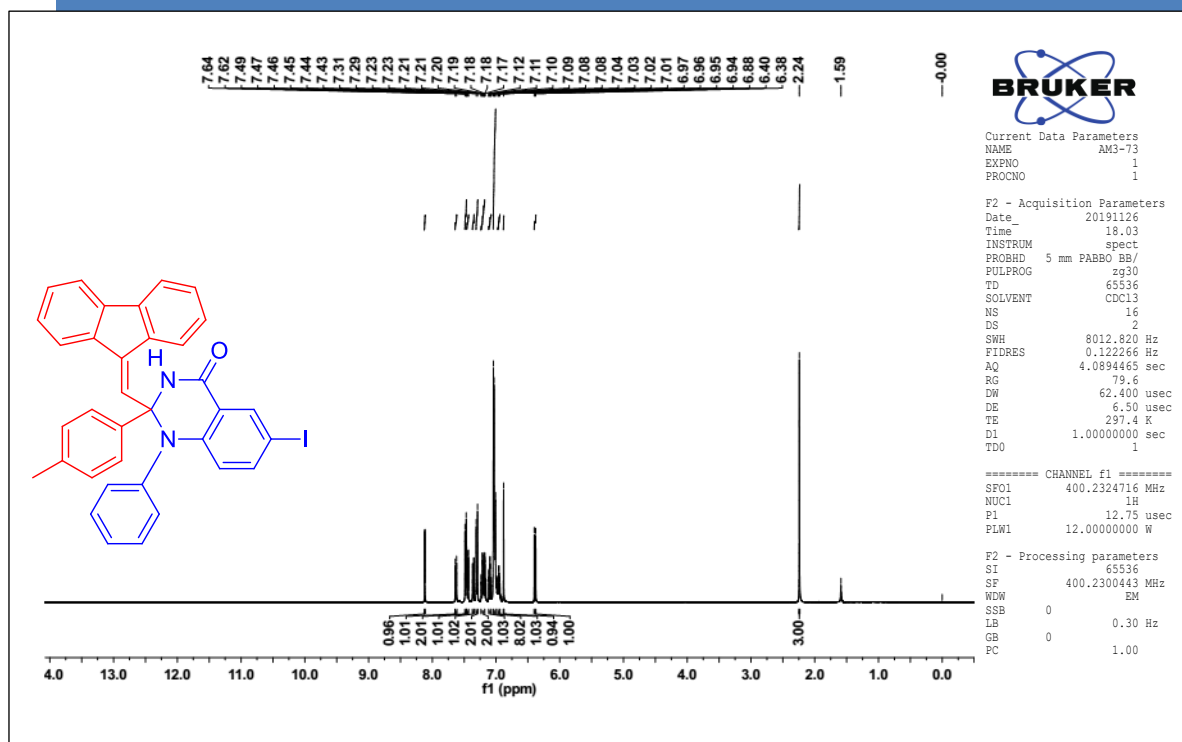

**Figure 49 <sup>1</sup>H NMR spectrum of compound 3m**

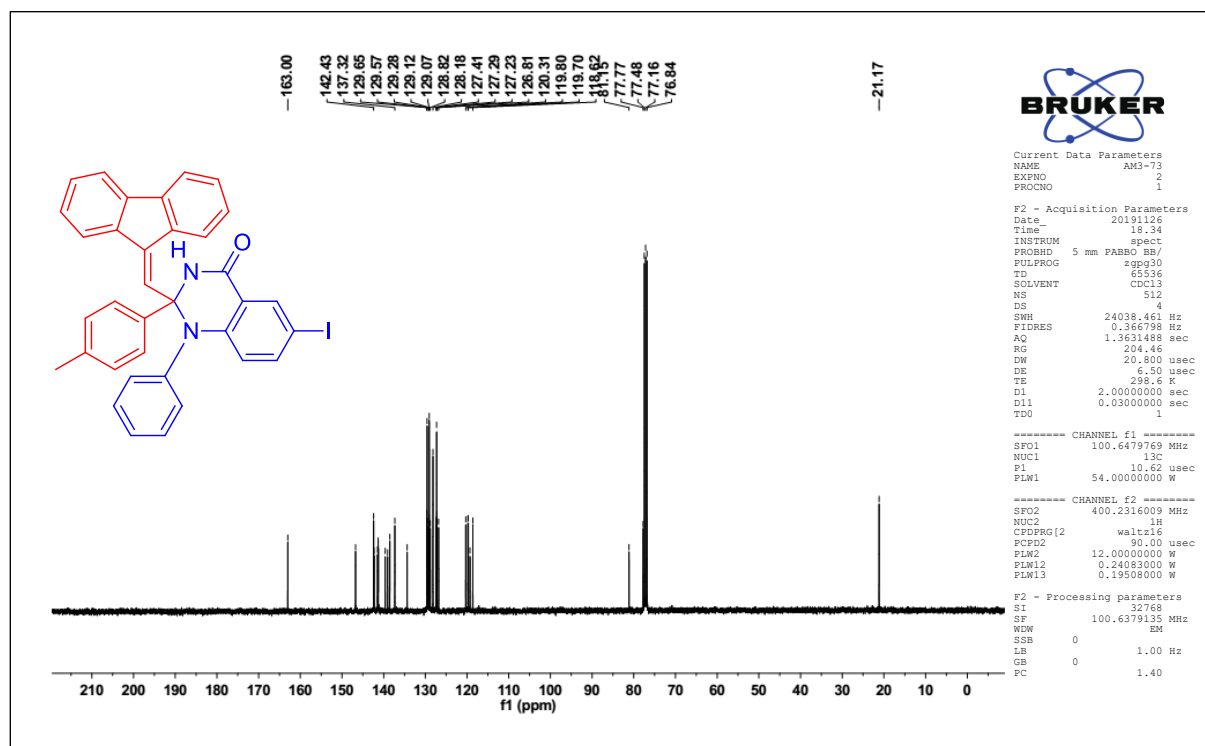

**Figure 50 <sup>13</sup>C NMR spectrum of compound 3m**

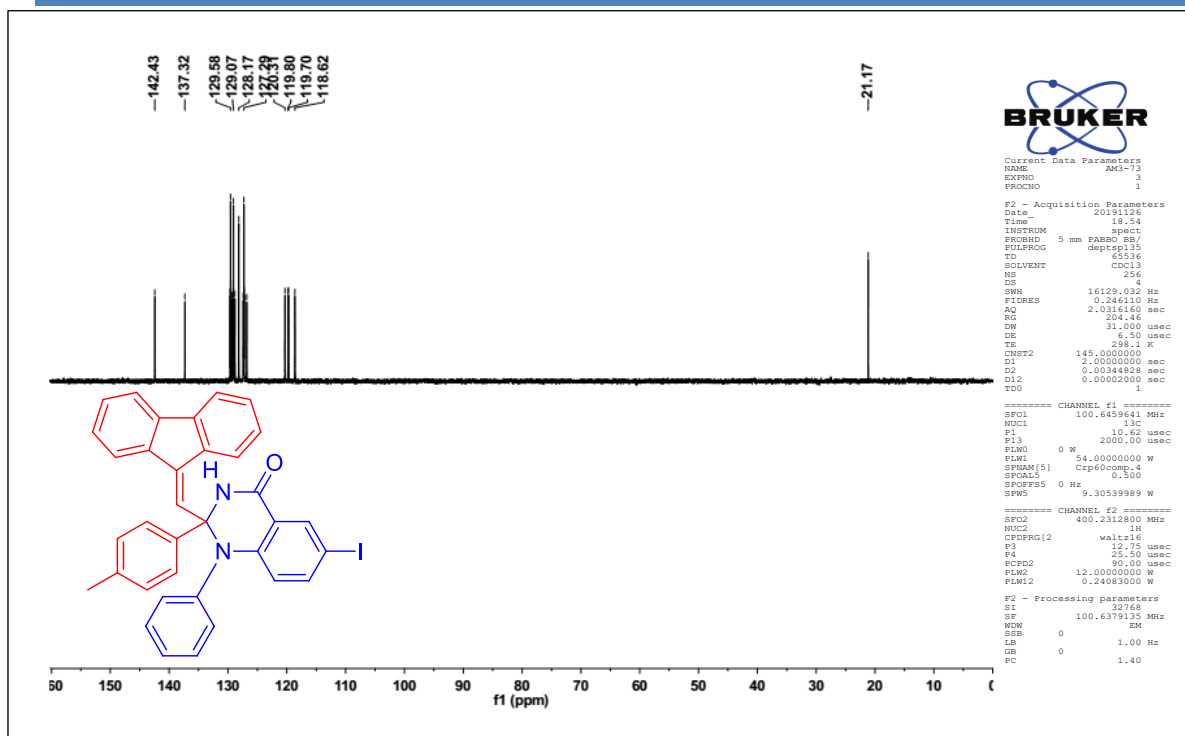Figure 51 DEPT-135 NMR spectrum of compound **3m**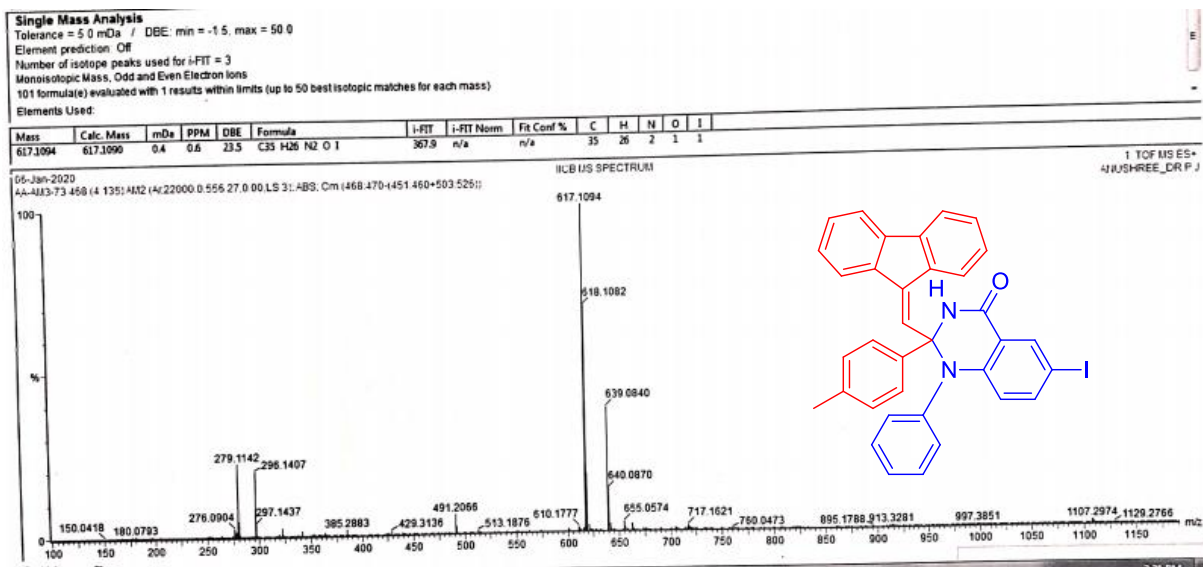Figure 52 HRMS spectrum of compound **3m**



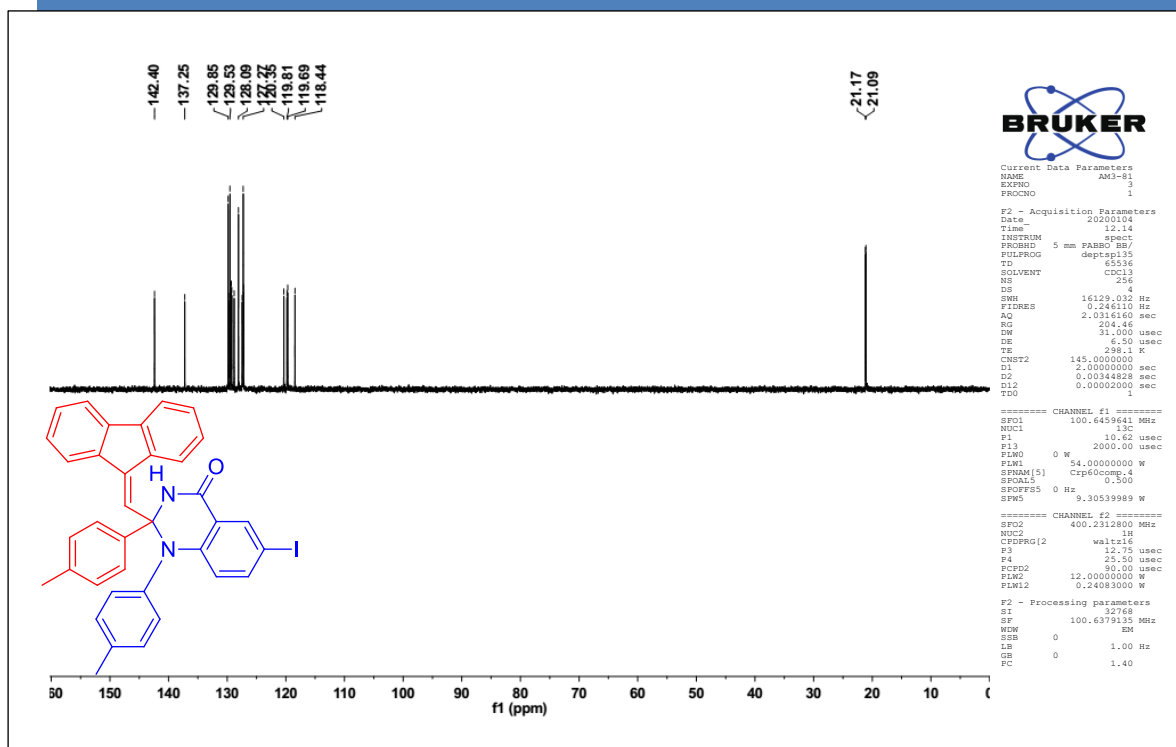

Figure 55 DEPT-135 NMR spectrum of compound 3n

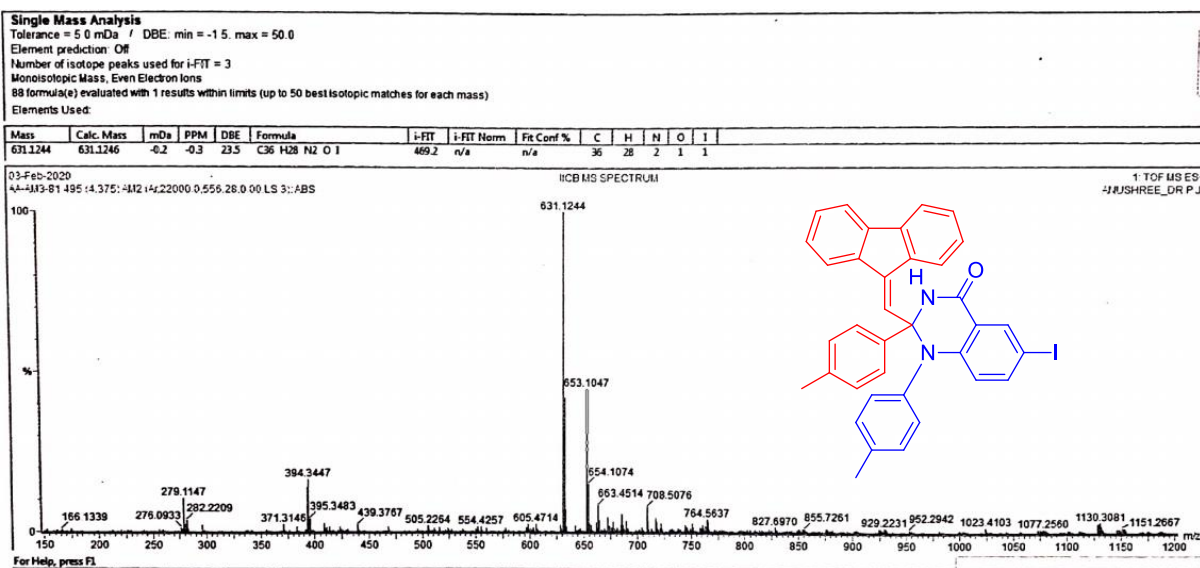

Figure 56 HRMS spectrum of compound 3n

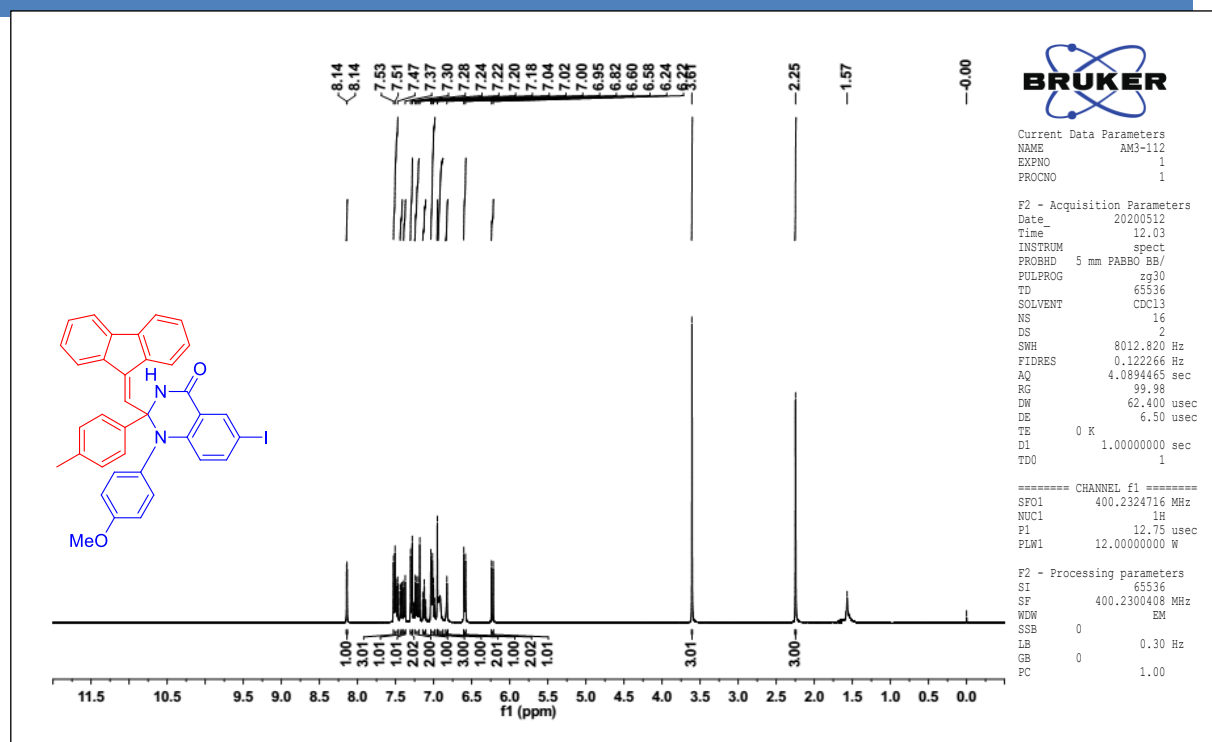Figure 57  $^1\text{H}$  NMR spectrum of compound **30**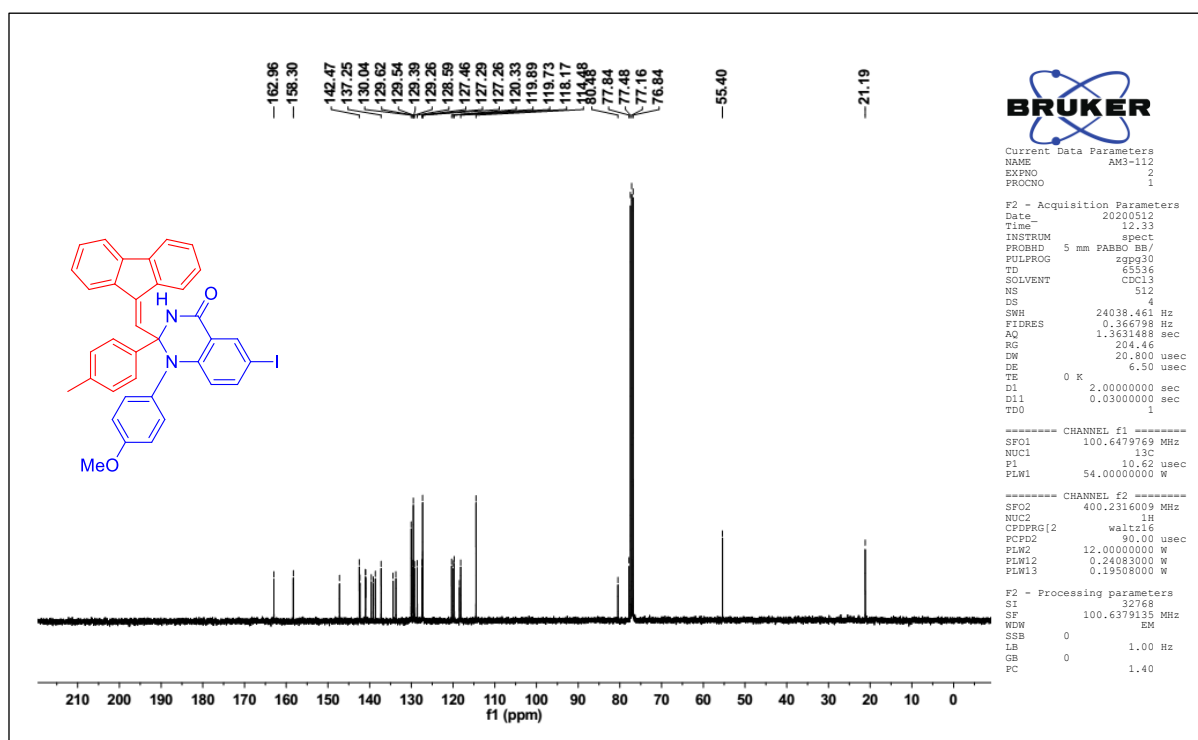Figure 58  $^{13}\text{C}$  NMR spectrum of compound **30**

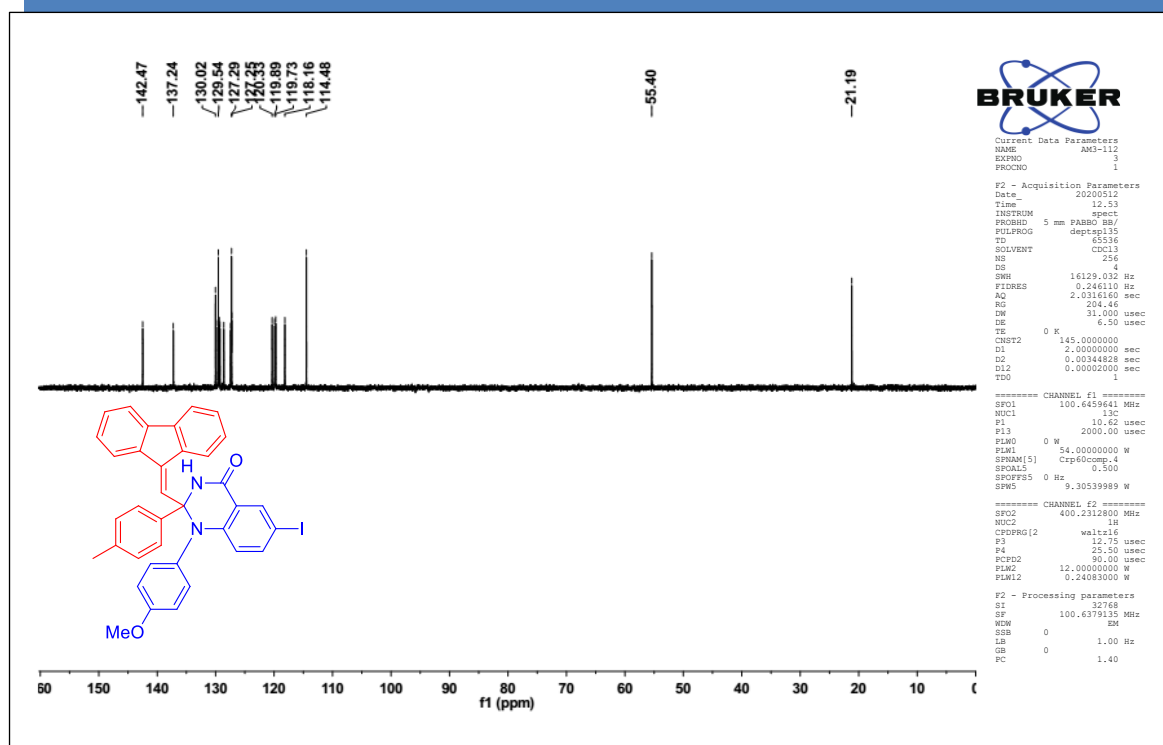

Figure 59 DEPT-135 NMR spectrum of compound 30

AM3-112 #79-92 RT: 1.48-1.66 AV: 14 NL: 1.02E7  
 T: FTMS {1,1} + p ESI Full lock ms [100.00-1400.00]

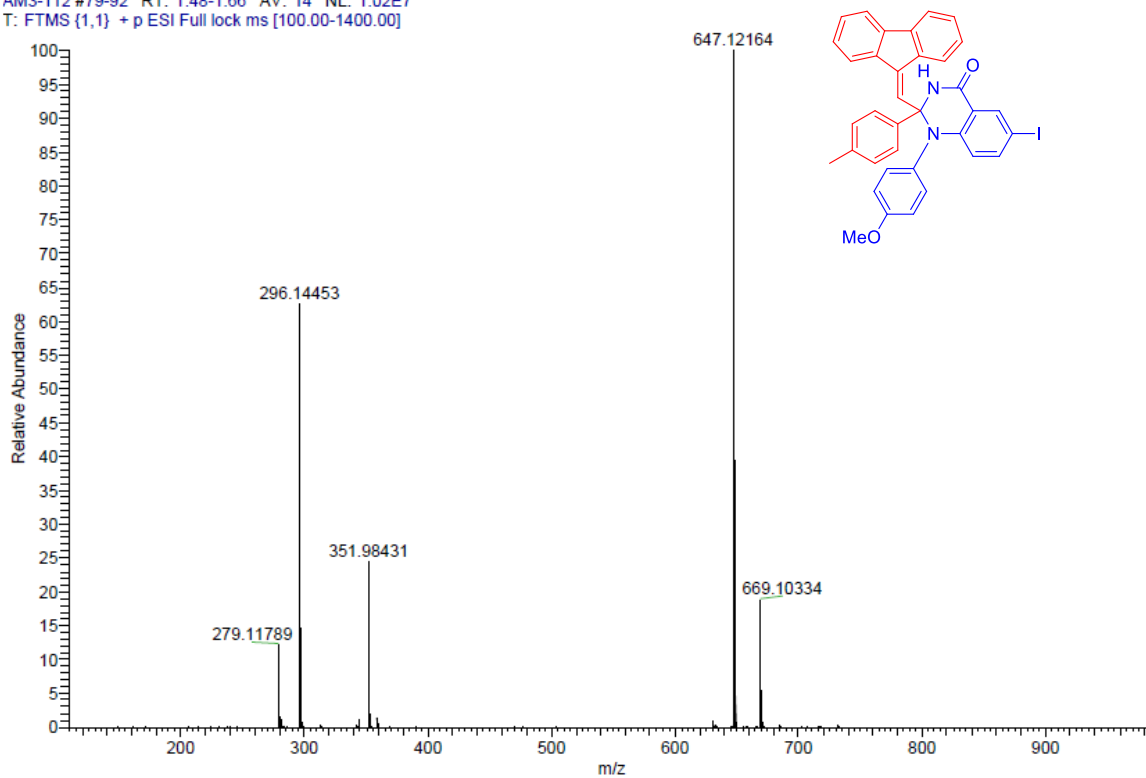

Figure 60 HRMS spectrum of compound 30

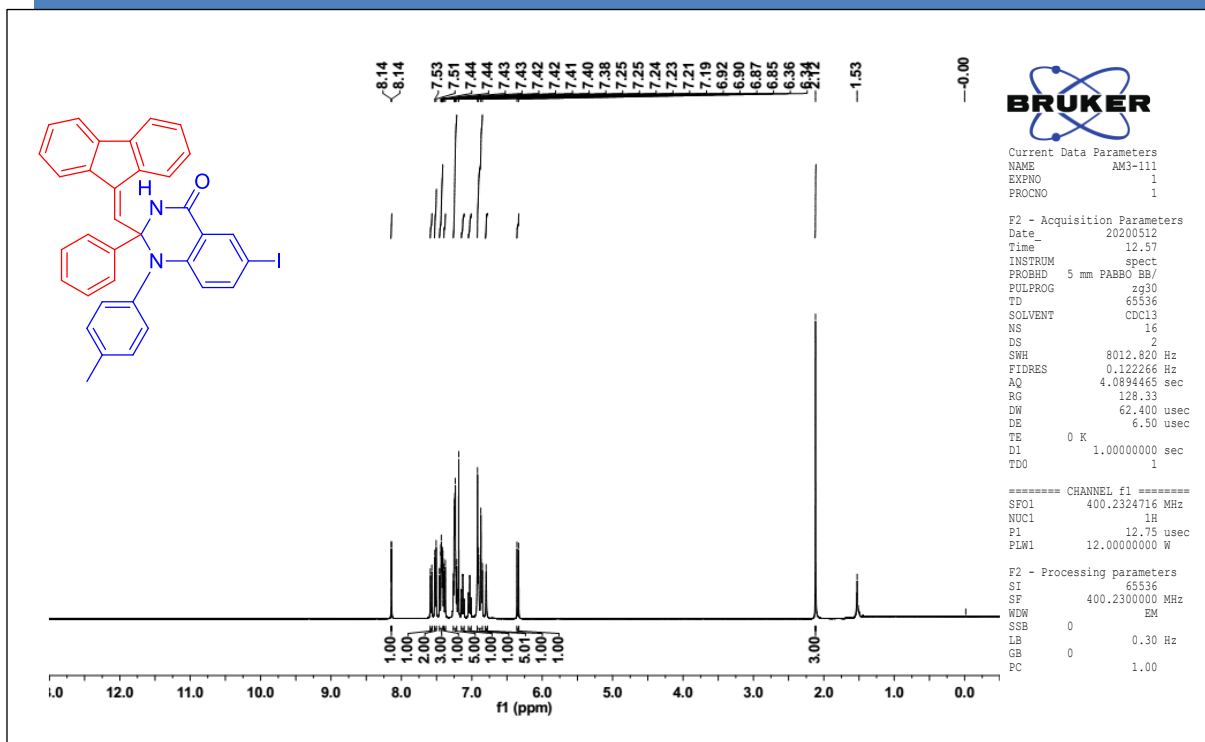

**Figure 61**  $^1\text{H}$  NMR spectrum of compound **3p**

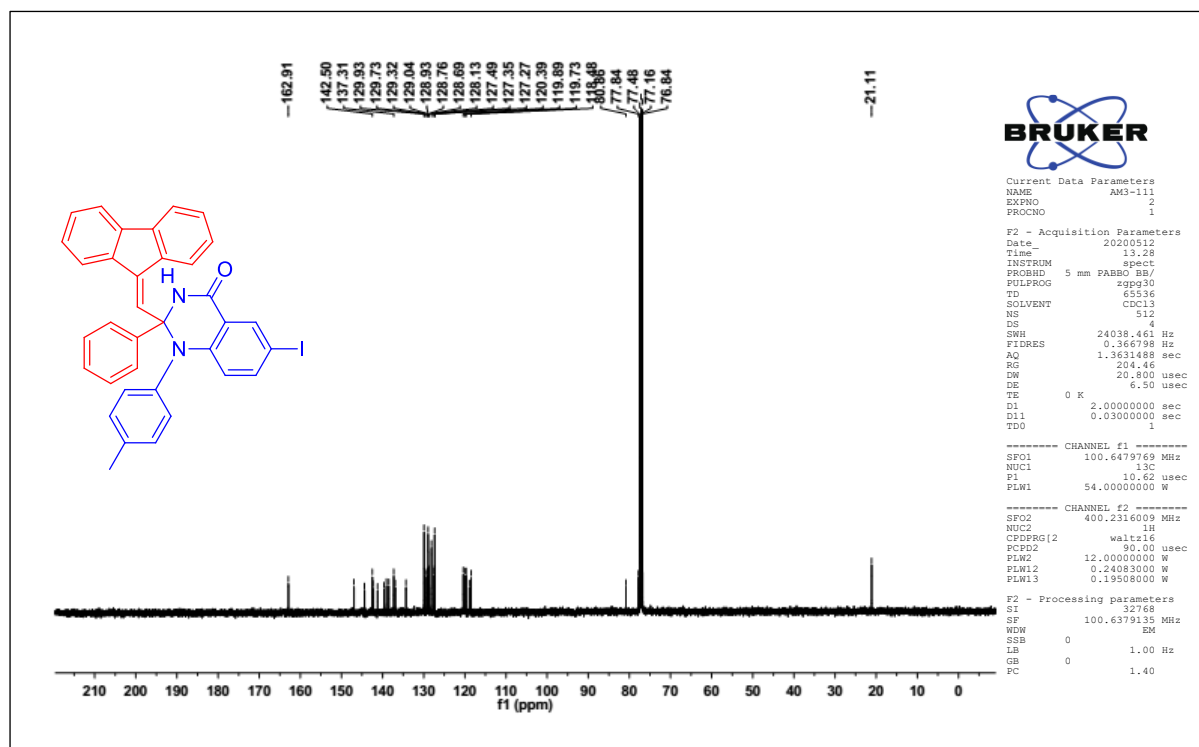

**Figure 62**  $^{13}\text{C}$  NMR spectrum of compound **3p**



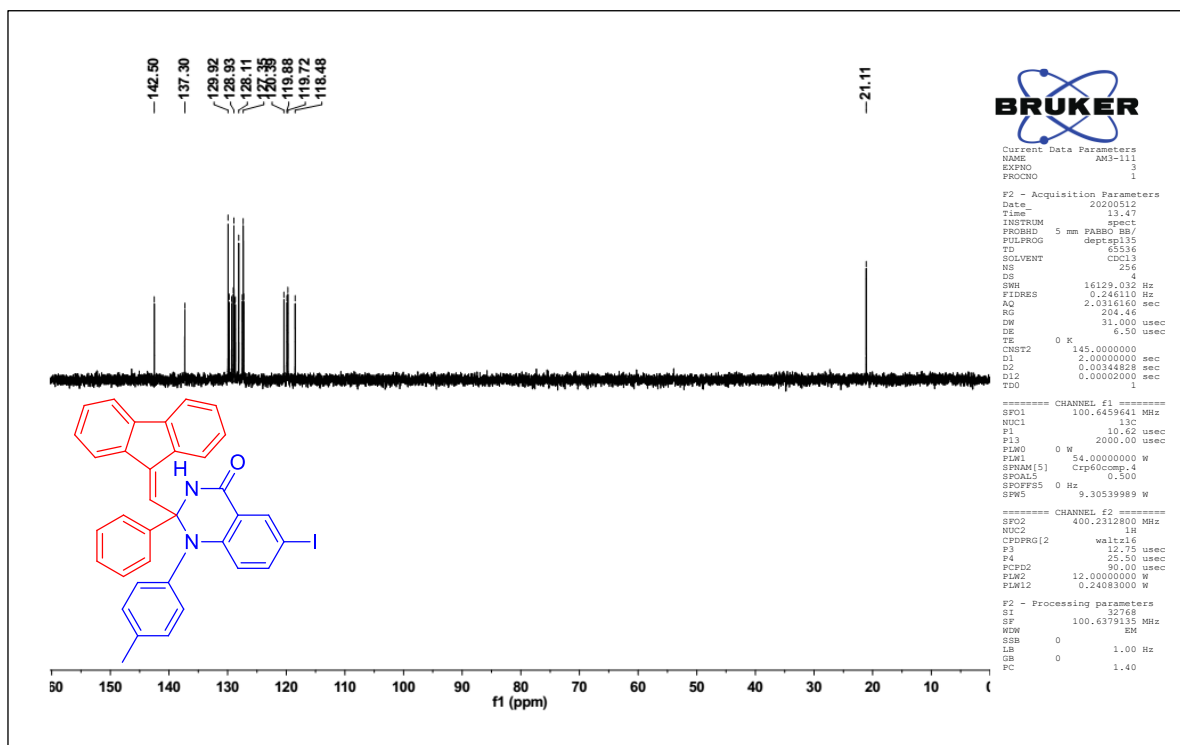

Figure 63 DEPT-135 NMR spectrum of compound 3p

AM3-111 #69-79 RT: 1.35-1.49 AV: 11 NL: 5.04E6  
T: FTMS (1,1) + p ESI Full lock ms [100.00-1400.00]

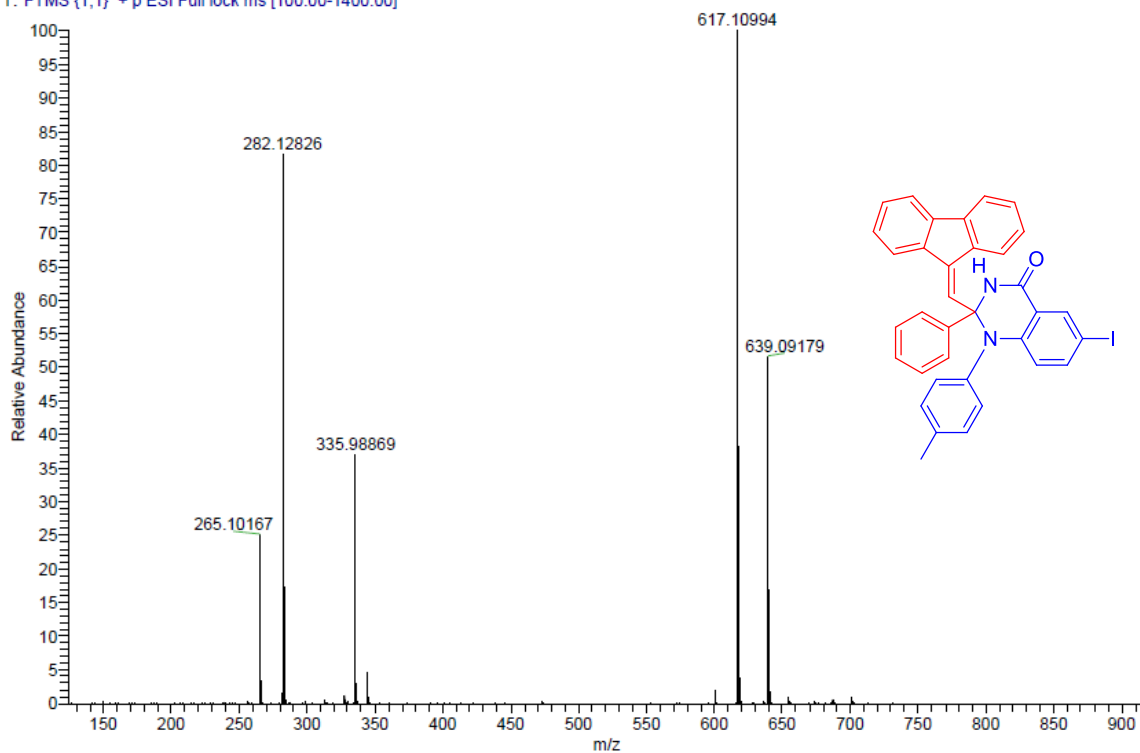

Figure 64 HRMS spectrum of compound 3p

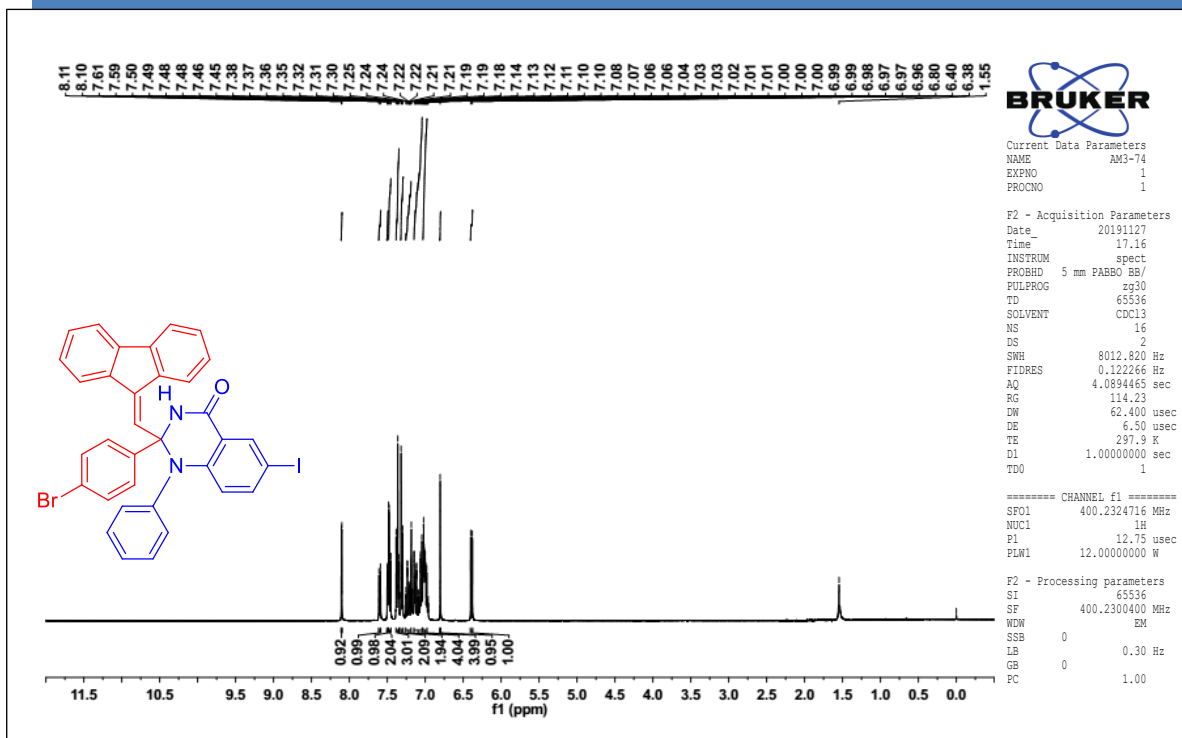

**Figure 65**  $^1\text{H}$  NMR spectrum of compound **3q**

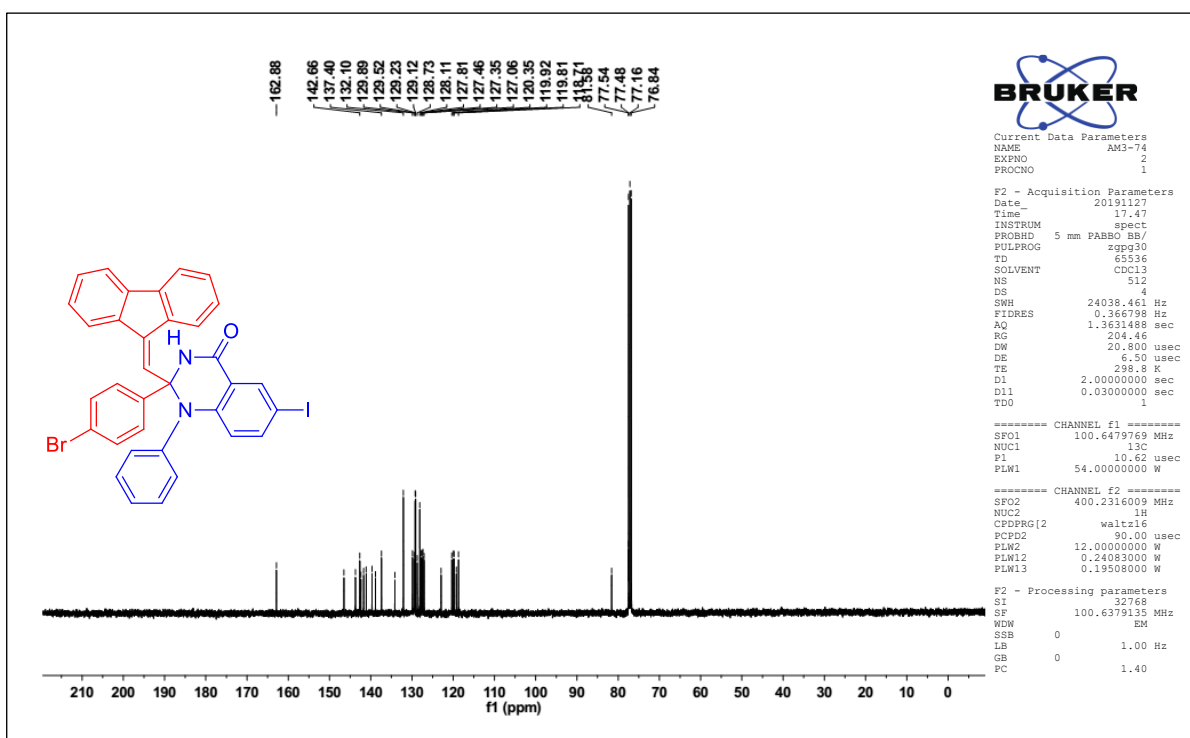

**Figure 66**  $^{13}\text{C}$  NMR spectrum of compound **3q**

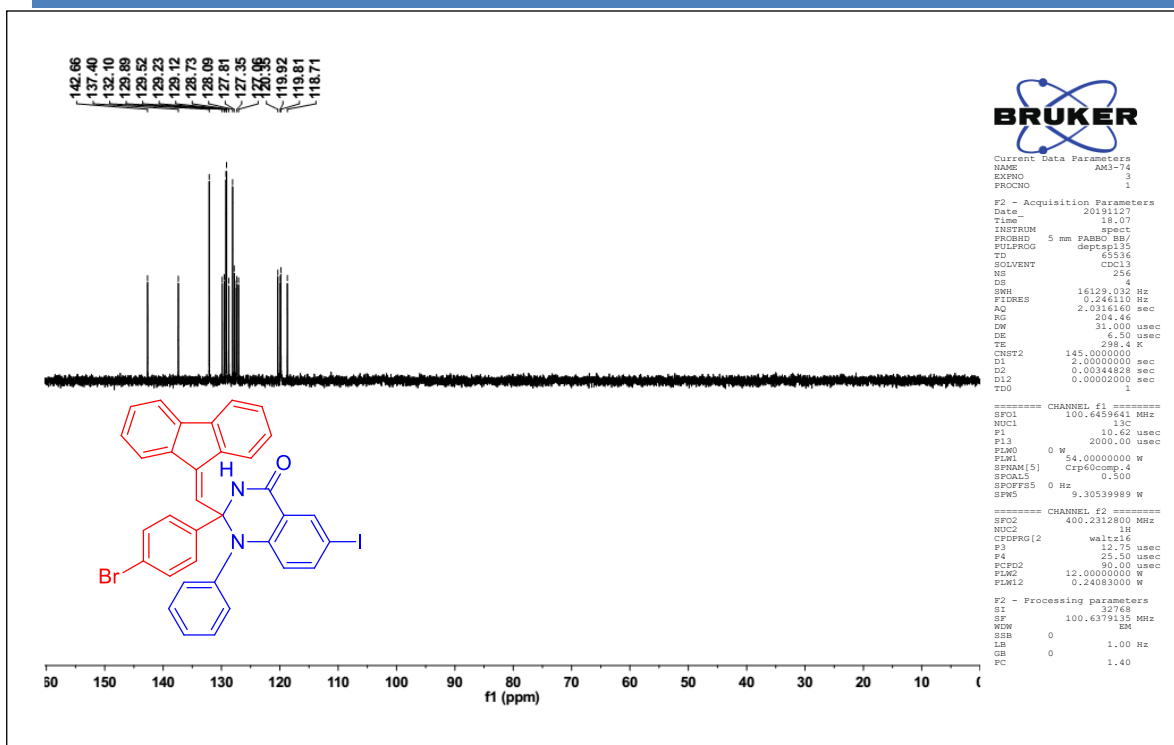

Figure 67 DEPT-135 NMR spectrum of compound 3q

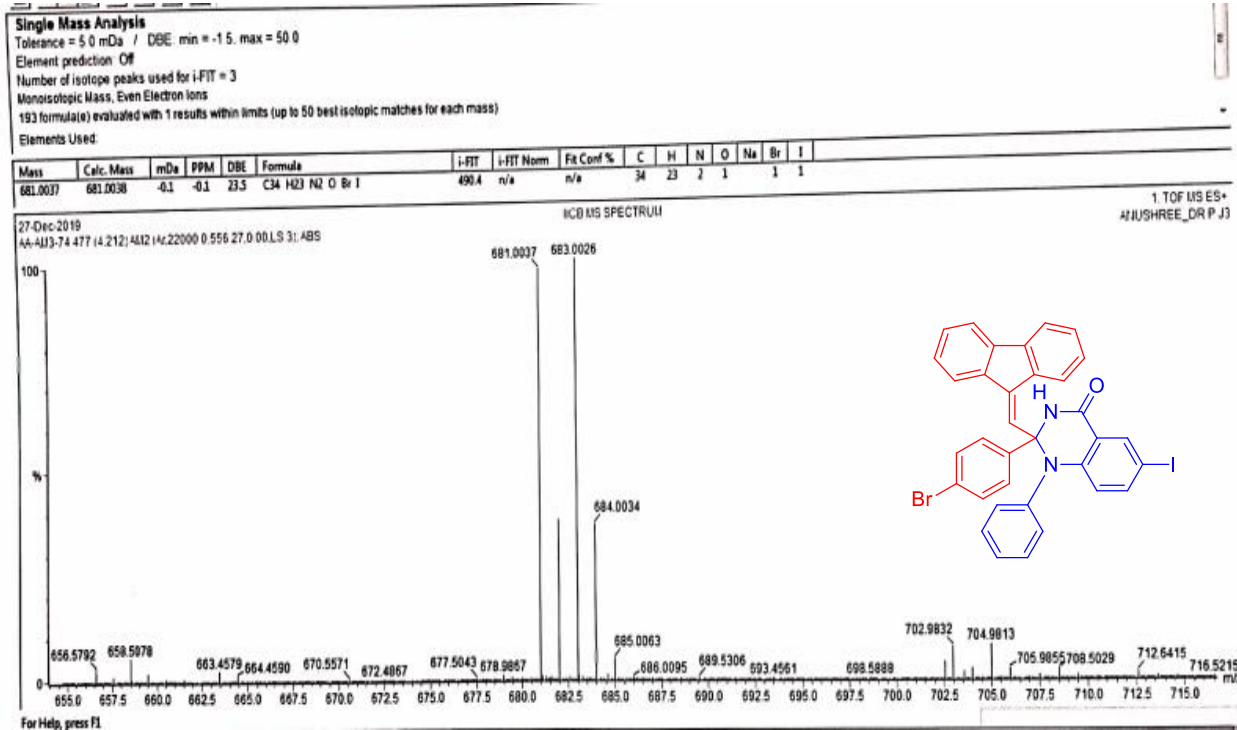

Figure 68 HRMS spectrum of compound 3q

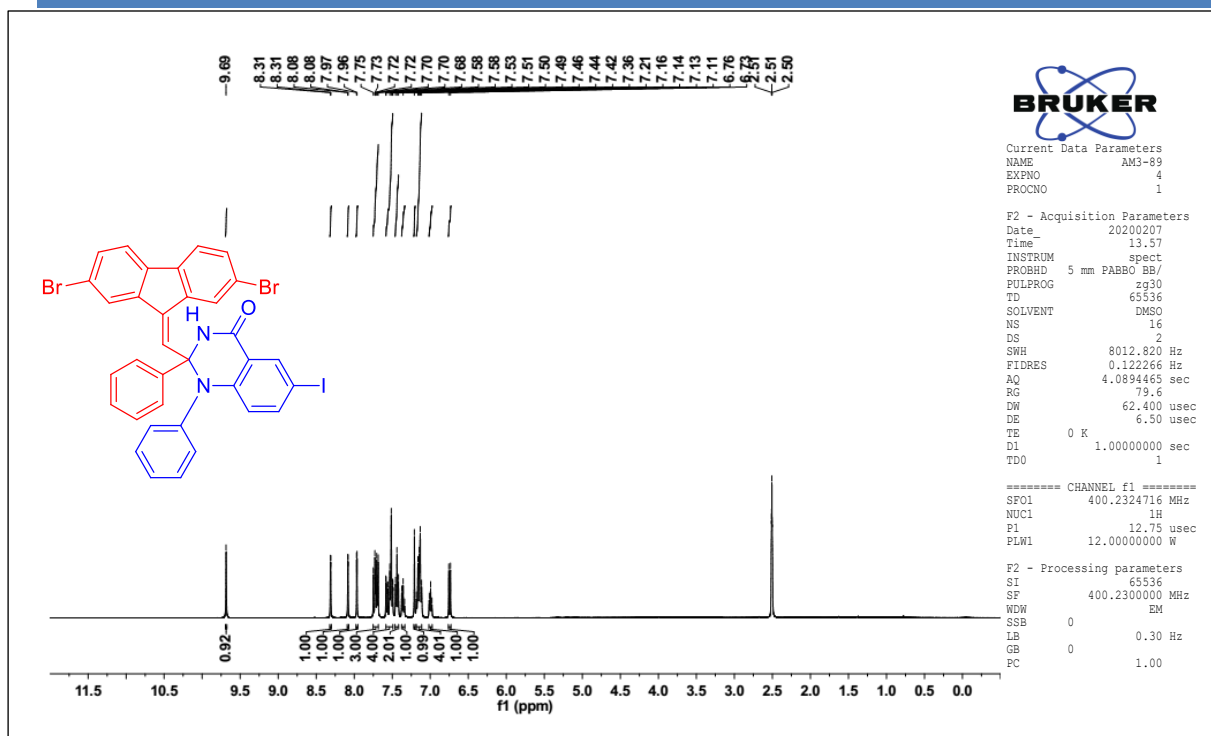Figure 69  $^1\text{H}$  NMR spectrum of compound **3r**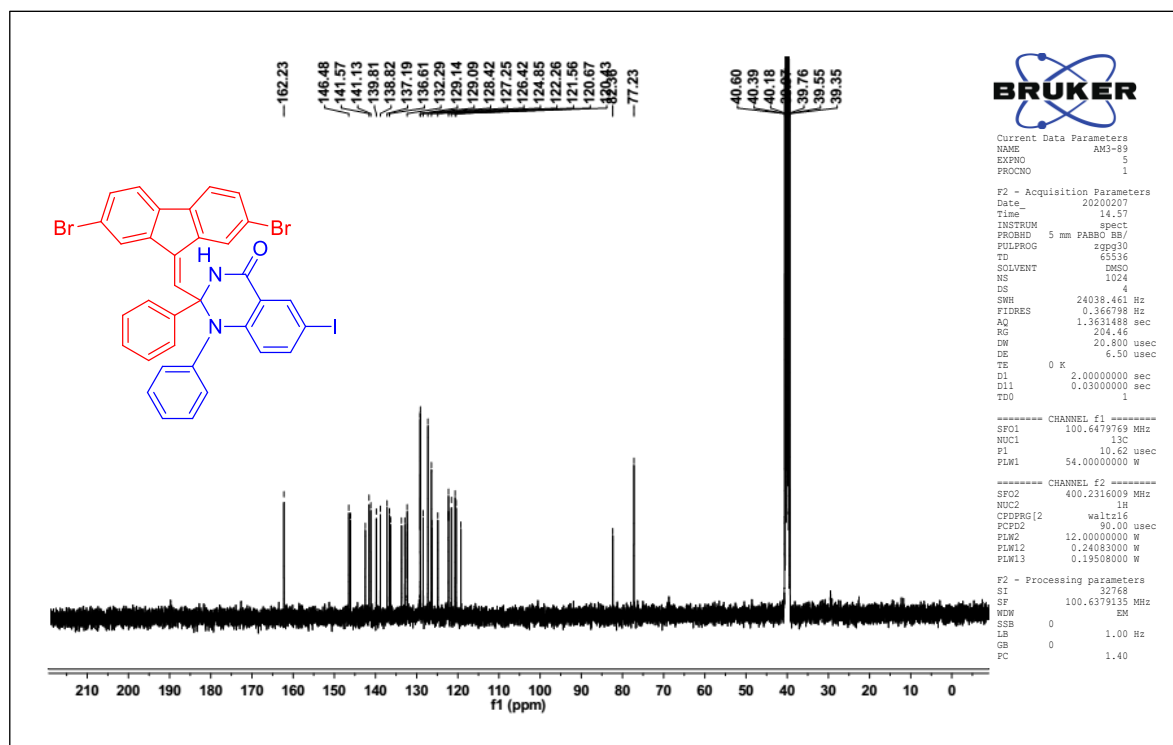Figure 70  $^{13}\text{C}$  NMR spectrum of compound **3r**

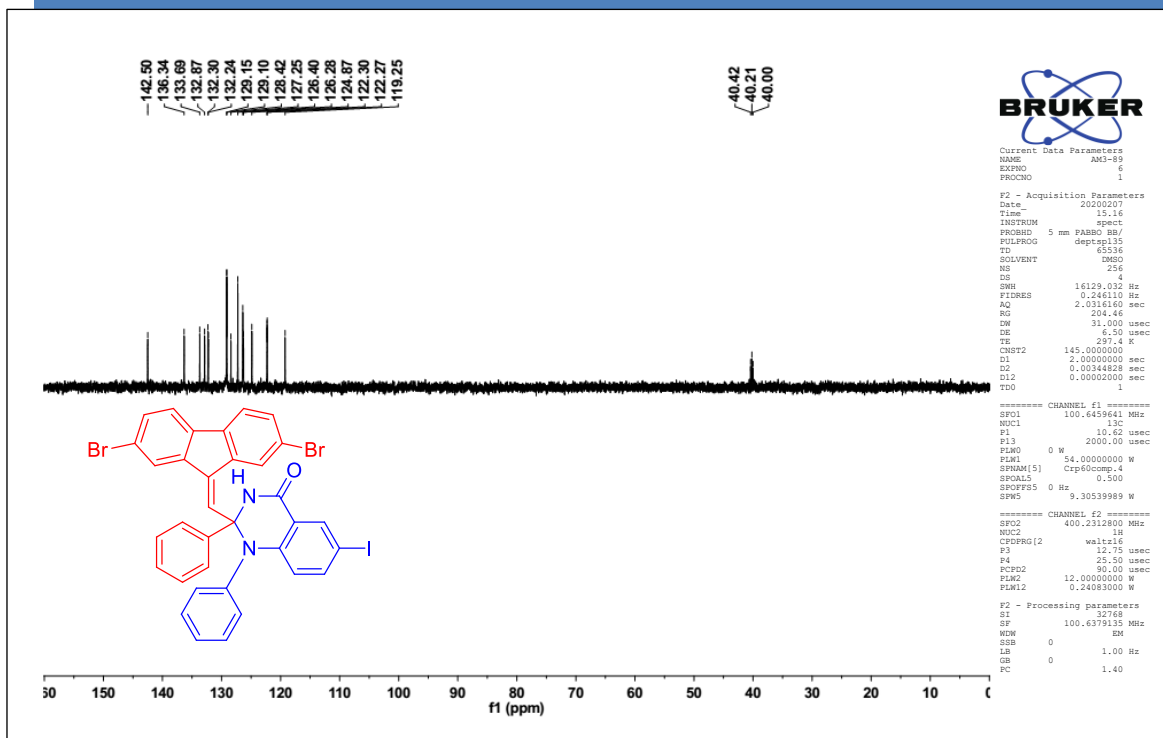

Figure 71 DEPT-135 NMR spectrum of compound 3r

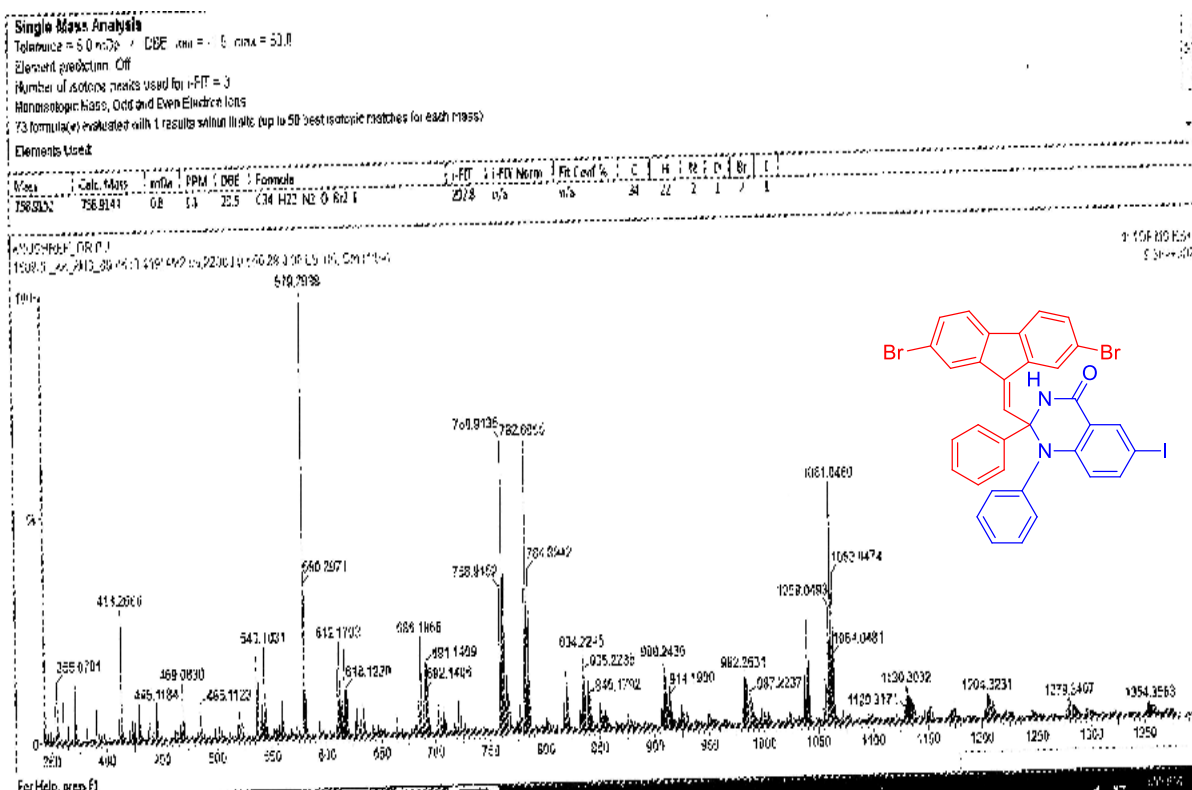

Figure 72 HRMS spectrum of compound 3r

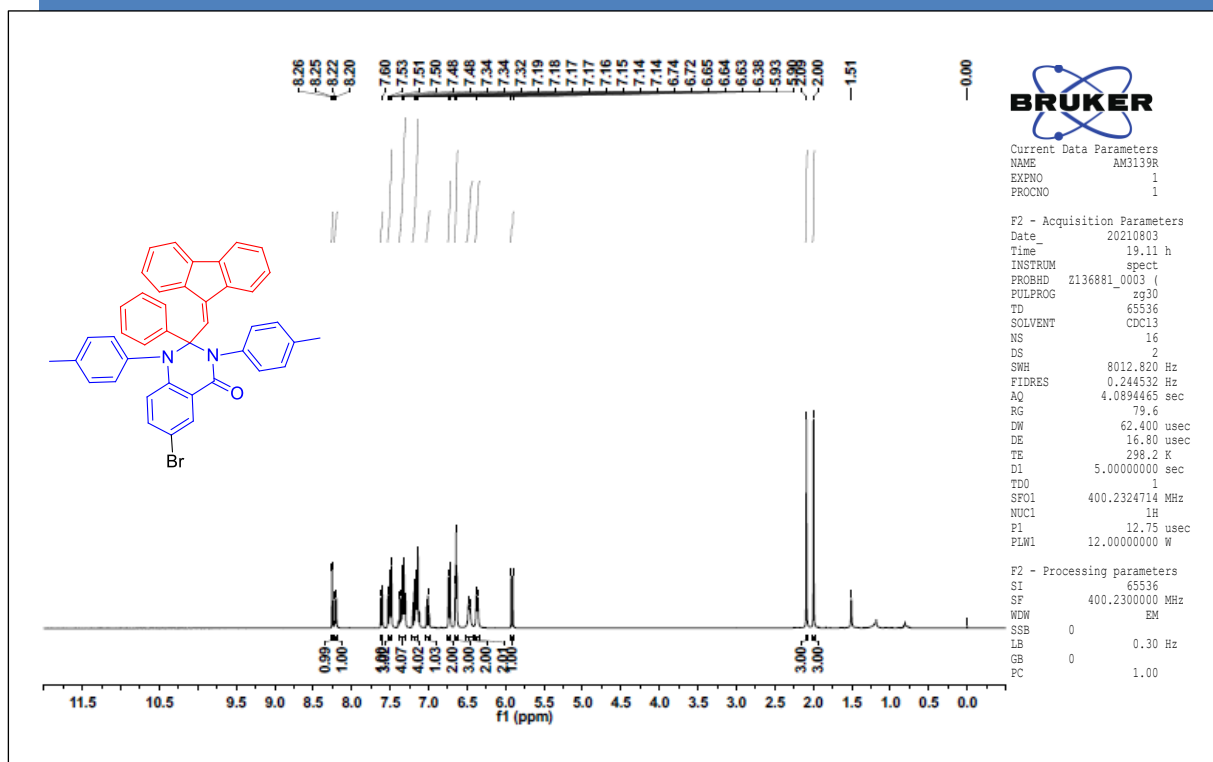

**Figure 73**  $^1\text{H}$  NMR spectrum of compound 4a

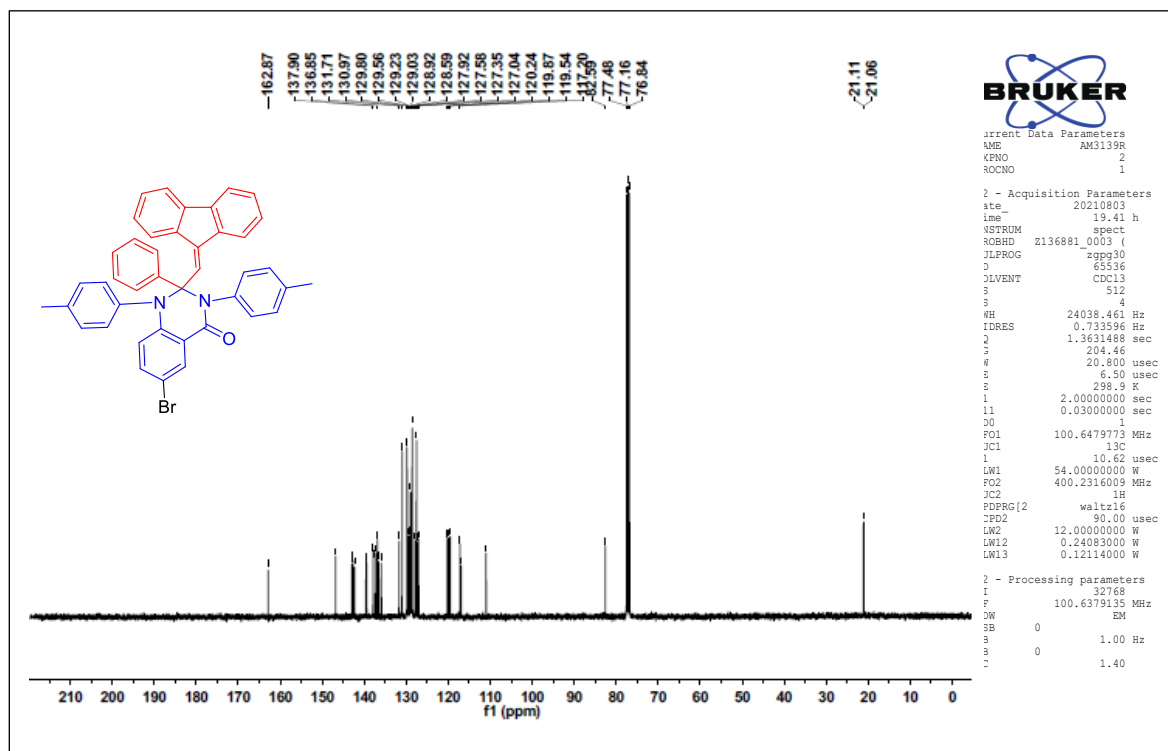

**Figure 74**  $^{13}\text{C}$  NMR spectrum of compound 4a

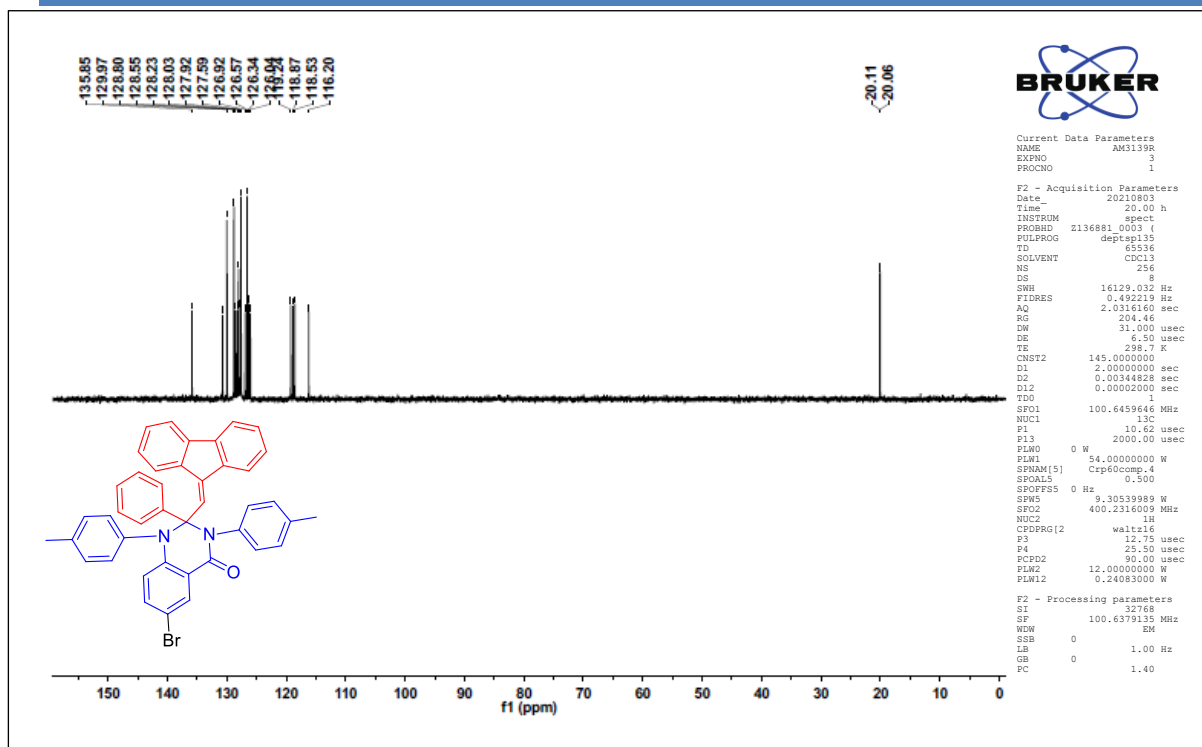Figure 75 DEPT-135 NMR spectrum of compound **4a**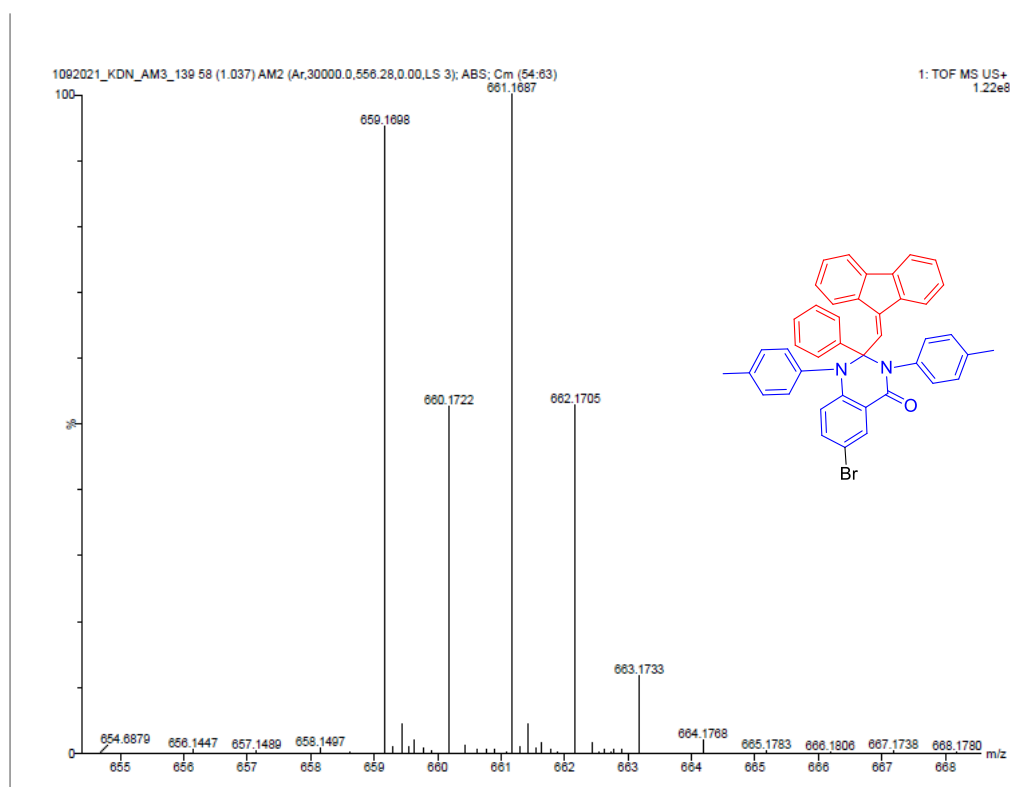Figure 76 HRMS spectrum of compound **4a**

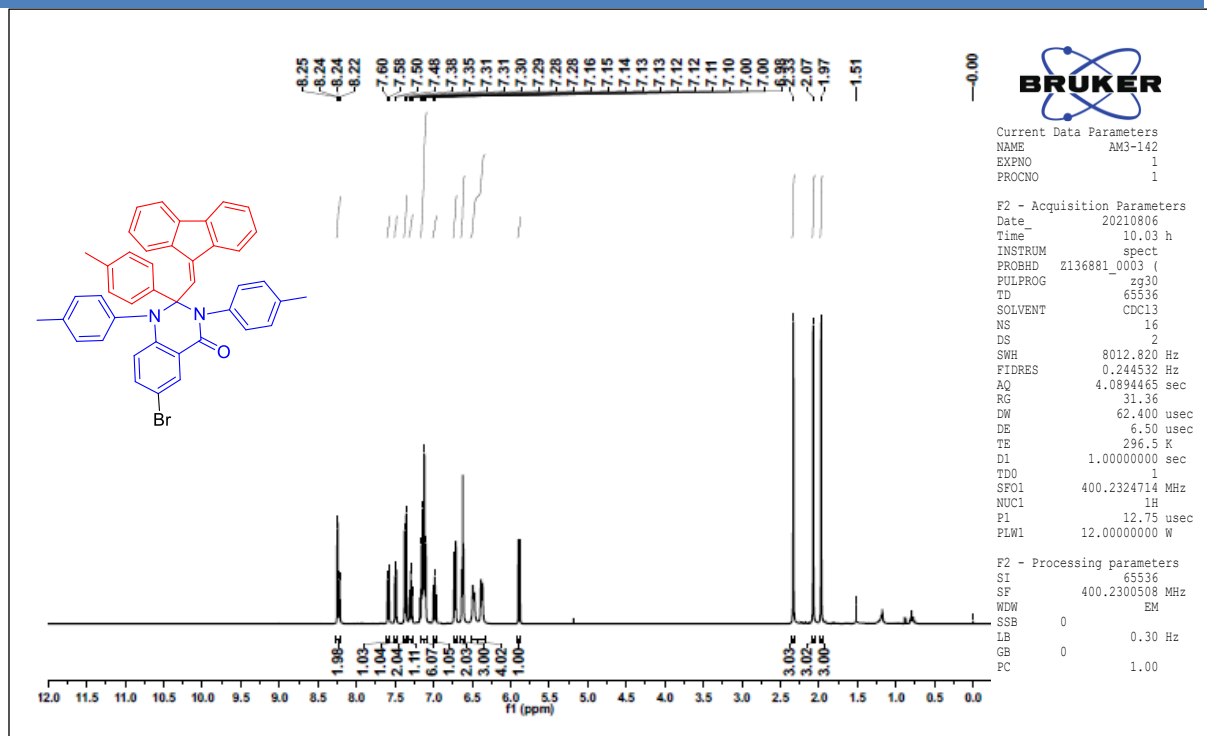

**Figure 77**  $^1\text{H}$  NMR spectrum of compound **4b**

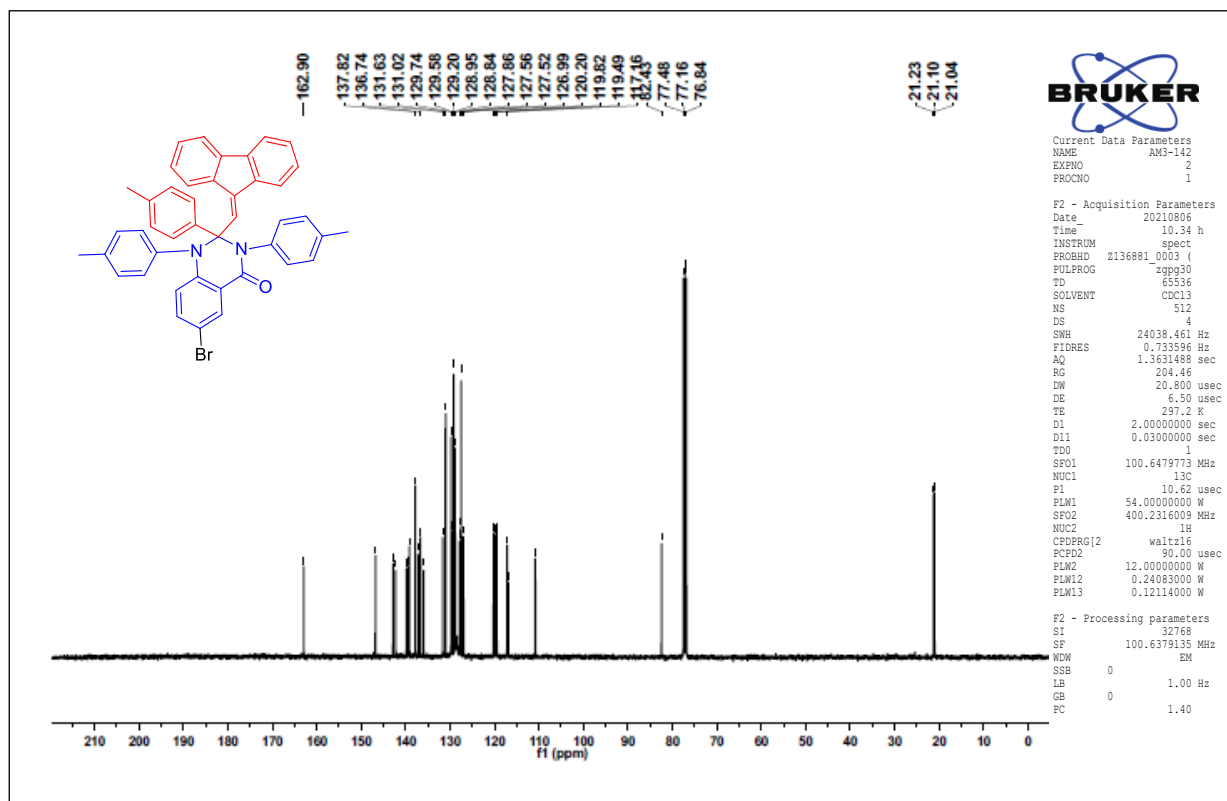

**Figure 78**  $^{13}\text{C}$  NMR spectrum of compound **4b**



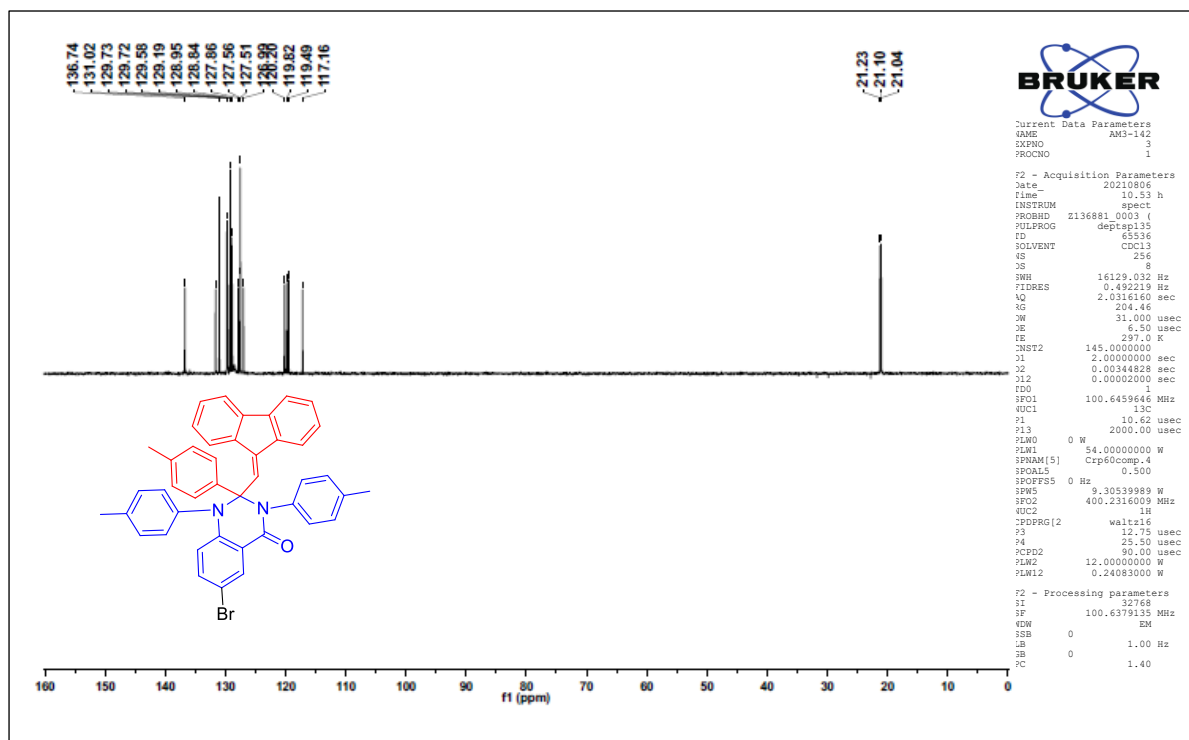

**Figure 79** DEPT-135 NMR spectrum of compound **4b**

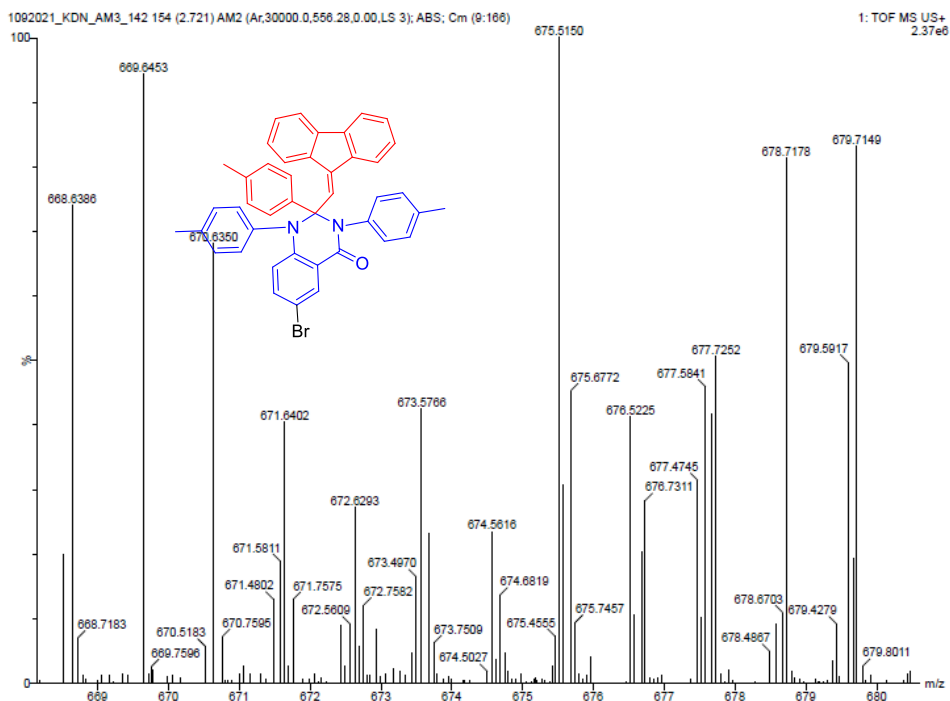

**Figure 80** HRMS spectrum of compound **4b**

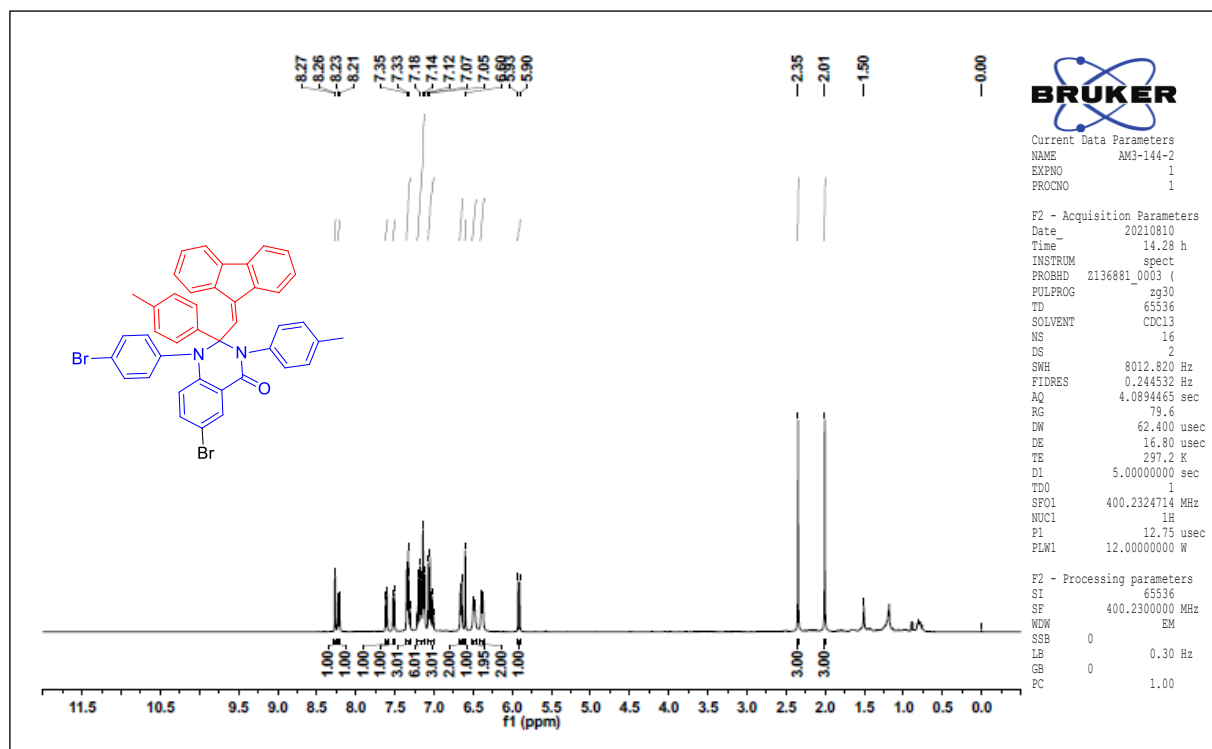

**Figure 81**  $^1\text{H}$  NMR spectrum of compound **4c**

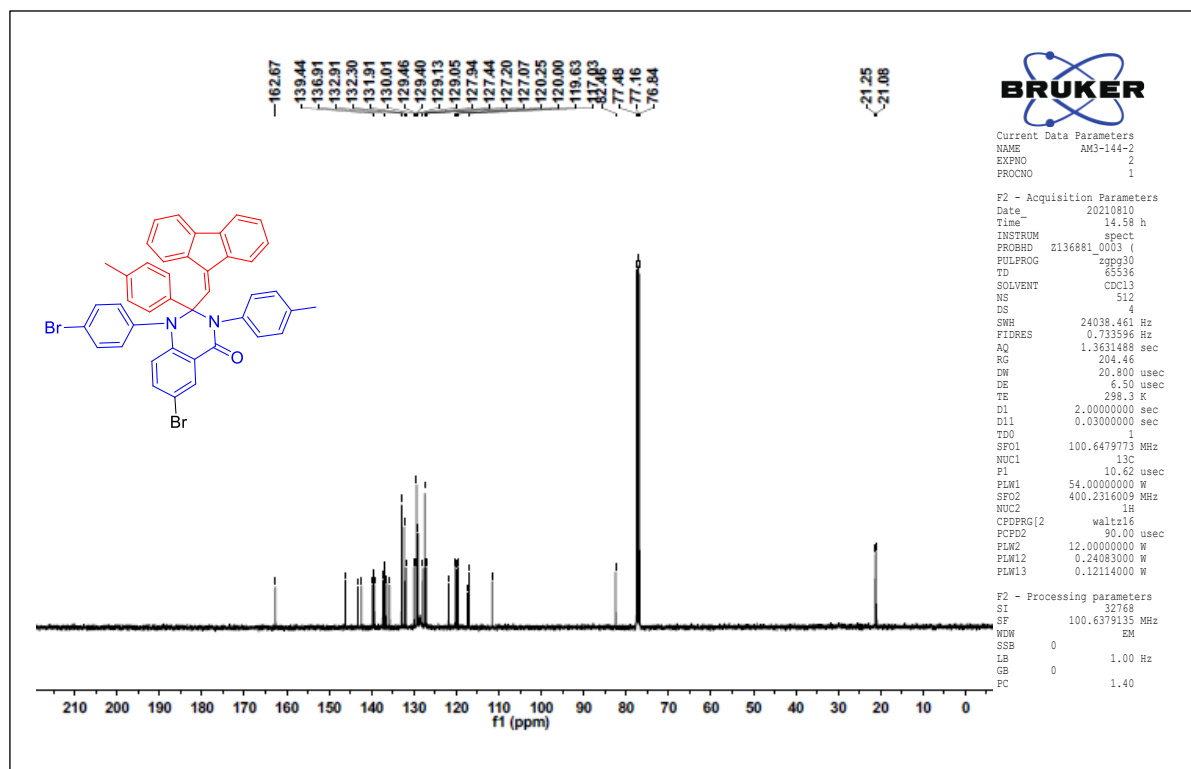

**Figure 82**  $^{13}\text{C}$  NMR spectrum of compound **4c**

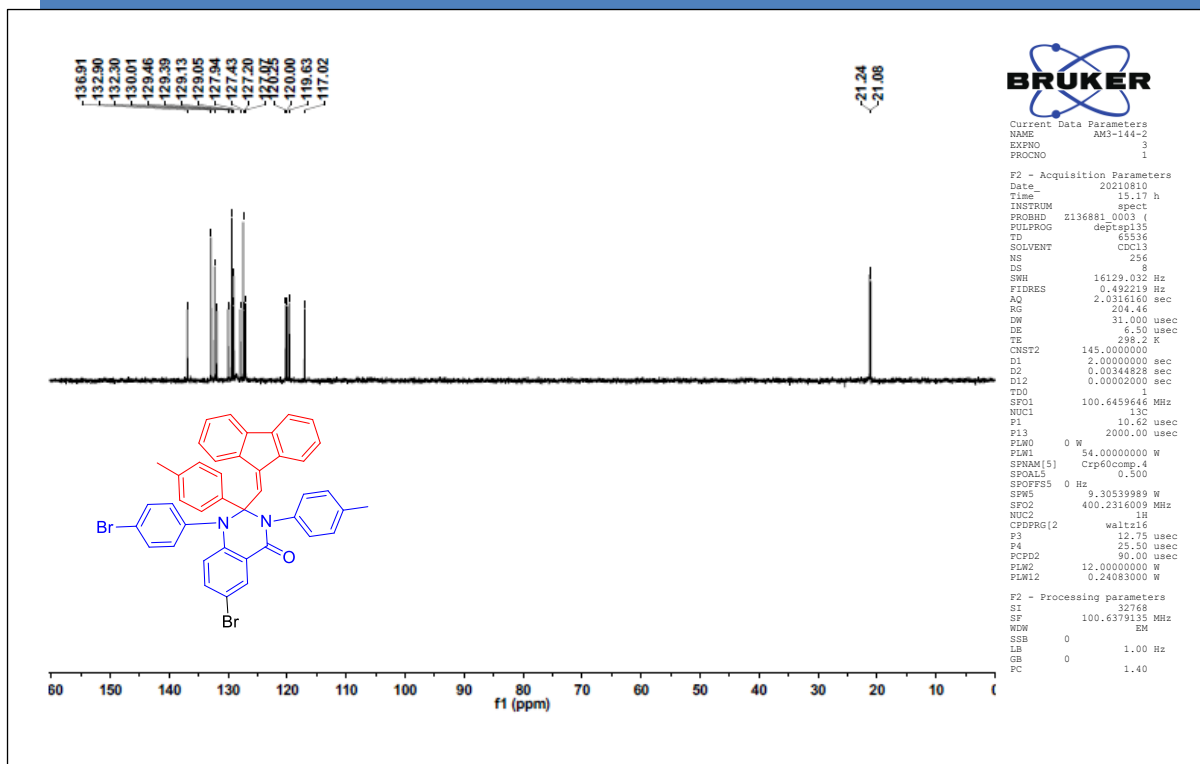

**Figure 83** DEPT-135 NMR spectrum of compound **4c**

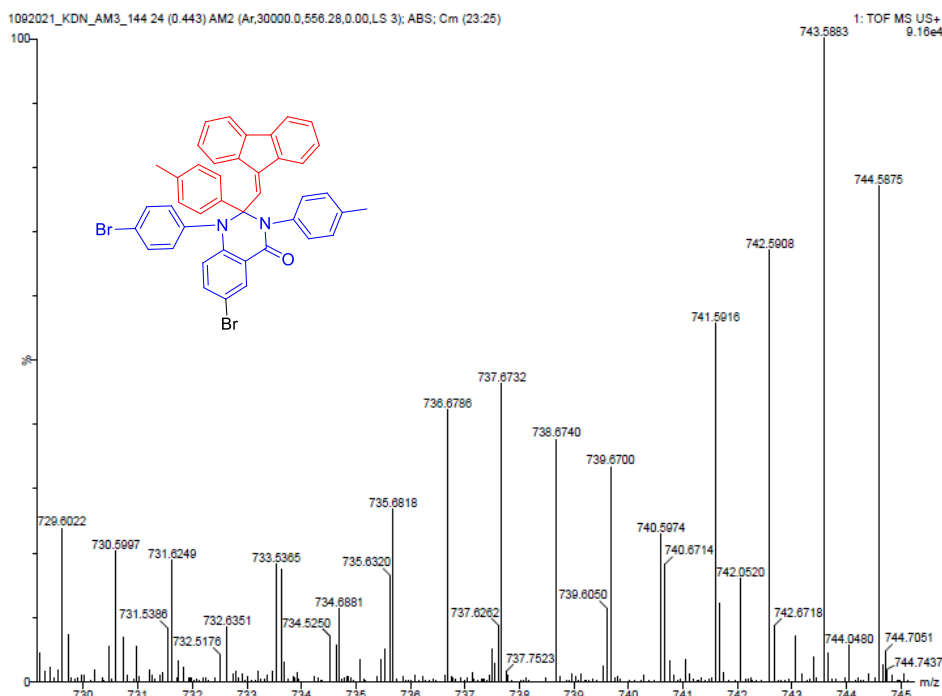

**Figure 84** HRMS spectrum of compound **4c**

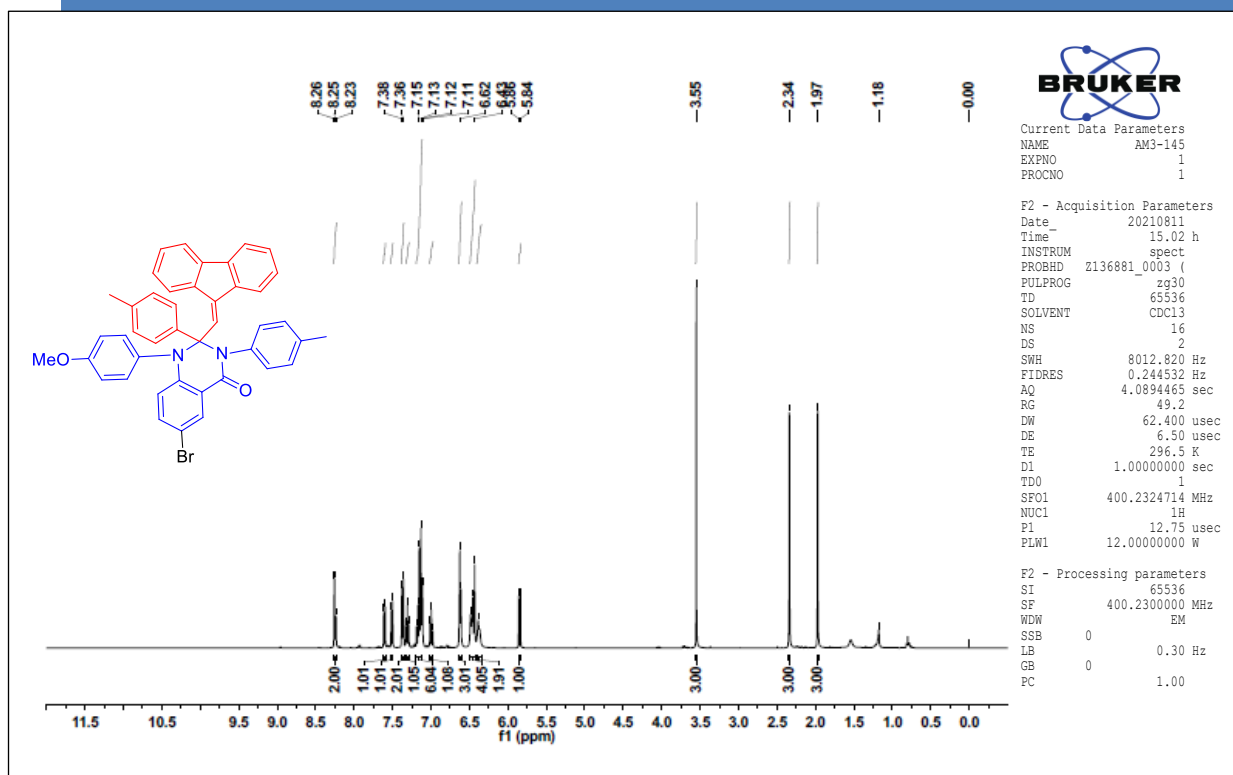Figure 85 <sup>1</sup>H NMR spectrum of compound 4d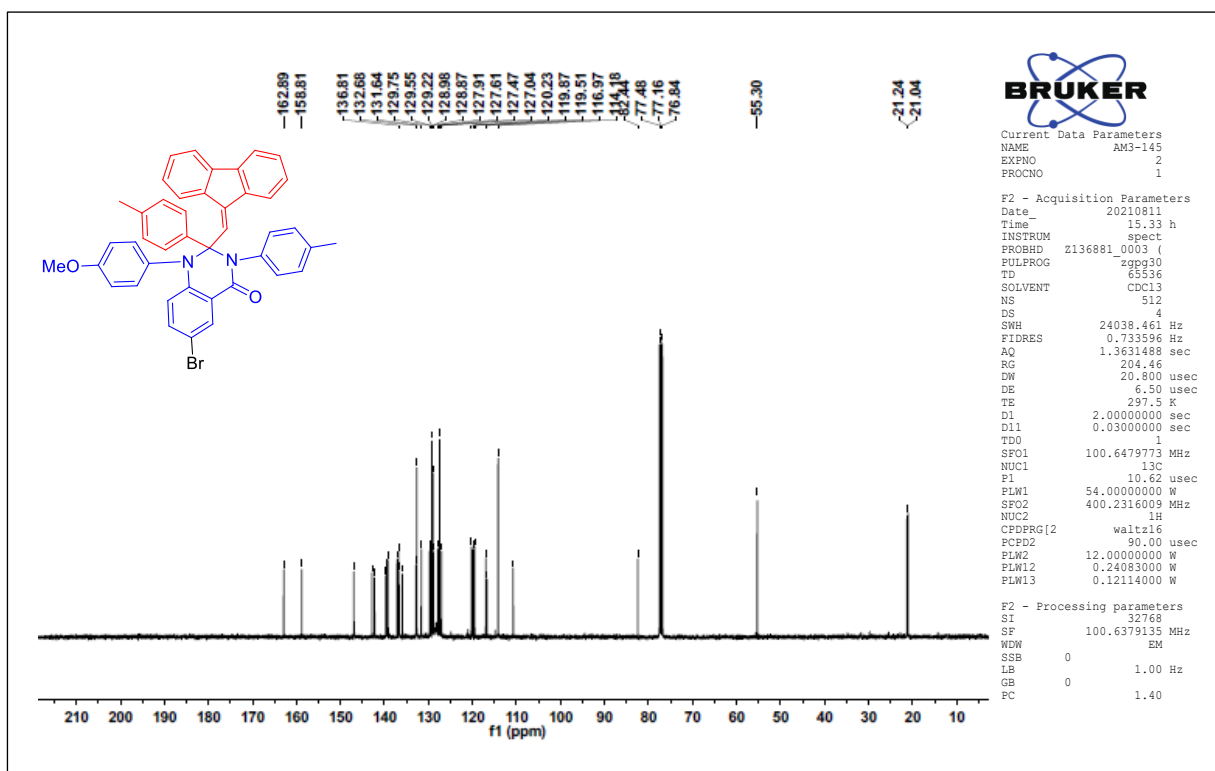Figure 86 <sup>13</sup>C NMR spectrum of compound 4d

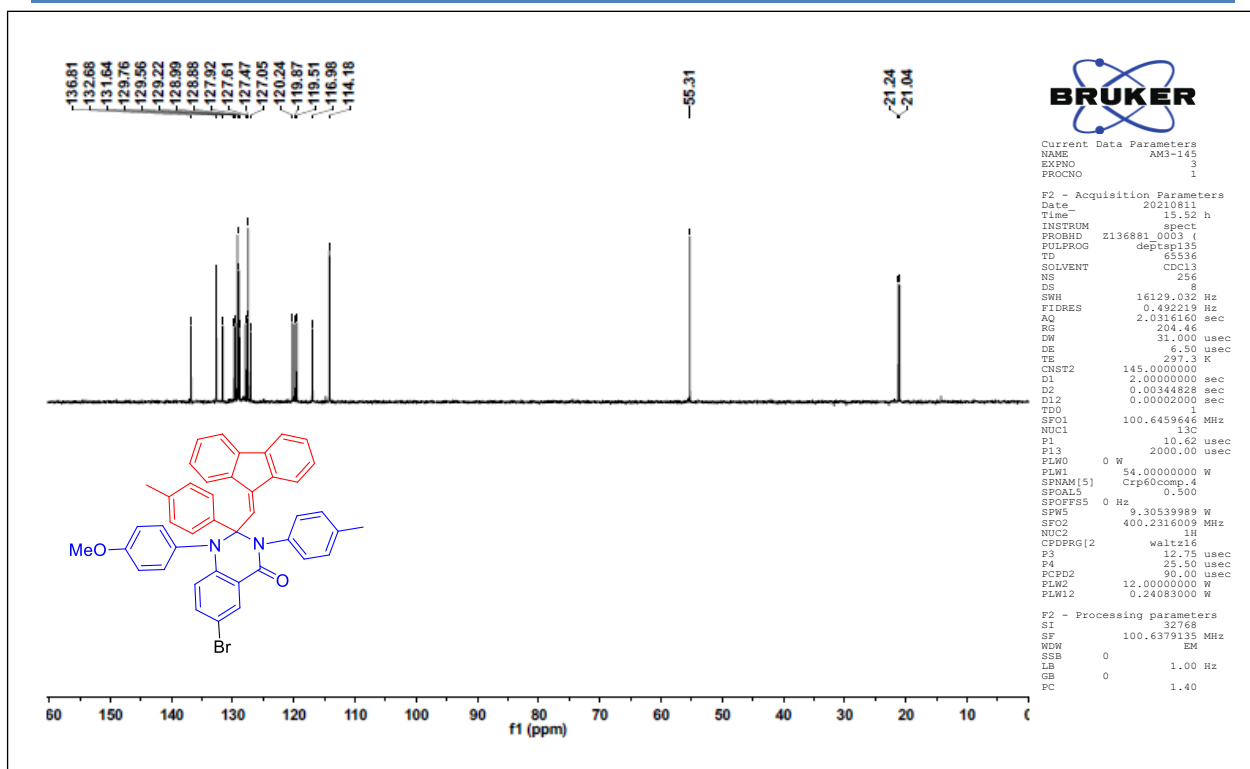

**Figure 87** DEPT-135 NMR spectrum of compound **4c**

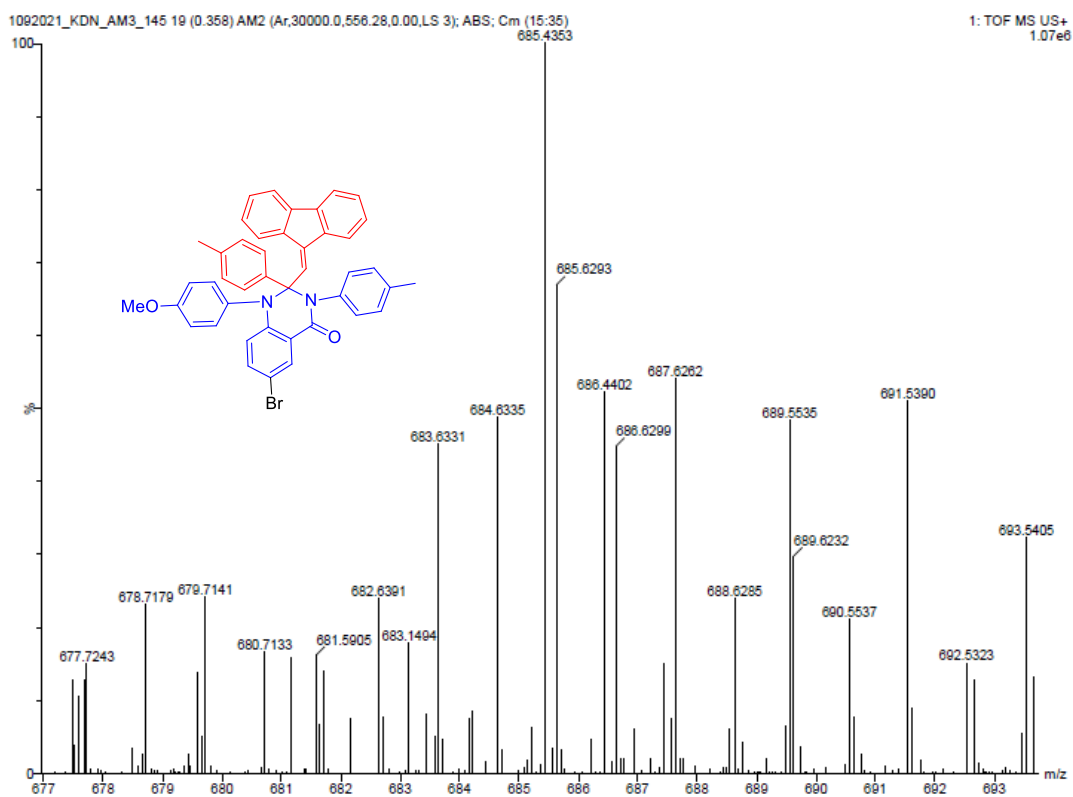

**Figure 88** HRMS spectrum of compound **4d**

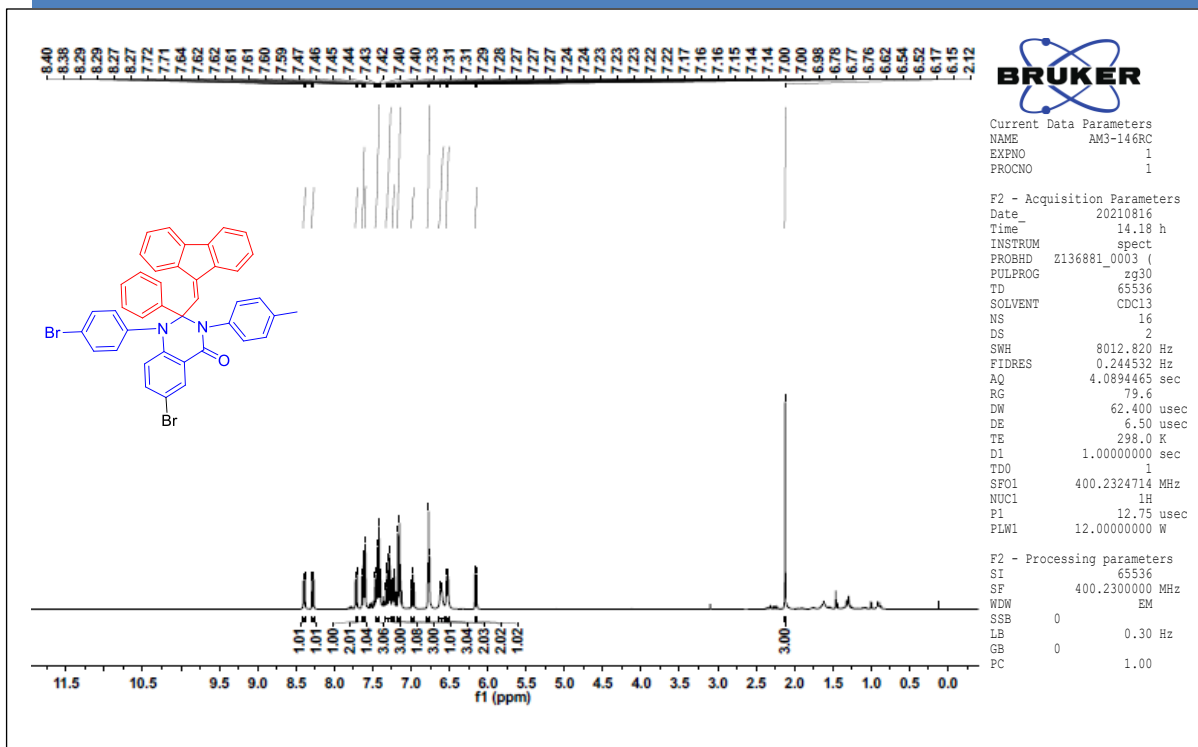Figure 89  $^1\text{H}$  NMR spectrum of compound **4e**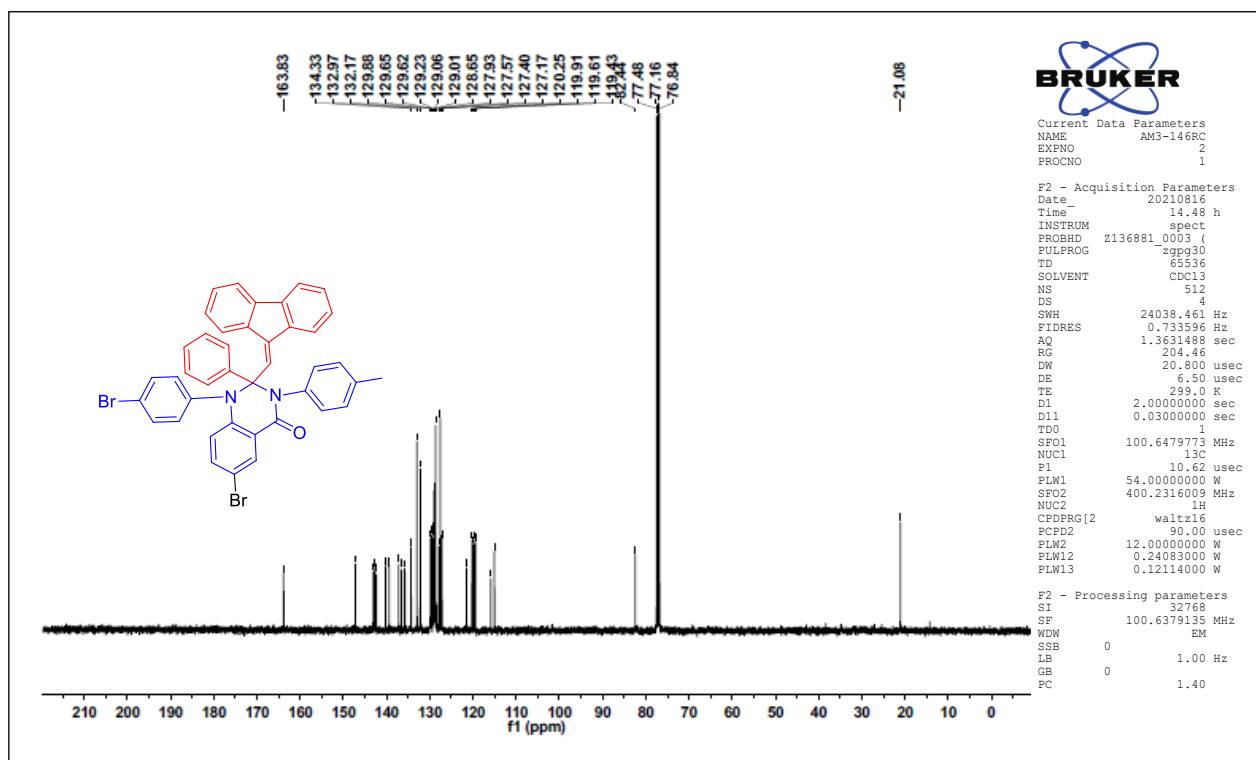Figure 90  $^{13}\text{C}$  NMR spectrum of compound **4e**

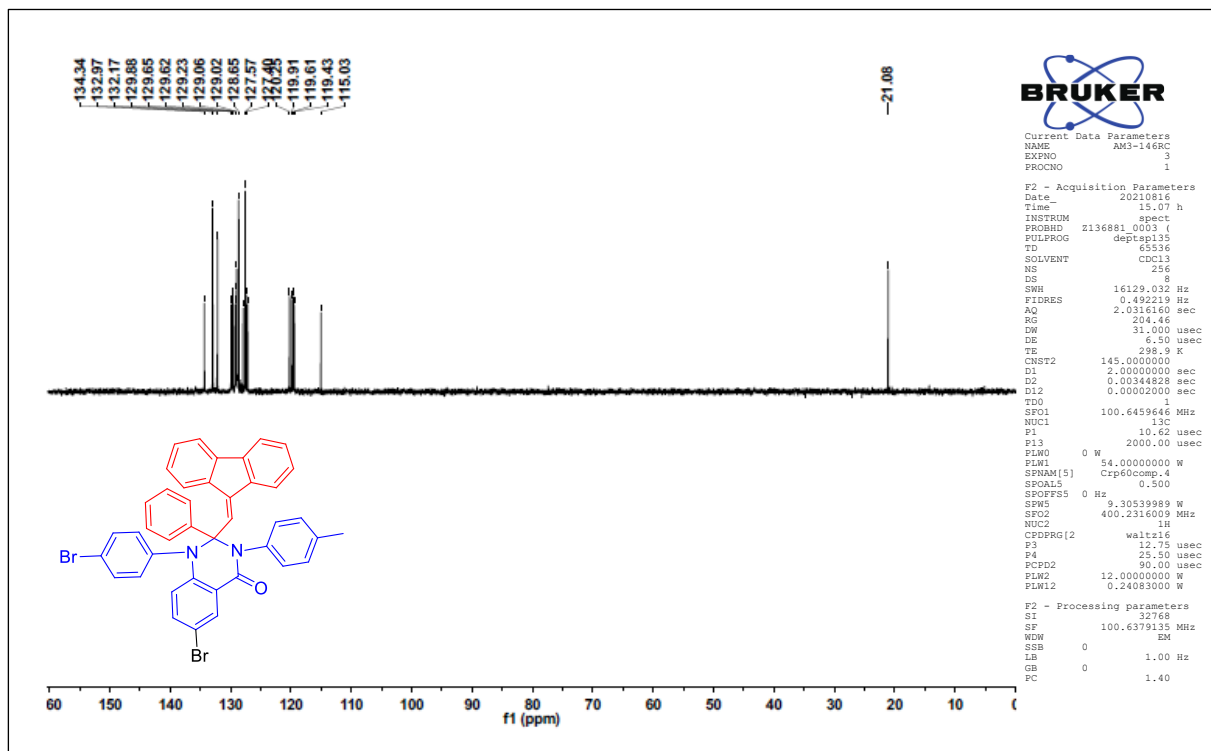

Figure 91 DEPT-135 NMR spectrum of compound 4e

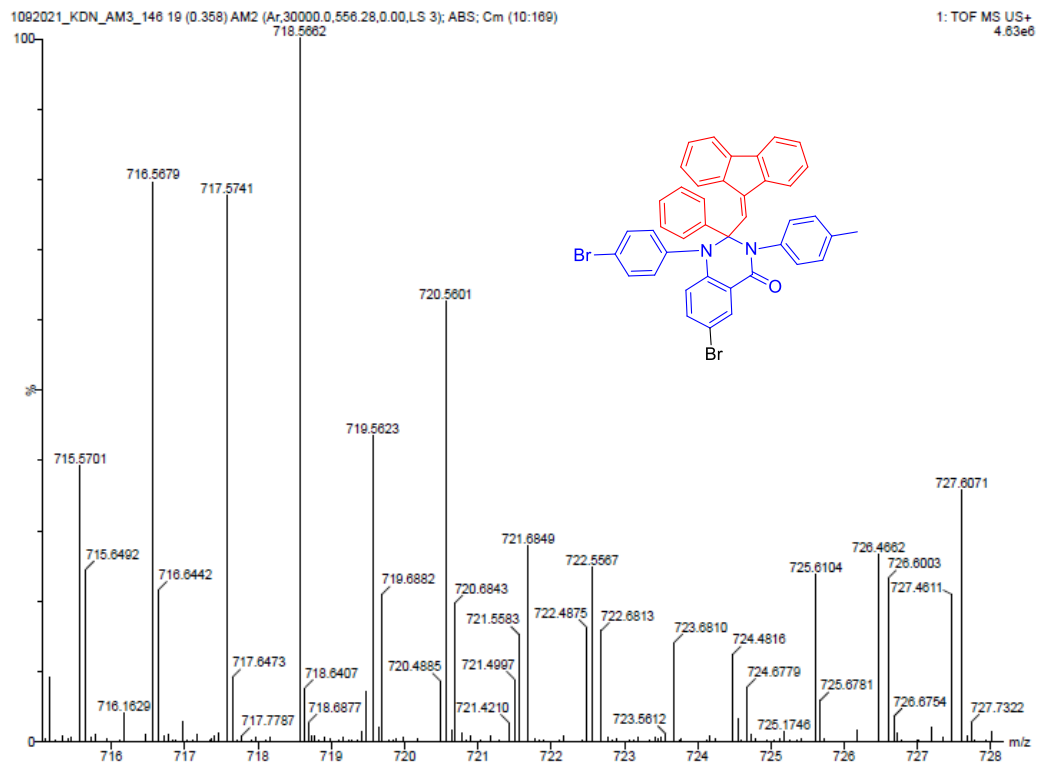

Figure 92 HRMS spectrum of compound 4e

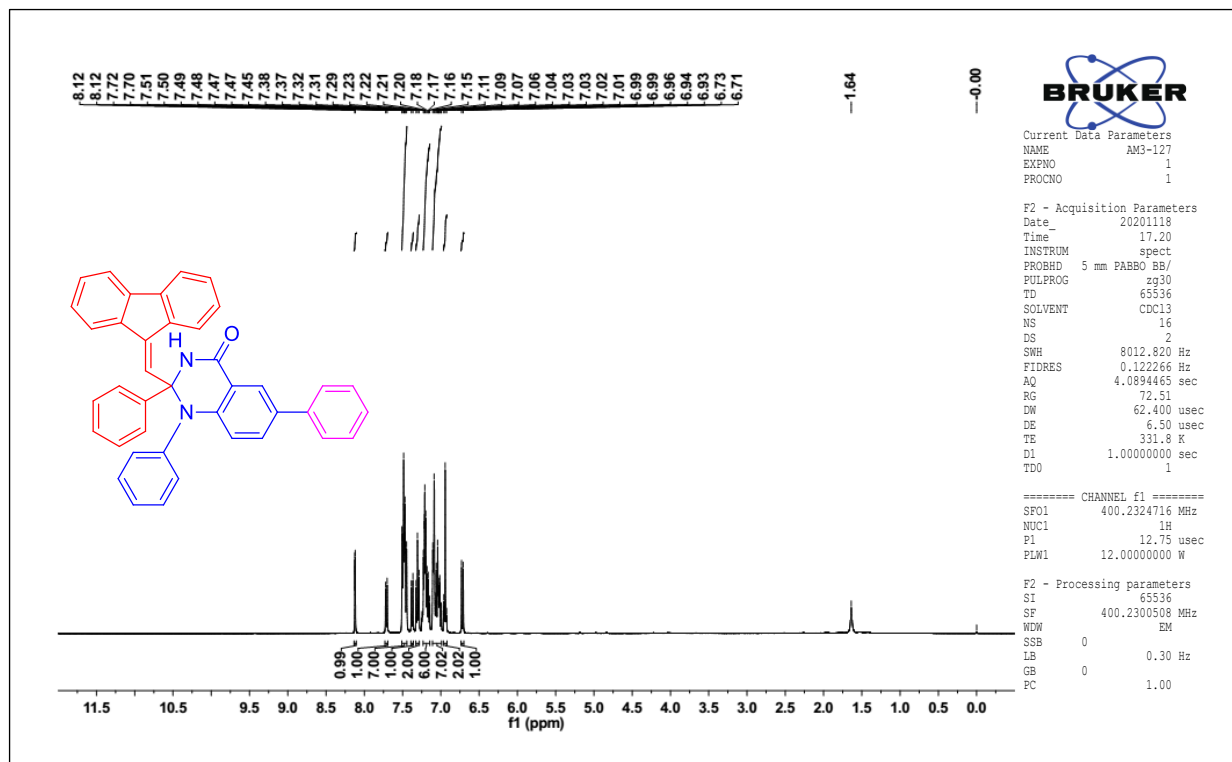Figure 93  $^1\text{H}$  NMR spectrum of compound 5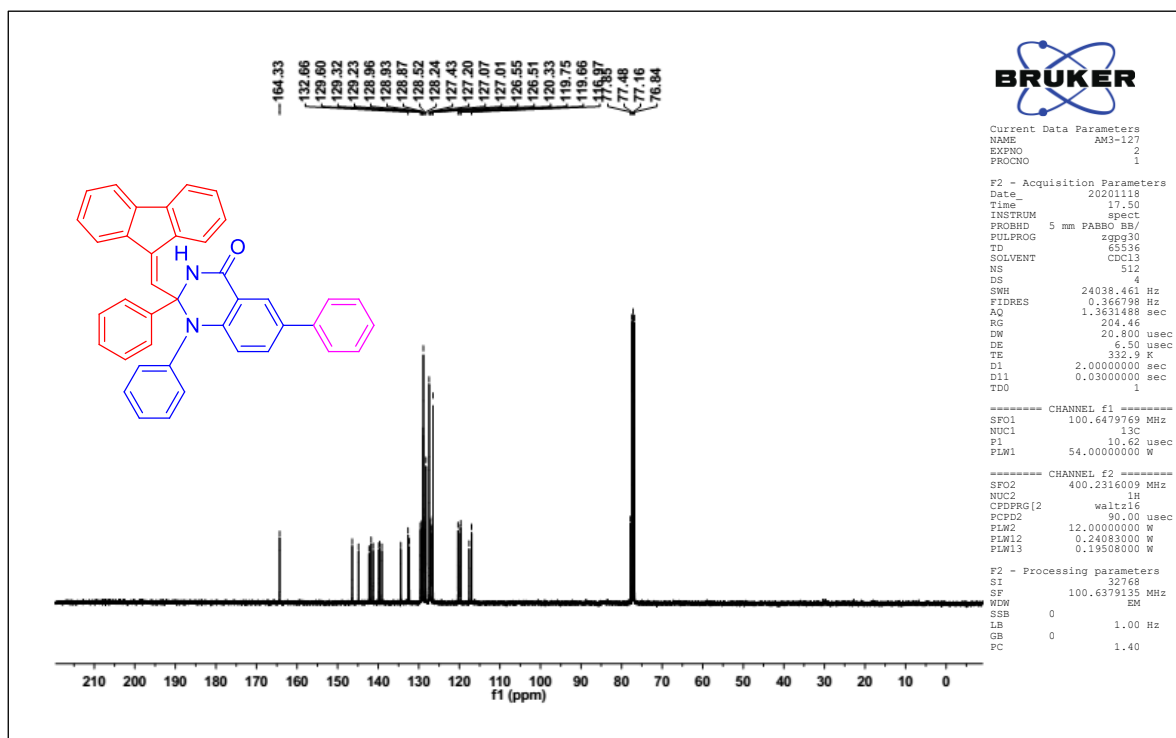Figure 94  $^{13}\text{C}$  NMR spectrum of compound 5



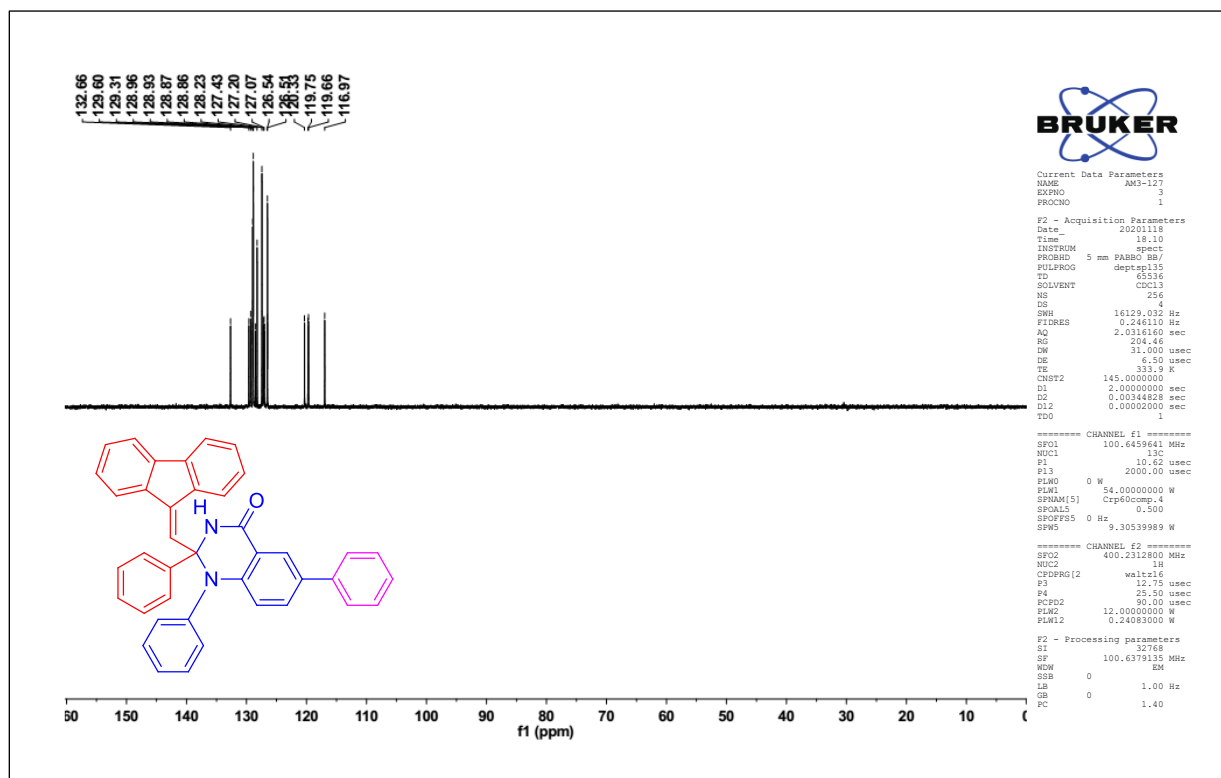

Figure 95 DEPT-135 NMR spectrum of compound 5

AM3-127 #74 RT: 1.36 AV: 1 NL: 5.21E6  
 T: FTMS (1,1) + p ESI Full lock ms [100.00-1400.00]

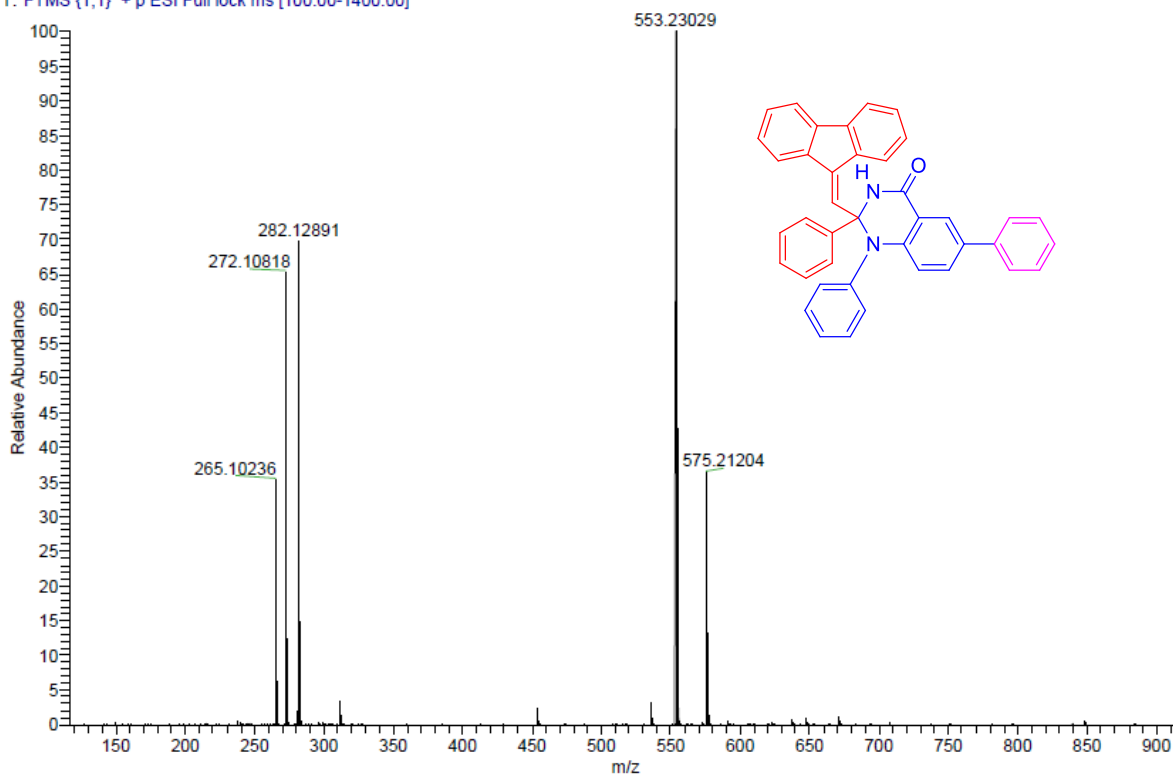

Figure 96 HRMS spectrum of compound 5

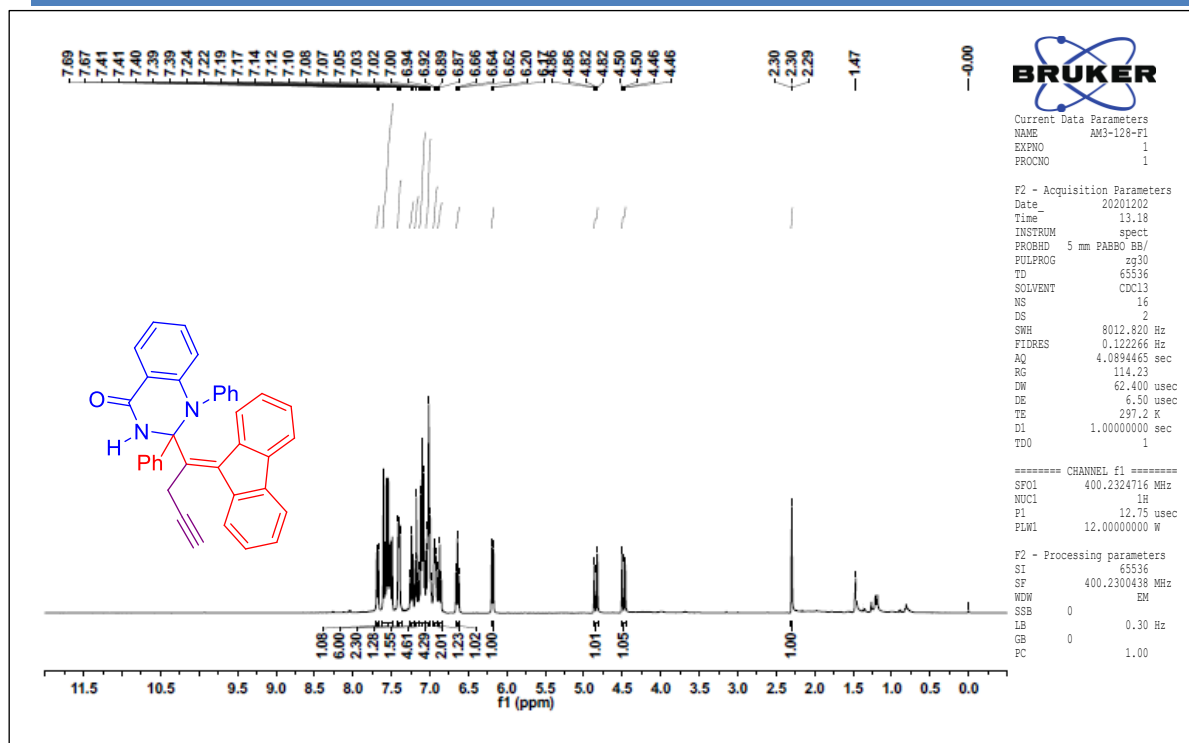Figure 97  $^1\text{H}$  NMR spectrum of compound 6a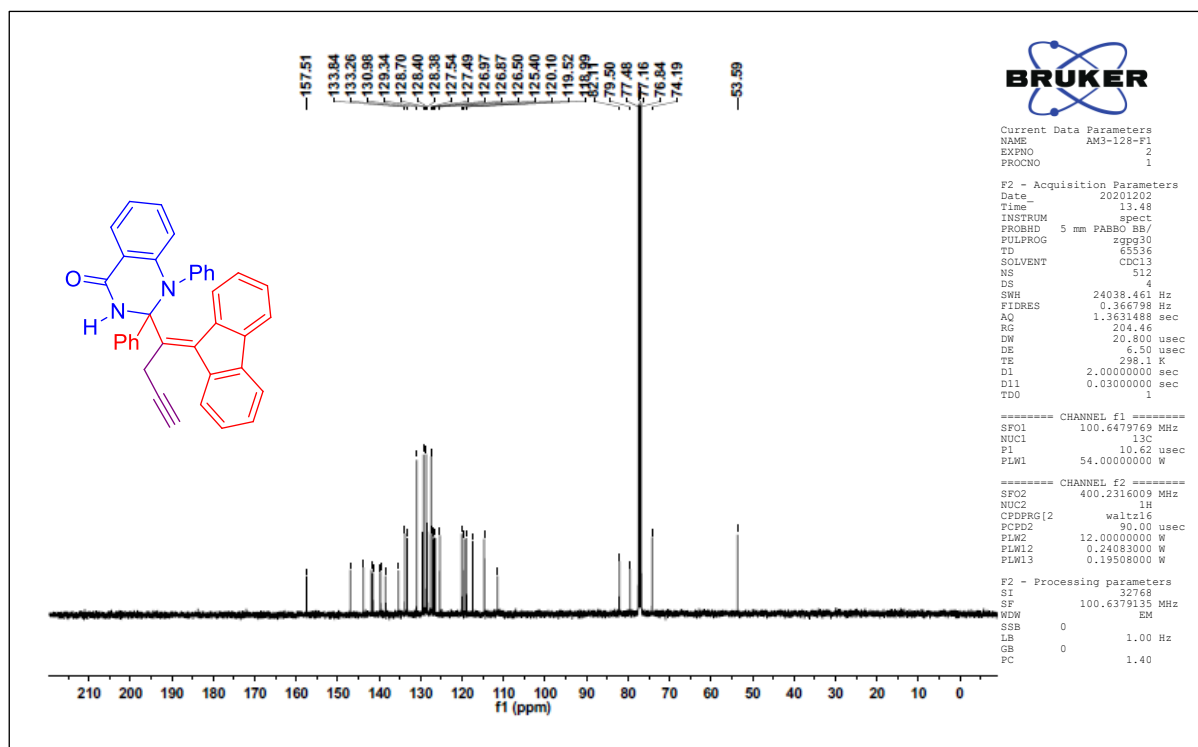Figure 98  $^{13}\text{C}$  NMR spectrum of compound 6a

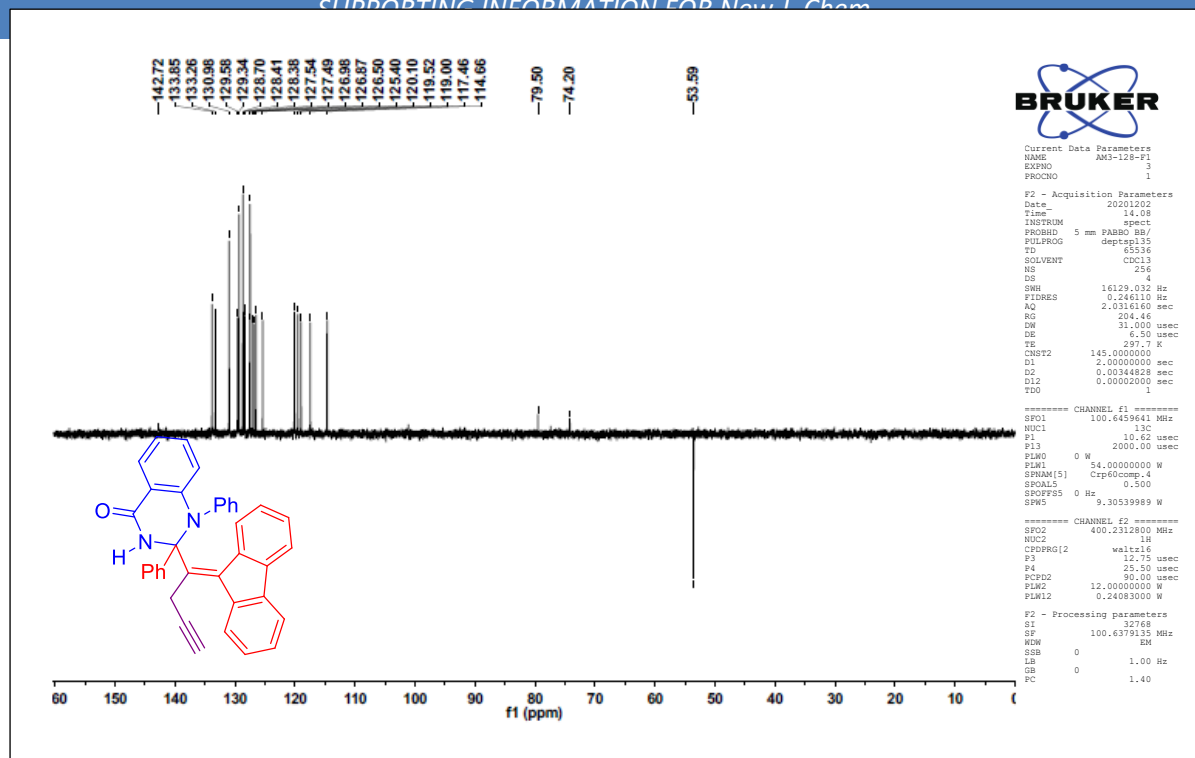

Figure 99 DEPT-135 NMR spectrum of compound 6a

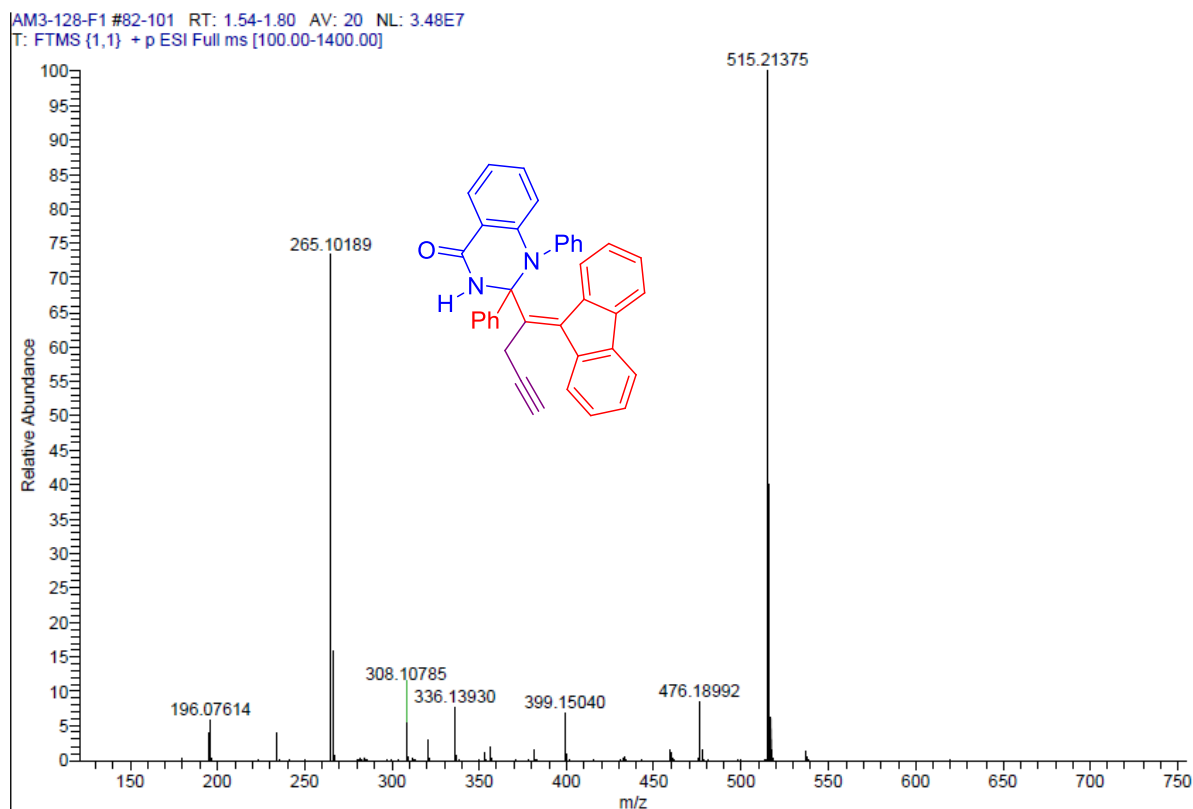

Figure 100 HRMS spectrum of compound 6a

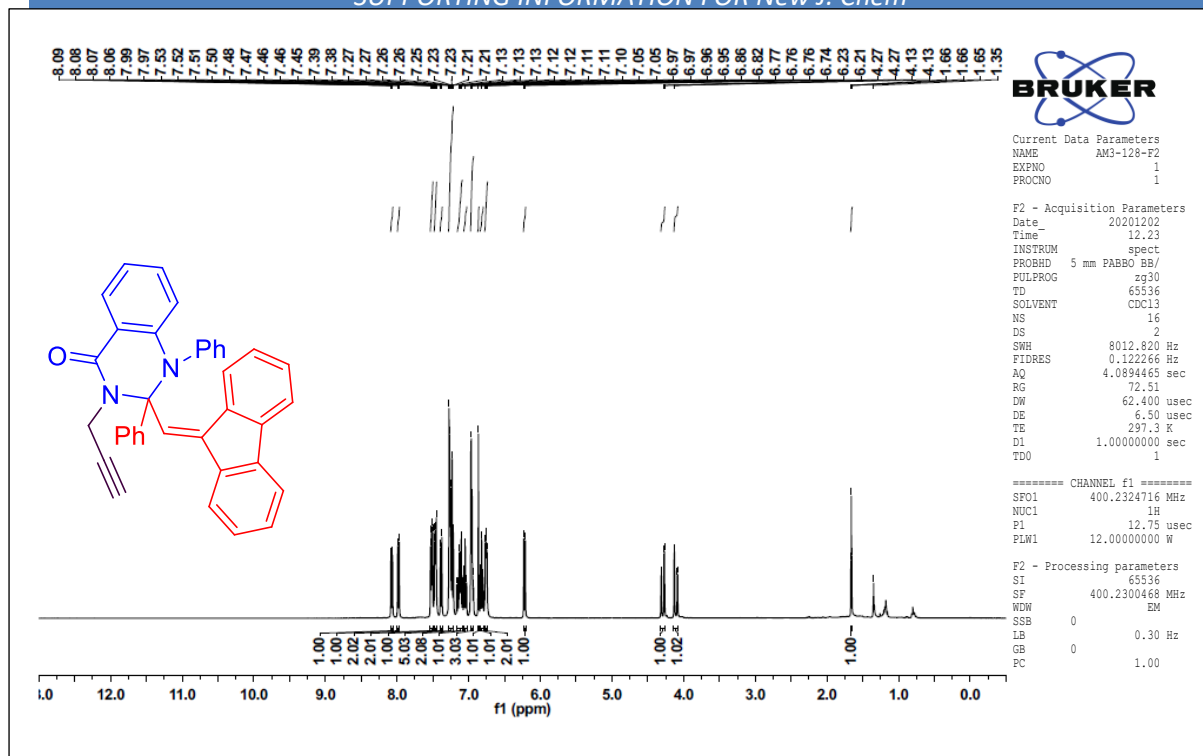Figure 101  $^1\text{H}$  NMR spectrum of compound **6b**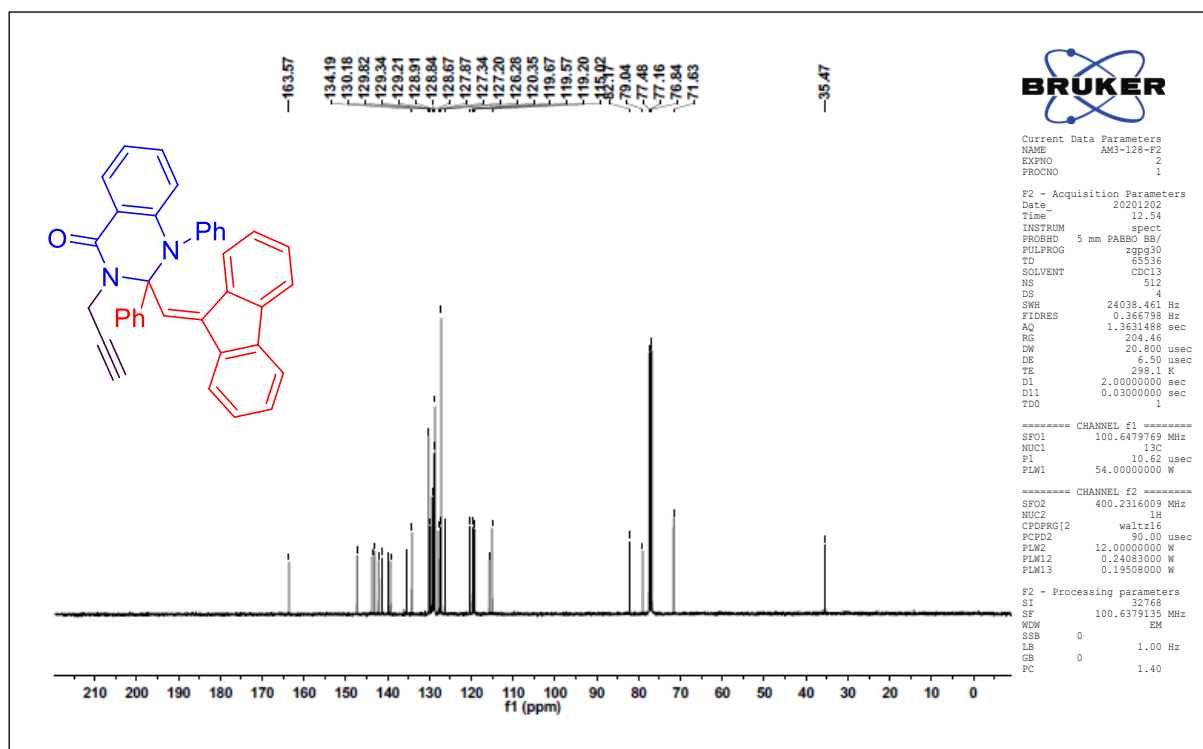Figure 102  $^{13}\text{C}$  NMR spectrum of compound **6b**

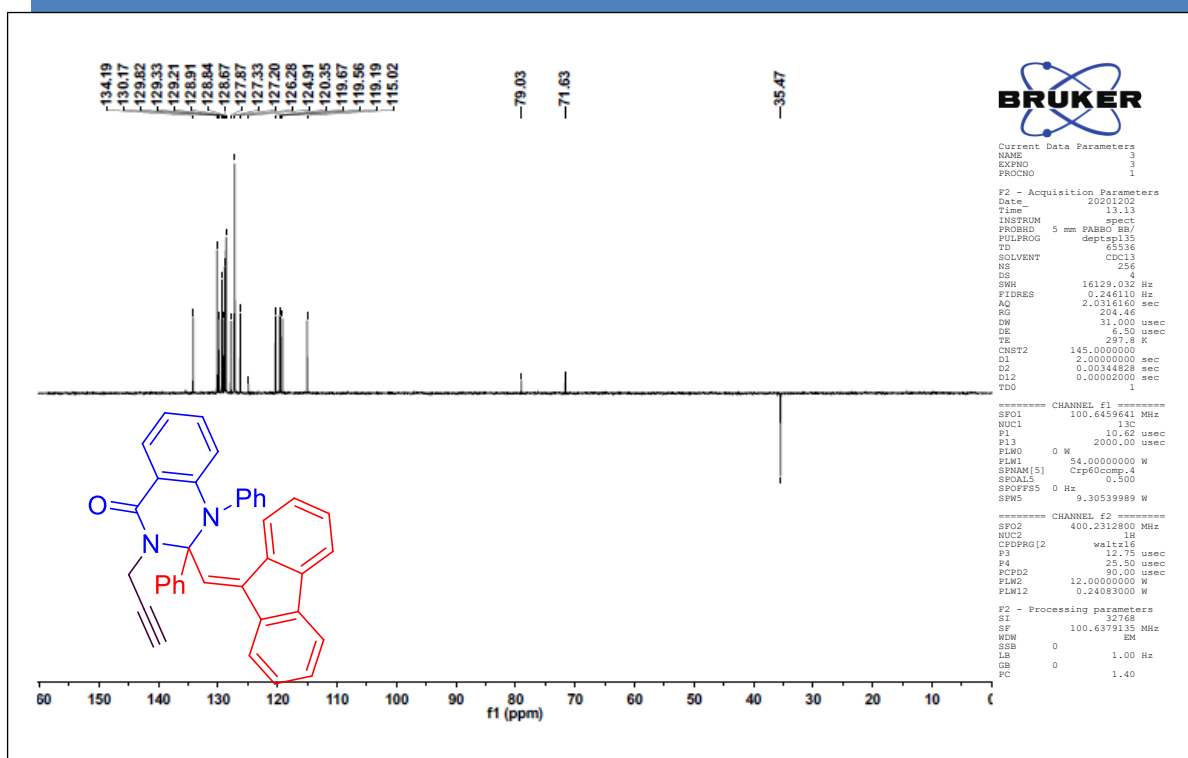Figure 103 DEPT-135 NMR spectrum of compound **6b**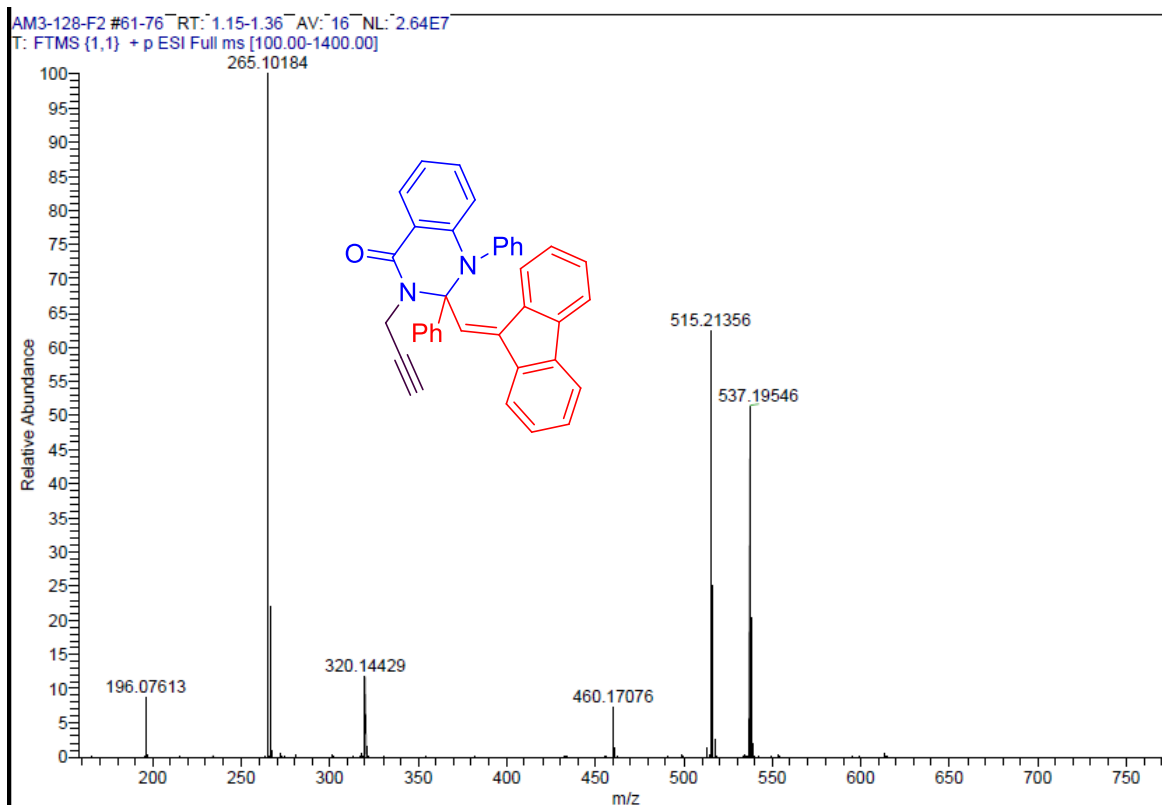Figure 104 HRMS spectrum of compound **6b**

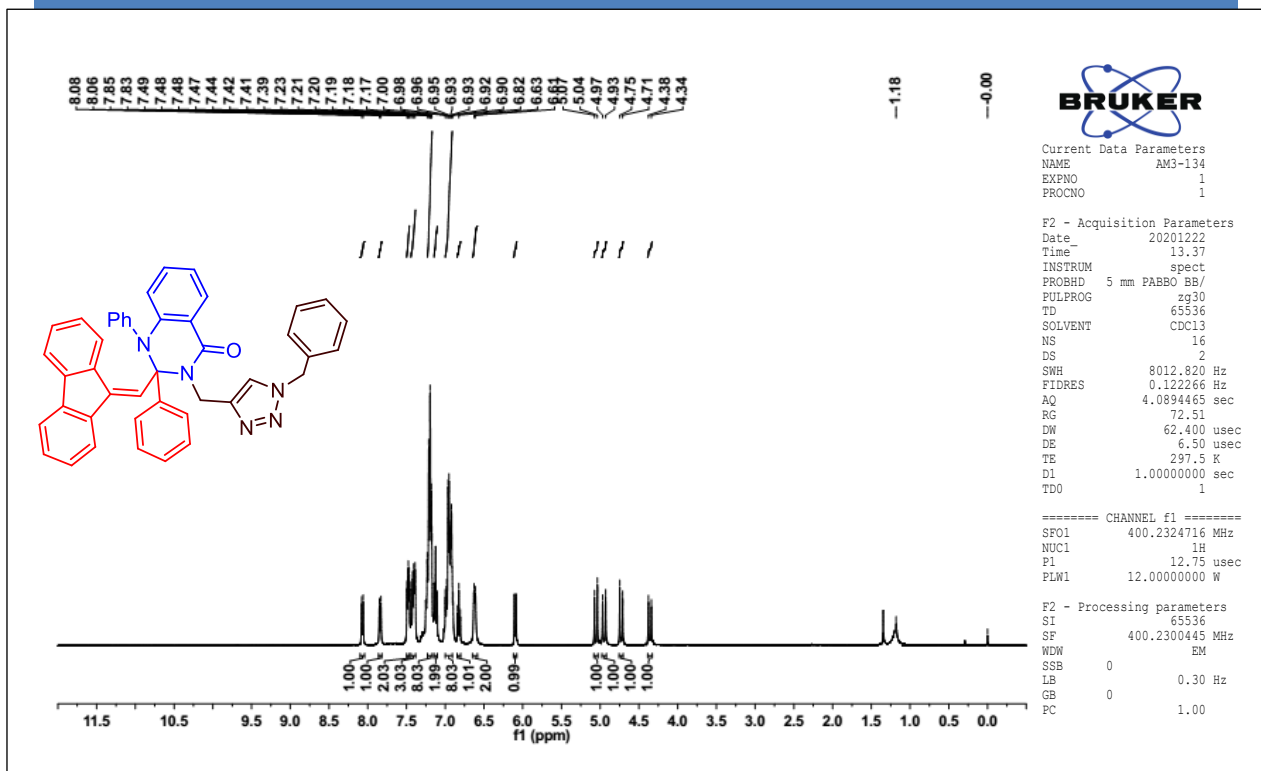Figure 105  $^1\text{H}$  NMR spectrum of compound 7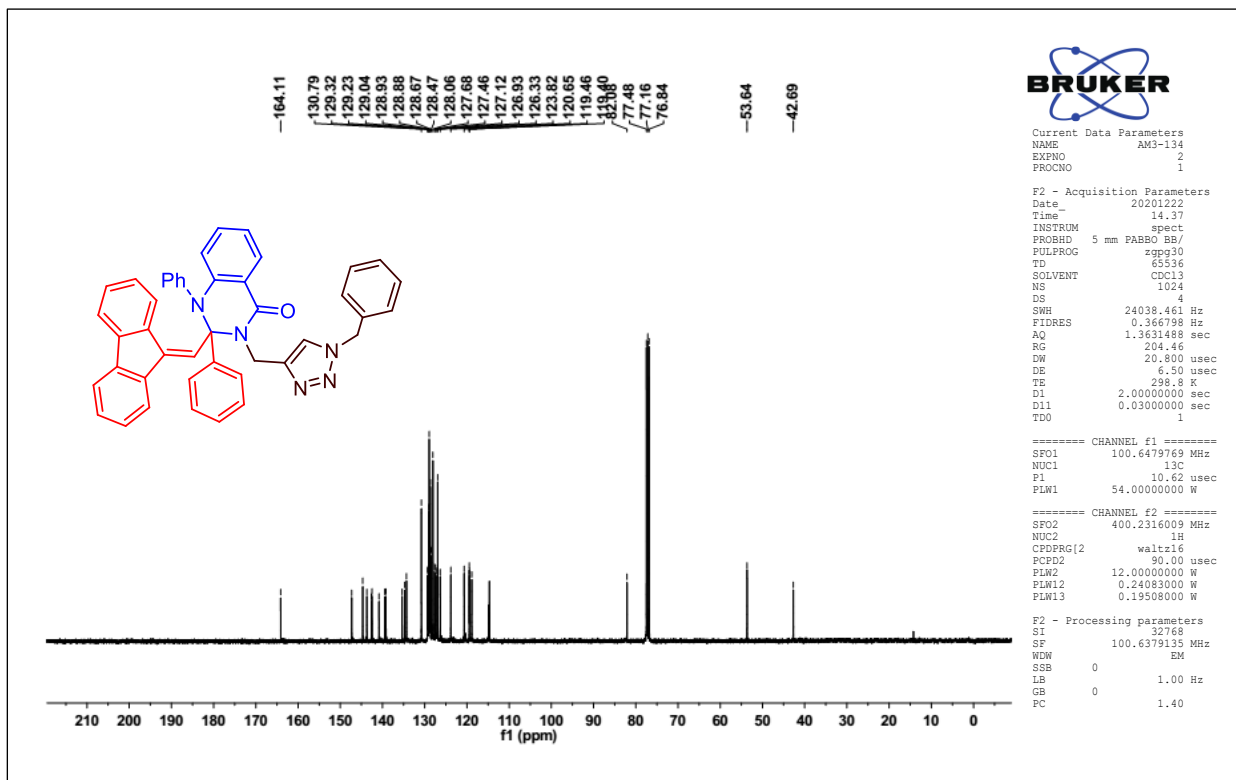Figure 106  $^{13}\text{C}$  NMR spectrum of compound 7

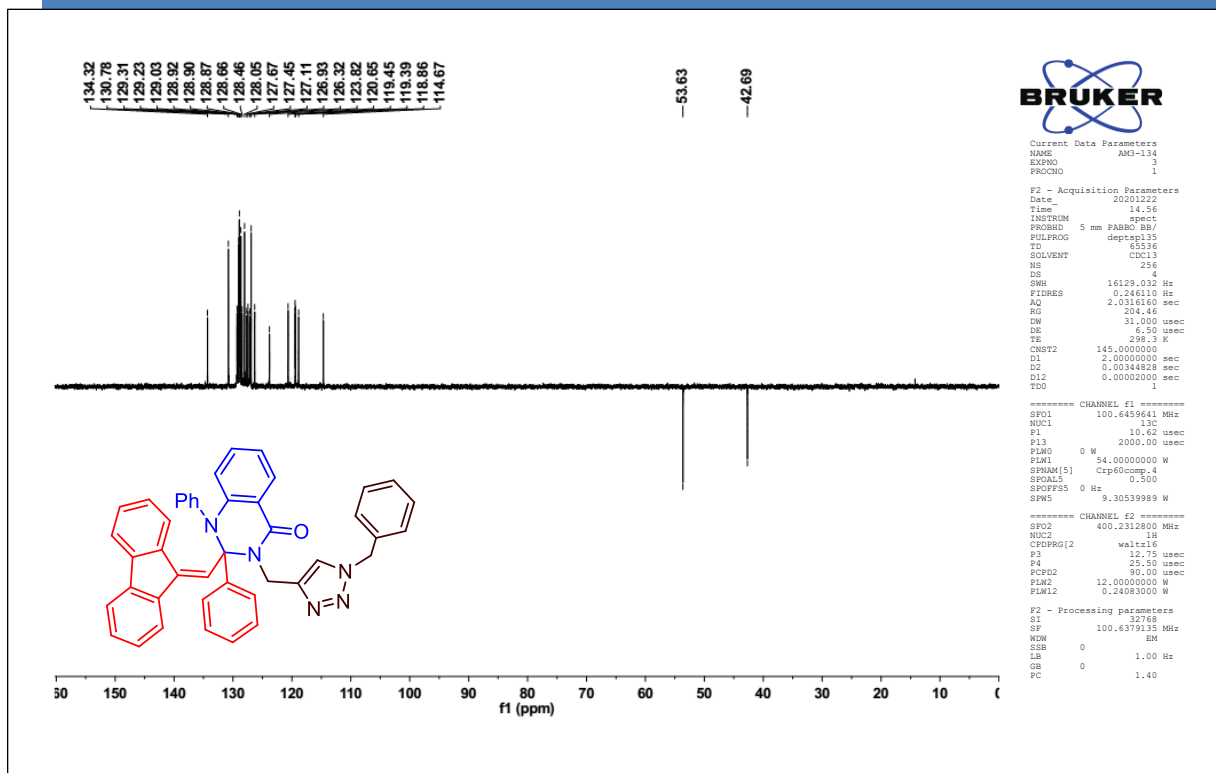

Figure 107 DEPT-135 NMR spectrum of compound 7

AM3-134 #59-77 RT: 1.16-1.40 AV: 19 NL: 8.36E7  
 T: FTMS (1,1) + p ESI Full ms [100.00-1400.00]

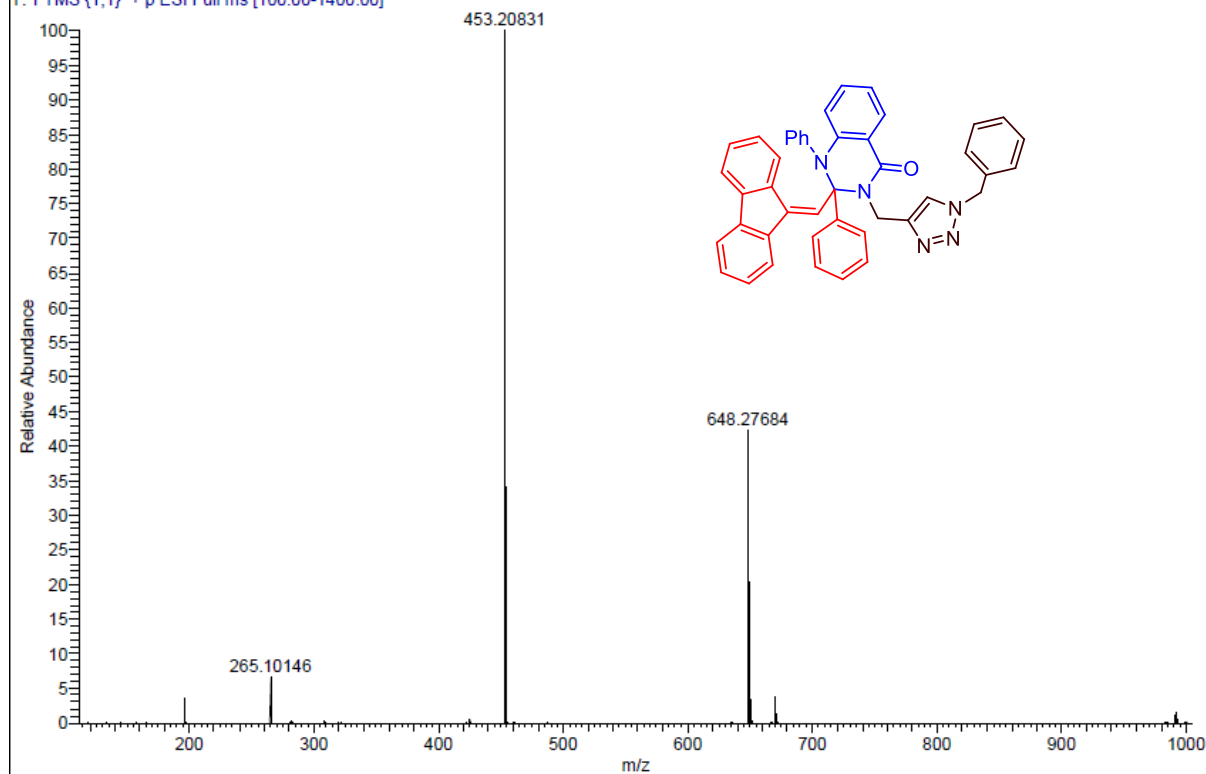

Figure 108 HRMS spectrum of compound 7





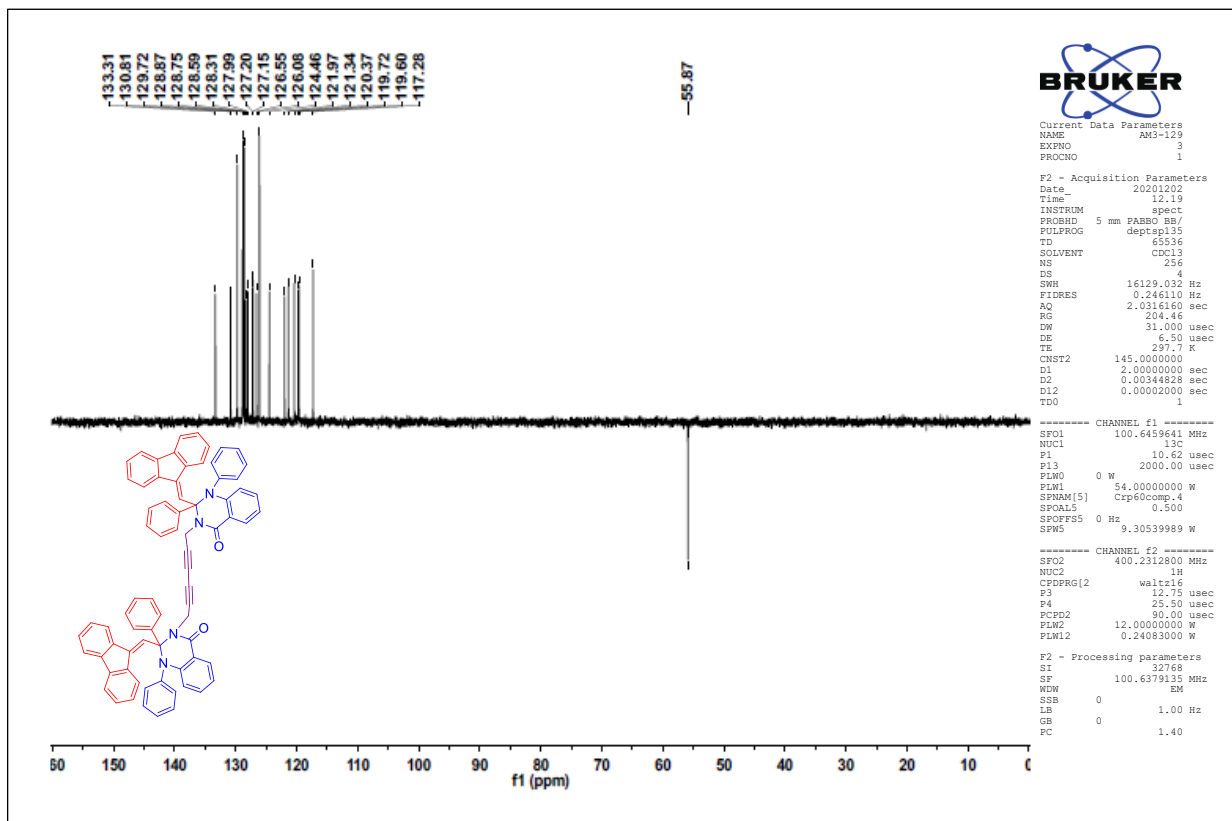Figure 111 DEPT-135 NMR spectrum of compound **8**

AM3-129 #76-94 RT: 1.39-1.64 AV: 19 NL: 2.42E5  
 T: FTMS (1,1) + p ESI Full lock ms [100.00-1400.00]

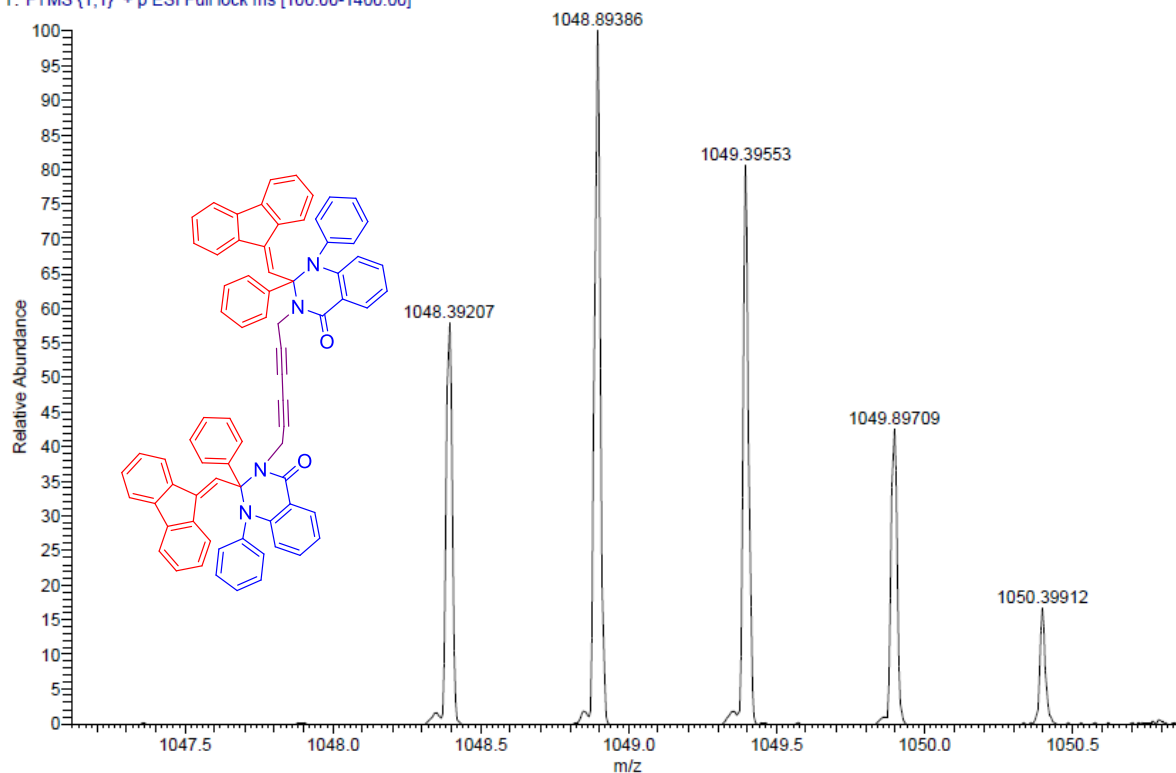Figure 112 HRMS spectrum of compound **8**

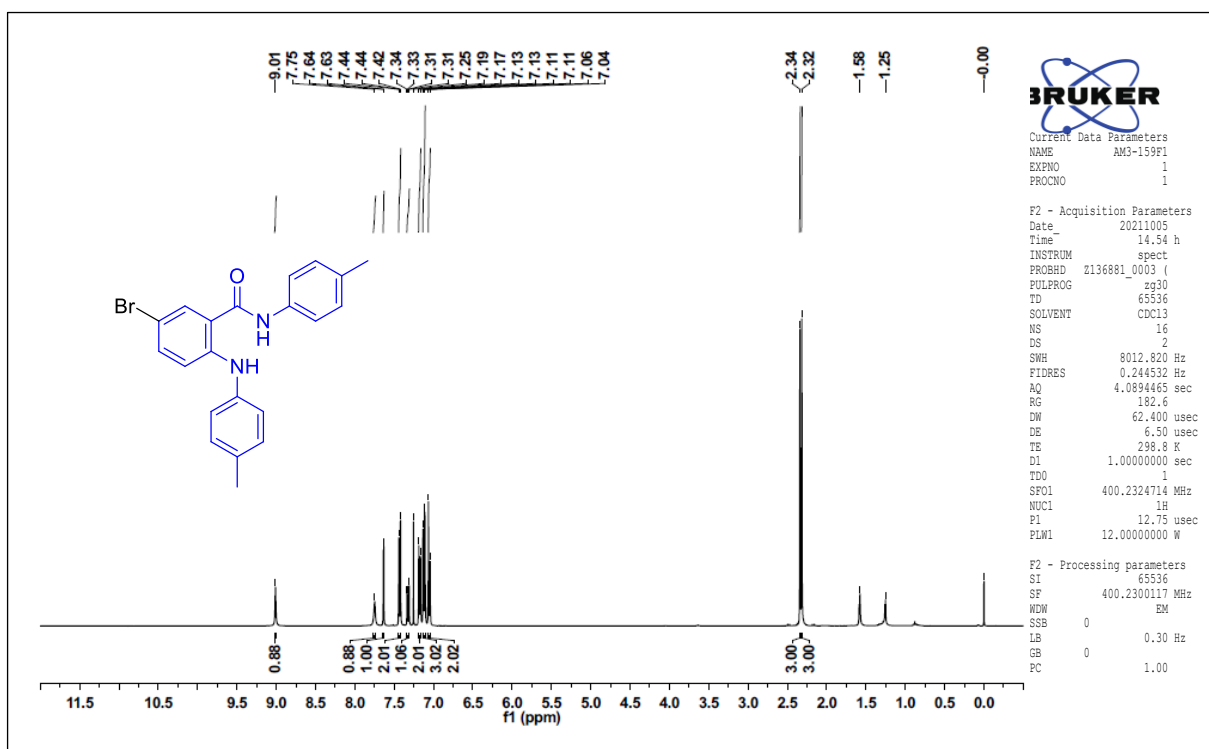Figure 113 <sup>1</sup>H NMR spectrum of compound **2f**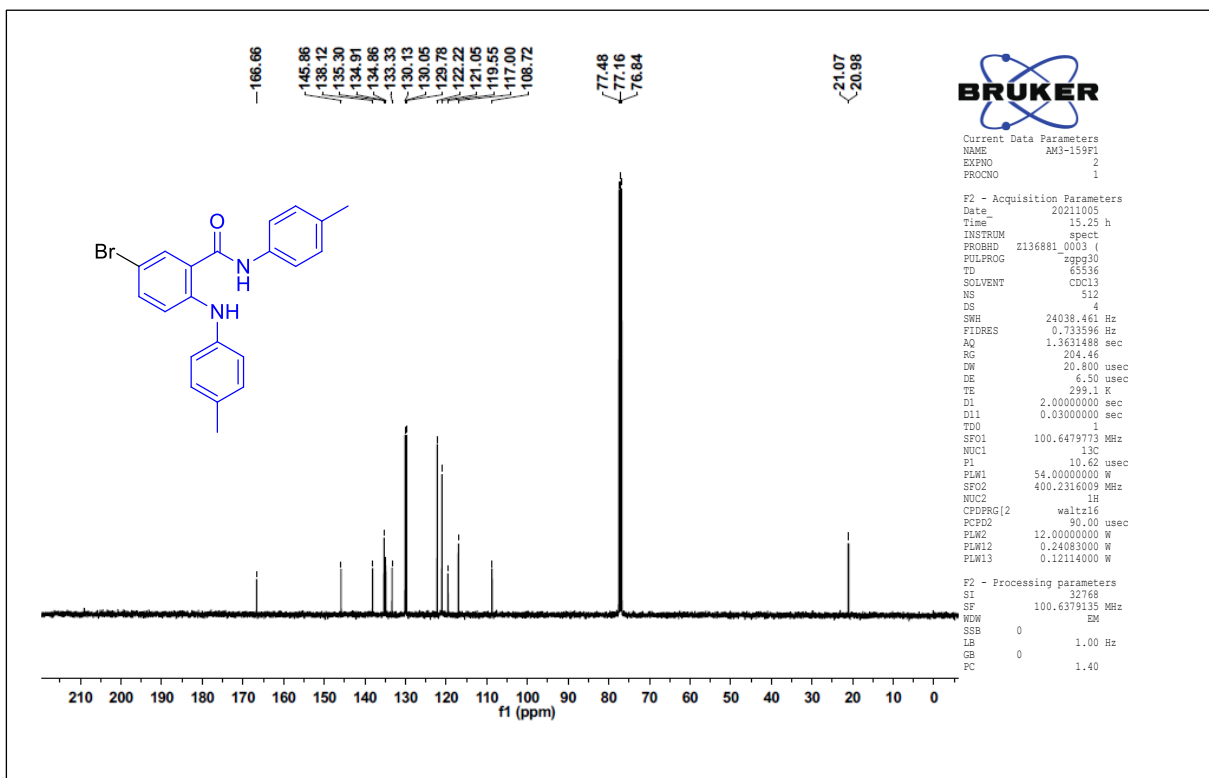Figure 114 <sup>13</sup>C NMR spectrum of compound **2f**

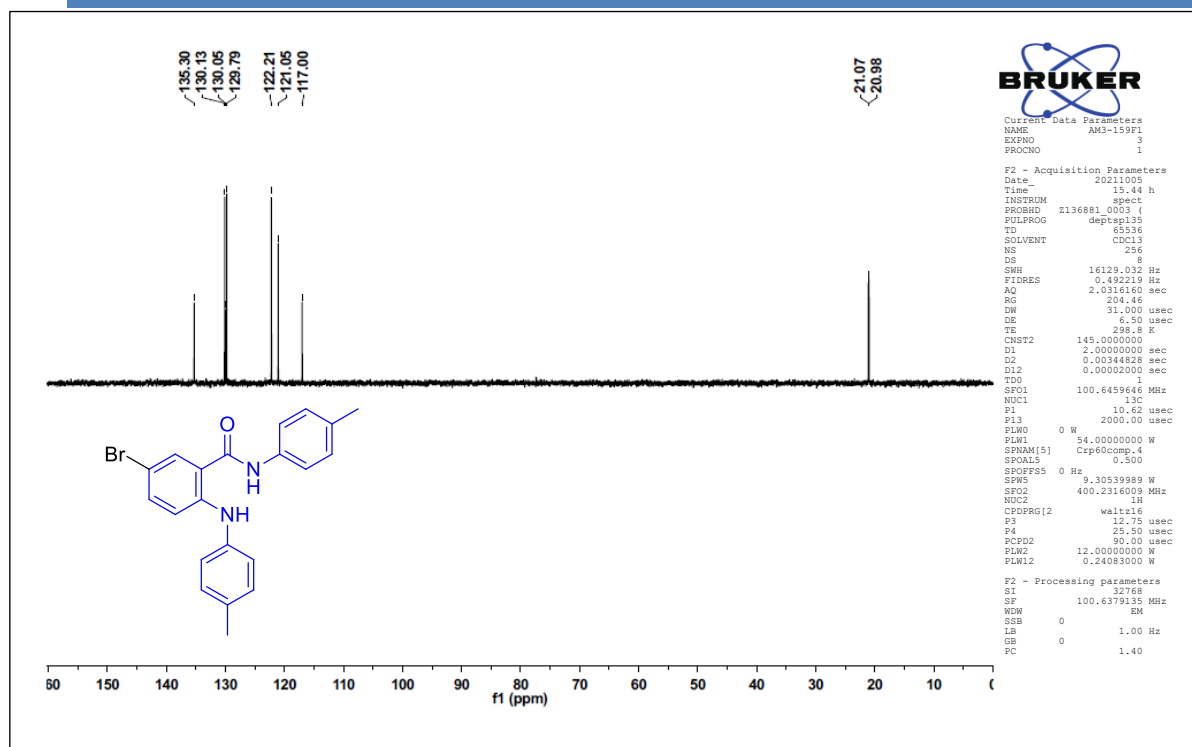

**Figure 115** DEPT-135 NMR spectrum of compound **2f**

## 2. Basic crystallographic data for compound **3i** & **4b**

Table 1. Crystal data and structure refinement for **3i**

|                        |                              |                                |
|------------------------|------------------------------|--------------------------------|
| Identification code    | <b>3i</b>                    |                                |
| Empirical formula      | $C_{35} H_{25} Cl_2 I N_2 O$ |                                |
| Formula weight         | 687.37                       |                                |
| Temperature            | 296(2) K                     |                                |
| Wavelength             | 0.71073 Å                    |                                |
| Crystal system         | Triclinic                    |                                |
| Space group            | P-1                          |                                |
| Unit cell dimensions   | $a = 11.086(4)$ Å            | $\alpha = 113.666(12)^\circ$ . |
|                        | $b = 11.540(4)$ Å            | $\beta = 91.973(14)^\circ$ .   |
|                        | $c = 12.936(4)$ Å            | $\gamma = 94.252(13)^\circ$ .  |
| Volume                 | $1507.8(9)$ Å <sup>3</sup>   |                                |
| Z                      | 2                            |                                |
| Density (calculated)   | $1.514$ Mg/m <sup>3</sup>    |                                |
| Absorption coefficient | $1.270$ mm <sup>-1</sup>     |                                |
| F(000)                 | 688                          |                                |

|                                   |                                             |
|-----------------------------------|---------------------------------------------|
| Crystal size                      | 0.200 x 0.150 x 0.150 mm <sup>3</sup>       |
| Theta range for data collection   | 3.070 to 26.499°.                           |
| Index ranges                      | -13<=h<=13, -14<=k<=14, -16<=l<=16          |
| Reflections collected             | 48643                                       |
| Independent reflections           | 6188 [R(int) = 0.0493]                      |
| Completeness to theta = 25.242°   | 99.7 %                                      |
| Absorption correction             | Semi-empirical from equivalents             |
| Max. and min. transmission        | 0.7454 and 0.6303                           |
| Refinement method                 | Full-matrix least-squares on F <sup>2</sup> |
| Data / restraints / parameters    | 6188 / 0 / 375                              |
| Goodness-of-fit on F <sup>2</sup> | 1.063                                       |
| Final R indices [I>2sigma(I)]     | R1 = 0.0604, wR2 = 0.1315                   |
| R indices (all data)              | R1 = 0.0836, wR2 = 0.1482                   |
| Extinction coefficient            | 0.0203(13)                                  |
| Largest diff. peak and hole       | 2.290 and -1.667 e.Å <sup>-3</sup>          |

Table 2. Atomic coordinates ( x 10<sup>4</sup>) and equivalent isotropic displacement parameters (Å<sup>2</sup>x 10<sup>3</sup>) for am63. U(eq) is defined as one third of the trace of the orthogonalized U<sup>ij</sup> tensor.

|       | x       | y        | z       | U(eq) |
|-------|---------|----------|---------|-------|
| C(1)  | 3950(5) | 10691(5) | 7679(5) | 57(1) |
| C(2)  | 3606(6) | 11822(6) | 7663(6) | 71(2) |
| C(3)  | 4210(7) | 12388(6) | 7037(6) | 76(2) |
| C(4)  | 5171(6) | 11866(5) | 6436(5) | 67(2) |
| C(5)  | 5539(5) | 10748(5) | 6462(4) | 50(1) |
| C(6)  | 4923(5) | 10159(4) | 7073(4) | 46(1) |
| C(7)  | 5509(4) | 8996(4)  | 6955(4) | 42(1) |
| C(8)  | 6532(4) | 8946(5)  | 6227(4) | 48(1) |
| C(9)  | 6529(5) | 10005(5) | 5941(4) | 52(1) |
| C(10) | 7396(6) | 10204(6) | 5257(5) | 69(2) |
| C(11) | 8254(6) | 9348(8)  | 4860(6) | 77(2) |
| C(12) | 8256(6) | 8309(7)  | 5130(5) | 75(2) |
| C(13) | 7401(5) | 8096(6)  | 5817(5) | 60(1) |
| C(14) | 5120(4) | 8274(4)  | 7495(4) | 41(1) |
| C(15) | 5622(4) | 7122(4)  | 7575(4) | 38(1) |
| C(16) | 4760(4) | 6579(4)  | 8216(4) | 40(1) |
| C(17) | 3655(5) | 5933(5)  | 7692(5) | 55(1) |

|       |          |          |          |        |
|-------|----------|----------|----------|--------|
| C(18) | 2833(6)  | 5481(6)  | 8262(7)  | 75(2)  |
| C(19) | 3101(7)  | 5662(6)  | 9358(7)  | 75(2)  |
| C(20) | 4187(7)  | 6304(7)  | 9896(6)  | 75(2)  |
| C(21) | 5020(5)  | 6759(5)  | 9327(4)  | 56(1)  |
| C(22) | 7194(4)  | 5236(4)  | 7151(3)  | 36(1)  |
| C(23) | 7492(4)  | 6426(4)  | 8057(4)  | 35(1)  |
| C(24) | 8409(4)  | 6545(4)  | 8868(4)  | 42(1)  |
| C(25) | 9018(4)  | 5517(4)  | 8778(4)  | 44(1)  |
| C(26) | 8713(4)  | 4344(4)  | 7881(4)  | 40(1)  |
| C(27) | 7813(4)  | 4201(4)  | 7072(4)  | 39(1)  |
| C(28) | 7399(4)  | 8733(4)  | 8736(4)  | 39(1)  |
| C(29) | 6798(5)  | 9636(5)  | 9556(4)  | 49(1)  |
| C(30) | 7346(6)  | 10867(5) | 10098(5) | 60(1)  |
| C(31) | 8489(6)  | 11199(5) | 9870(5)  | 65(2)  |
| C(32) | 9092(5)  | 10296(5) | 9074(5)  | 59(1)  |
| C(33) | 8549(5)  | 9073(4)  | 8497(4)  | 46(1)  |
| C(34) | 6315(4)  | 5116(4)  | 6221(4)  | 40(1)  |
| C(35) | 8839(10) | 3245(12) | 4131(10) | 139(4) |
| N(1)  | 6864(3)  | 7449(3)  | 8129(3)  | 38(1)  |
| N(2)  | 5702(4)  | 6135(4)  | 6422(3)  | 42(1)  |
| O(1)  | 6213(3)  | 4179(3)  | 5305(3)  | 50(1)  |
| I(1)  | 9665(1)  | 2790(1)  | 7744(1)  | 75(1)  |
| Cl(1) | 8556(4)  | 1644(4)  | 3312(4)  | 195(2) |
| Cl(2) | 9678(4)  | 3980(4)  | 3480(3)  | 173(1) |

Table 3. Bond lengths [Å] and angles [°] for am63.

|           |           |
|-----------|-----------|
| C(1)-C(6) | 1.388(7)  |
| C(1)-C(2) | 1.394(8)  |
| C(1)-H(1) | 0.9300    |
| C(2)-C(3) | 1.389(10) |
| C(2)-H(2) | 0.9300    |
| C(3)-C(4) | 1.371(10) |
| C(3)-H(3) | 0.9300    |
| C(4)-C(5) | 1.394(7)  |
| C(4)-H(4) | 0.9300    |
| C(5)-C(6) | 1.398(7)  |
| C(5)-C(9) | 1.457(8)  |

|             |           |
|-------------|-----------|
| C(6)-C(7)   | 1.489(6)  |
| C(7)-C(14)  | 1.342(7)  |
| C(7)-C(8)   | 1.489(7)  |
| C(8)-C(13)  | 1.389(7)  |
| C(8)-C(9)   | 1.412(7)  |
| C(9)-C(10)  | 1.396(8)  |
| C(10)-C(11) | 1.381(10) |
| C(10)-H(10) | 0.9300    |
| C(11)-C(12) | 1.377(10) |
| C(11)-H(11) | 0.9300    |
| C(12)-C(13) | 1.396(8)  |
| C(12)-H(12) | 0.9300    |
| C(13)-H(13) | 0.9300    |
| C(14)-C(15) | 1.519(6)  |
| C(14)-H(14) | 0.9300    |
| C(15)-N(1)  | 1.479(6)  |
| C(15)-N(2)  | 1.480(6)  |
| C(15)-C(16) | 1.541(6)  |
| C(16)-C(21) | 1.384(7)  |
| C(16)-C(17) | 1.385(7)  |
| C(17)-C(18) | 1.389(8)  |
| C(17)-H(17) | 0.9300    |
| C(18)-C(19) | 1.366(10) |
| C(18)-H(18) | 0.9300    |
| C(19)-C(20) | 1.371(10) |
| C(19)-H(19) | 0.9300    |
| C(20)-C(21) | 1.398(8)  |
| C(20)-H(20) | 0.9300    |
| C(21)-H(21) | 0.9300    |
| C(22)-C(27) | 1.392(6)  |
| C(22)-C(23) | 1.408(6)  |
| C(22)-C(34) | 1.476(6)  |
| C(23)-N(1)  | 1.387(5)  |
| C(23)-C(24) | 1.395(6)  |
| C(24)-C(25) | 1.374(6)  |
| C(24)-H(24) | 0.9300    |
| C(25)-C(26) | 1.392(6)  |
| C(25)-H(25) | 0.9300    |

|                |           |
|----------------|-----------|
| C(26)-C(27)    | 1.372(6)  |
| C(26)-I(1)     | 2.098(4)  |
| C(27)-H(27)    | 0.9300    |
| C(28)-C(29)    | 1.385(6)  |
| C(28)-C(33)    | 1.388(7)  |
| C(28)-N(1)     | 1.439(5)  |
| C(29)-C(30)    | 1.387(7)  |
| C(29)-H(29)    | 0.9300    |
| C(30)-C(31)    | 1.372(8)  |
| C(30)-H(30)    | 0.9300    |
| C(31)-C(32)    | 1.372(8)  |
| C(31)-H(31)    | 0.9300    |
| C(32)-C(33)    | 1.381(7)  |
| C(32)-H(32)    | 0.9300    |
| C(33)-H(33)    | 0.9300    |
| C(34)-O(1)     | 1.237(5)  |
| C(34)-N(2)     | 1.341(6)  |
| C(35)-Cl(2)    | 1.675(10) |
| C(35)-Cl(1)    | 1.719(13) |
| C(35)-H(35A)   | 0.9700    |
| C(35)-H(35B)   | 0.9700    |
| N(2)-H(2A)     | 0.86(6)   |
|                |           |
| C(6)-C(1)-C(2) | 118.5(6)  |
| C(6)-C(1)-H(1) | 120.8     |
| C(2)-C(1)-H(1) | 120.8     |
| C(3)-C(2)-C(1) | 120.7(6)  |
| C(3)-C(2)-H(2) | 119.7     |
| C(1)-C(2)-H(2) | 119.7     |
| C(4)-C(3)-C(2) | 121.1(6)  |
| C(4)-C(3)-H(3) | 119.4     |
| C(2)-C(3)-H(3) | 119.4     |
| C(3)-C(4)-C(5) | 118.8(6)  |
| C(3)-C(4)-H(4) | 120.6     |
| C(5)-C(4)-H(4) | 120.6     |
| C(4)-C(5)-C(6) | 120.5(6)  |
| C(4)-C(5)-C(9) | 131.0(5)  |
| C(6)-C(5)-C(9) | 108.4(4)  |

|                   |          |
|-------------------|----------|
| C(1)-C(6)-C(5)    | 120.4(5) |
| C(1)-C(6)-C(7)    | 130.6(5) |
| C(5)-C(6)-C(7)    | 109.0(4) |
| C(14)-C(7)-C(8)   | 133.3(4) |
| C(14)-C(7)-C(6)   | 121.2(4) |
| C(8)-C(7)-C(6)    | 105.4(4) |
| C(13)-C(8)-C(9)   | 119.6(5) |
| C(13)-C(8)-C(7)   | 132.7(5) |
| C(9)-C(8)-C(7)    | 107.7(4) |
| C(10)-C(9)-C(8)   | 120.4(6) |
| C(10)-C(9)-C(5)   | 130.1(5) |
| C(8)-C(9)-C(5)    | 109.4(5) |
| C(11)-C(10)-C(9)  | 119.1(6) |
| C(11)-C(10)-H(10) | 120.5    |
| C(9)-C(10)-H(10)  | 120.5    |
| C(12)-C(11)-C(10) | 120.8(6) |
| C(12)-C(11)-H(11) | 119.6    |
| C(10)-C(11)-H(11) | 119.6    |
| C(11)-C(12)-C(13) | 121.0(6) |
| C(11)-C(12)-H(12) | 119.5    |
| C(13)-C(12)-H(12) | 119.5    |
| C(8)-C(13)-C(12)  | 119.1(6) |
| C(8)-C(13)-H(13)  | 120.4    |
| C(12)-C(13)-H(13) | 120.4    |
| C(7)-C(14)-C(15)  | 130.6(4) |
| C(7)-C(14)-H(14)  | 114.7    |
| C(15)-C(14)-H(14) | 114.7    |
| N(1)-C(15)-N(2)   | 107.0(3) |
| N(1)-C(15)-C(14)  | 111.1(4) |
| N(2)-C(15)-C(14)  | 109.3(3) |
| N(1)-C(15)-C(16)  | 111.3(4) |
| N(2)-C(15)-C(16)  | 108.7(4) |
| C(14)-C(15)-C(16) | 109.3(4) |
| C(21)-C(16)-C(17) | 117.8(5) |
| C(21)-C(16)-C(15) | 122.5(4) |
| C(17)-C(16)-C(15) | 119.6(4) |
| C(16)-C(17)-C(18) | 121.1(6) |
| C(16)-C(17)-H(17) | 119.4    |



|                   |          |
|-------------------|----------|
| C(18)-C(17)-H(17) | 119.4    |
| C(19)-C(18)-C(17) | 120.5(6) |
| C(19)-C(18)-H(18) | 119.7    |
| C(17)-C(18)-H(18) | 119.7    |
| C(18)-C(19)-C(20) | 119.4(6) |
| C(18)-C(19)-H(19) | 120.3    |
| C(20)-C(19)-H(19) | 120.3    |
| C(19)-C(20)-C(21) | 120.5(6) |
| C(19)-C(20)-H(20) | 119.8    |
| C(21)-C(20)-H(20) | 119.8    |
| C(16)-C(21)-C(20) | 120.7(6) |
| C(16)-C(21)-H(21) | 119.6    |
| C(20)-C(21)-H(21) | 119.6    |
| C(27)-C(22)-C(23) | 120.1(4) |
| C(27)-C(22)-C(34) | 119.7(4) |
| C(23)-C(22)-C(34) | 120.0(4) |
| N(1)-C(23)-C(24)  | 121.5(4) |
| N(1)-C(23)-C(22)  | 119.5(4) |
| C(24)-C(23)-C(22) | 119.0(4) |
| C(25)-C(24)-C(23) | 120.3(4) |
| C(25)-C(24)-H(24) | 119.8    |
| C(23)-C(24)-H(24) | 119.8    |
| C(24)-C(25)-C(26) | 120.2(4) |
| C(24)-C(25)-H(25) | 119.9    |
| C(26)-C(25)-H(25) | 119.9    |
| C(27)-C(26)-C(25) | 120.6(4) |
| C(27)-C(26)-I(1)  | 119.7(3) |
| C(25)-C(26)-I(1)  | 119.7(3) |
| C(26)-C(27)-C(22) | 119.8(4) |
| C(26)-C(27)-H(27) | 120.1    |
| C(22)-C(27)-H(27) | 120.1    |
| C(29)-C(28)-C(33) | 119.3(4) |
| C(29)-C(28)-N(1)  | 121.6(4) |
| C(33)-C(28)-N(1)  | 119.1(4) |
| C(28)-C(29)-C(30) | 119.2(5) |
| C(28)-C(29)-H(29) | 120.4    |
| C(30)-C(29)-H(29) | 120.4    |
| C(31)-C(30)-C(29) | 121.5(5) |

|                     |          |
|---------------------|----------|
| C(31)-C(30)-H(30)   | 119.3    |
| C(29)-C(30)-H(30)   | 119.3    |
| C(30)-C(31)-C(32)   | 119.1(5) |
| C(30)-C(31)-H(31)   | 120.4    |
| C(32)-C(31)-H(31)   | 120.4    |
| C(31)-C(32)-C(33)   | 120.4(5) |
| C(31)-C(32)-H(32)   | 119.8    |
| C(33)-C(32)-H(32)   | 119.8    |
| C(32)-C(33)-C(28)   | 120.4(5) |
| C(32)-C(33)-H(33)   | 119.8    |
| C(28)-C(33)-H(33)   | 119.8    |
| O(1)-C(34)-N(2)     | 122.9(4) |
| O(1)-C(34)-C(22)    | 122.3(4) |
| N(2)-C(34)-C(22)    | 114.7(4) |
| Cl(2)-C(35)-Cl(1)   | 111.6(7) |
| Cl(2)-C(35)-H(35A)  | 109.3    |
| Cl(1)-C(35)-H(35A)  | 109.3    |
| Cl(2)-C(35)-H(35B)  | 109.3    |
| Cl(1)-C(35)-H(35B)  | 109.3    |
| H(35A)-C(35)-H(35B) | 108.0    |
| C(23)-N(1)-C(28)    | 120.9(4) |
| C(23)-N(1)-C(15)    | 115.6(3) |
| C(28)-N(1)-C(15)    | 123.5(3) |
| C(34)-N(2)-C(15)    | 122.5(4) |
| C(34)-N(2)-H(2A)    | 115(4)   |
| C(15)-N(2)-H(2A)    | 119(4)   |

Symmetry transformations used to generate equivalent atoms:

Table 4. Anisotropic displacement parameters ( $\text{\AA}^2 \times 10^3$ ) for am63. The anisotropic displacement factor exponent takes the form:  $-2\pi^2 [ h^2 a^{*2} U^{11} + \dots + 2 h k a^* b^* U^{12} ]$

|      | $U^{11}$ | $U^{22}$ | $U^{33}$ | $U^{23}$ | $U^{13}$ | $U^{12}$ |
|------|----------|----------|----------|----------|----------|----------|
| C(1) | 65(3)    | 48(3)    | 55(3)    | 17(2)    | -1(3)    | 17(3)    |
| C(2) | 82(4)    | 51(3)    | 72(4)    | 14(3)    | -11(3)   | 25(3)    |
| C(3) | 105(5)   | 40(3)    | 81(4)    | 24(3)    | -23(4)   | 8(3)     |
| C(4) | 86(4)    | 41(3)    | 71(4)    | 25(3)    | -22(3)   | -10(3)   |

SUPPORTING INFORMATION FOR *New J. Chem*

|       |        |         |        |       |        |        |
|-------|--------|---------|--------|-------|--------|--------|
| C(5)  | 59(3)  | 42(3)   | 47(3)  | 18(2) | -16(2) | -7(2)  |
| C(6)  | 54(3)  | 41(2)   | 43(2)  | 16(2) | -9(2)  | 5(2)   |
| C(7)  | 44(3)  | 45(2)   | 38(2)  | 16(2) | -3(2)  | 8(2)   |
| C(8)  | 47(3)  | 57(3)   | 40(2)  | 22(2) | -4(2)  | 4(2)   |
| C(9)  | 55(3)  | 57(3)   | 44(3)  | 25(2) | -11(2) | -10(2) |
| C(10) | 79(4)  | 73(4)   | 57(3)  | 34(3) | -7(3)  | -20(3) |
| C(11) | 67(4)  | 101(5)  | 64(4)  | 37(4) | 10(3)  | -10(4) |
| C(12) | 60(4)  | 108(5)  | 66(4)  | 43(4) | 16(3)  | 19(4)  |
| C(13) | 54(3)  | 84(4)   | 56(3)  | 38(3) | 11(3)  | 19(3)  |
| C(14) | 41(2)  | 40(2)   | 42(2)  | 16(2) | 2(2)   | 10(2)  |
| C(15) | 41(2)  | 36(2)   | 35(2)  | 12(2) | -1(2)  | 10(2)  |
| C(16) | 41(2)  | 33(2)   | 46(2)  | 14(2) | 6(2)   | 9(2)   |
| C(17) | 52(3)  | 49(3)   | 60(3)  | 20(2) | 2(2)   | 1(2)   |
| C(18) | 62(4)  | 60(4)   | 98(5)  | 30(4) | 13(4)  | -7(3)  |
| C(19) | 80(5)  | 64(4)   | 95(5)  | 44(4) | 34(4)  | 9(3)   |
| C(20) | 92(5)  | 85(5)   | 65(4)  | 46(4) | 23(4)  | 14(4)  |
| C(21) | 61(3)  | 61(3)   | 48(3)  | 26(3) | 8(2)   | 7(3)   |
| C(22) | 37(2)  | 34(2)   | 34(2)  | 12(2) | -2(2)  | 3(2)   |
| C(23) | 38(2)  | 33(2)   | 37(2)  | 15(2) | 3(2)   | 6(2)   |
| C(24) | 50(3)  | 35(2)   | 37(2)  | 11(2) | -8(2)  | 3(2)   |
| C(25) | 47(3)  | 43(2)   | 42(2)  | 19(2) | -8(2)  | 5(2)   |
| C(26) | 47(3)  | 35(2)   | 44(2)  | 20(2) | -2(2)  | 10(2)  |
| C(27) | 42(2)  | 33(2)   | 38(2)  | 12(2) | -1(2)  | 6(2)   |
| C(28) | 46(3)  | 33(2)   | 36(2)  | 13(2) | 0(2)   | 4(2)   |
| C(29) | 52(3)  | 42(3)   | 48(3)  | 13(2) | 8(2)   | 7(2)   |
| C(30) | 76(4)  | 39(3)   | 56(3)  | 7(2)  | 11(3)  | 13(3)  |
| C(31) | 70(4)  | 37(3)   | 81(4)  | 18(3) | 0(3)   | -5(3)  |
| C(32) | 52(3)  | 48(3)   | 80(4)  | 29(3) | 10(3)  | 1(2)   |
| C(33) | 51(3)  | 40(2)   | 51(3)  | 21(2) | 9(2)   | 7(2)   |
| C(34) | 44(2)  | 38(2)   | 36(2)  | 12(2) | -1(2)  | 9(2)   |
| C(35) | 104(7) | 189(12) | 143(9) | 84(9) | 38(7)  | 23(8)  |
| N(1)  | 38(2)  | 32(2)   | 41(2)  | 10(2) | -4(2)  | 5(2)   |
| N(2)  | 47(2)  | 43(2)   | 32(2)  | 11(2) | -4(2)  | 13(2)  |
| O(1)  | 57(2)  | 47(2)   | 35(2)  | 3(1)  | -9(2)  | 17(2)  |
| I(1)  | 92(1)  | 53(1)   | 78(1)  | 22(1) | -19(1) | 28(1)  |
| Cl(1) | 195(4) | 200(4)  | 178(3) | 79(3) | 26(3)  | -65(3) |
| Cl(2) | 184(3) | 170(3)  | 184(3) | 90(3) | 71(3)  | -4(2)  |

Table 5. Hydrogen coordinates ( $\times 10^4$ ) and isotropic displacement parameters ( $\text{\AA}^2 \times 10^{-3}$ ) for am63.

|        | x        | y        | z        | U(eq)  |
|--------|----------|----------|----------|--------|
| H(1)   | 3536     | 10302    | 8086     | 68     |
| H(2)   | 2966     | 12201    | 8076     | 85     |
| H(3)   | 3958     | 13134    | 7025     | 91     |
| H(4)   | 5571     | 12251    | 6018     | 80     |
| H(10)  | 7396     | 10903    | 5070     | 83     |
| H(11)  | 8836     | 9475     | 4406     | 92     |
| H(12)  | 8837     | 7739     | 4849     | 90     |
| H(13)  | 7413     | 7394     | 5999     | 72     |
| H(14)  | 4429     | 8520     | 7884     | 49     |
| H(17)  | 3460     | 5800     | 6945     | 66     |
| H(18)  | 2095     | 5051     | 7894     | 90     |
| H(19)  | 2551     | 5353     | 9735     | 90     |
| H(20)  | 4371     | 6437     | 10644    | 90     |
| H(21)  | 5756     | 7188     | 9700     | 67     |
| H(24)  | 8610     | 7324     | 9474     | 51     |
| H(25)  | 9635     | 5606     | 9317     | 52     |
| H(27)  | 7617     | 3415     | 6474     | 46     |
| H(29)  | 6035     | 9419     | 9741     | 58     |
| H(30)  | 6930     | 11481    | 10627    | 73     |
| H(31)  | 8850     | 12025    | 10251    | 78     |
| H(32)  | 9871     | 10509    | 8921     | 71     |
| H(33)  | 8957     | 8474     | 7945     | 55     |
| H(35A) | 8076     | 3619     | 4298     | 166    |
| H(35B) | 9262     | 3370     | 4843     | 166    |
| H(2A)  | 5160(50) | 6060(50) | 5900(50) | 60(16) |

Table 6. Torsion angles [ $^\circ$ ] for am63.

|                     |          |
|---------------------|----------|
| C(6)-C(1)-C(2)-C(3) | 1.3(9)   |
| C(1)-C(2)-C(3)-C(4) | -1.2(10) |
| C(2)-C(3)-C(4)-C(5) | 0.0(9)   |
| C(3)-C(4)-C(5)-C(6) | 1.1(8)   |

|                         |           |
|-------------------------|-----------|
| C(3)-C(4)-C(5)-C(9)     | -178.3(5) |
| C(2)-C(1)-C(6)-C(5)     | -0.1(8)   |
| C(2)-C(1)-C(6)-C(7)     | 178.3(5)  |
| C(4)-C(5)-C(6)-C(1)     | -1.1(7)   |
| C(9)-C(5)-C(6)-C(1)     | 178.5(4)  |
| C(4)-C(5)-C(6)-C(7)     | -179.8(4) |
| C(9)-C(5)-C(6)-C(7)     | -0.3(5)   |
| C(1)-C(6)-C(7)-C(14)    | -0.9(8)   |
| C(5)-C(6)-C(7)-C(14)    | 177.6(4)  |
| C(1)-C(6)-C(7)-C(8)     | -178.2(5) |
| C(5)-C(6)-C(7)-C(8)     | 0.4(5)    |
| C(14)-C(7)-C(8)-C(13)   | 3.4(9)    |
| C(6)-C(7)-C(8)-C(13)    | -179.8(5) |
| C(14)-C(7)-C(8)-C(9)    | -177.1(5) |
| C(6)-C(7)-C(8)-C(9)     | -0.3(5)   |
| C(13)-C(8)-C(9)-C(10)   | -0.4(8)   |
| C(7)-C(8)-C(9)-C(10)    | -180.0(5) |
| C(13)-C(8)-C(9)-C(5)    | 179.7(5)  |
| C(7)-C(8)-C(9)-C(5)     | 0.1(5)    |
| C(4)-C(5)-C(9)-C(10)    | -0.3(9)   |
| C(6)-C(5)-C(9)-C(10)    | -179.8(5) |
| C(4)-C(5)-C(9)-C(8)     | 179.6(5)  |
| C(6)-C(5)-C(9)-C(8)     | 0.1(5)    |
| C(8)-C(9)-C(10)-C(11)   | 0.2(8)    |
| C(5)-C(9)-C(10)-C(11)   | -179.9(5) |
| C(9)-C(10)-C(11)-C(12)  | 0.2(10)   |
| C(10)-C(11)-C(12)-C(13) | -0.6(10)  |
| C(9)-C(8)-C(13)-C(12)   | 0.0(8)    |
| C(7)-C(8)-C(13)-C(12)   | 179.5(5)  |
| C(11)-C(12)-C(13)-C(8)  | 0.4(10)   |
| C(8)-C(7)-C(14)-C(15)   | 1.5(9)    |
| C(6)-C(7)-C(14)-C(15)   | -174.9(4) |
| C(7)-C(14)-C(15)-N(1)   | 61.8(6)   |
| C(7)-C(14)-C(15)-N(2)   | -56.1(6)  |
| C(7)-C(14)-C(15)-C(16)  | -175.0(5) |
| N(1)-C(15)-C(16)-C(21)  | 18.9(6)   |
| N(2)-C(15)-C(16)-C(21)  | 136.5(4)  |
| C(14)-C(15)-C(16)-C(21) | -104.2(5) |

|                         |           |
|-------------------------|-----------|
| N(1)-C(15)-C(16)-C(17)  | -164.1(4) |
| N(2)-C(15)-C(16)-C(17)  | -46.5(5)  |
| C(14)-C(15)-C(16)-C(17) | 72.8(5)   |
| C(21)-C(16)-C(17)-C(18) | 0.0(8)    |
| C(15)-C(16)-C(17)-C(18) | -177.1(5) |
| C(16)-C(17)-C(18)-C(19) | -0.2(9)   |
| C(17)-C(18)-C(19)-C(20) | 0.4(10)   |
| C(18)-C(19)-C(20)-C(21) | -0.6(10)  |
| C(17)-C(16)-C(21)-C(20) | -0.1(8)   |
| C(15)-C(16)-C(21)-C(20) | 176.9(5)  |
| C(19)-C(20)-C(21)-C(16) | 0.4(9)    |
| C(27)-C(22)-C(23)-N(1)  | -179.6(4) |
| C(34)-C(22)-C(23)-N(1)  | 6.7(6)    |
| C(27)-C(22)-C(23)-C(24) | -0.1(7)   |
| C(34)-C(22)-C(23)-C(24) | -173.8(4) |
| N(1)-C(23)-C(24)-C(25)  | 180.0(4)  |
| C(22)-C(23)-C(24)-C(25) | 0.5(7)    |
| C(23)-C(24)-C(25)-C(26) | -0.8(7)   |
| C(24)-C(25)-C(26)-C(27) | 0.7(7)    |
| C(24)-C(25)-C(26)-I(1)  | 179.3(4)  |
| C(25)-C(26)-C(27)-C(22) | -0.3(7)   |
| I(1)-C(26)-C(27)-C(22)  | -178.9(3) |
| C(23)-C(22)-C(27)-C(26) | 0.0(7)    |
| C(34)-C(22)-C(27)-C(26) | 173.7(4)  |
| C(33)-C(28)-C(29)-C(30) | 1.7(7)    |
| N(1)-C(28)-C(29)-C(30)  | -178.6(5) |
| C(28)-C(29)-C(30)-C(31) | -2.5(9)   |
| C(29)-C(30)-C(31)-C(32) | 1.2(9)    |
| C(30)-C(31)-C(32)-C(33) | 0.9(9)    |
| C(31)-C(32)-C(33)-C(28) | -1.7(8)   |
| C(29)-C(28)-C(33)-C(32) | 0.4(7)    |
| N(1)-C(28)-C(33)-C(32)  | -179.4(4) |
| C(27)-C(22)-C(34)-O(1)  | -9.4(7)   |
| C(23)-C(22)-C(34)-O(1)  | 164.3(5)  |
| C(27)-C(22)-C(34)-N(2)  | 175.0(4)  |
| C(23)-C(22)-C(34)-N(2)  | -11.3(6)  |
| C(24)-C(23)-N(1)-C(28)  | 24.7(6)   |
| C(22)-C(23)-N(1)-C(28)  | -155.8(4) |

|                        |           |
|------------------------|-----------|
| C(24)-C(23)-N(1)-C(15) | -153.7(4) |
| C(22)-C(23)-N(1)-C(15) | 25.8(6)   |
| C(29)-C(28)-N(1)-C(23) | -128.5(5) |
| C(33)-C(28)-N(1)-C(23) | 51.2(6)   |
| C(29)-C(28)-N(1)-C(15) | 49.8(6)   |
| C(33)-C(28)-N(1)-C(15) | -130.5(5) |
| N(2)-C(15)-N(1)-C(23)  | -49.1(5)  |
| C(14)-C(15)-N(1)-C(23) | -168.4(4) |
| C(16)-C(15)-N(1)-C(23) | 69.6(5)   |
| N(2)-C(15)-N(1)-C(28)  | 132.5(4)  |
| C(14)-C(15)-N(1)-C(28) | 13.3(6)   |
| C(16)-C(15)-N(1)-C(28) | -108.8(4) |
| O(1)-C(34)-N(2)-C(15)  | 166.6(5)  |
| C(22)-C(34)-N(2)-C(15) | -17.8(6)  |
| N(1)-C(15)-N(2)-C(34)  | 47.0(6)   |
| C(14)-C(15)-N(2)-C(34) | 167.4(4)  |
| C(16)-C(15)-N(2)-C(34) | -73.3(5)  |

---

Symmetry transformations used to generate equivalent atoms:

Table 7. Hydrogen bonds for am63 [ $\text{\AA}$  and  $^\circ$ ].

| D-H...A             | d(D-H)  | d(H...A) | d(D...A)  | $\angle(\text{DHA})$ |
|---------------------|---------|----------|-----------|----------------------|
| C(35)-H(35A)...O(1) | 0.97    | 2.47     | 3.376(11) | 156.0                |
| N(2)-H(2A)...O(1)#1 | 0.86(6) | 2.06(6)  | 2.922(5)  | 176(5)               |

Symmetry transformations used to generate equivalent atoms:

#1  $-x+1, -y+1, -z+1$

### Basic crystallographic data for compound 4b

Table 1. Crystal data and structure refinement for 4b.

|                                         |                                                                                           |                                                                            |
|-----------------------------------------|-------------------------------------------------------------------------------------------|----------------------------------------------------------------------------|
|                                         | shelx                                                                                     |                                                                            |
| Empirical formula                       | $\text{C}_{43}\text{H}_{33}\text{BrN}_2\text{O}$                                          |                                                                            |
| Formula weight                          | 672.177                                                                                   |                                                                            |
| Temperature                             | 296(2) K                                                                                  |                                                                            |
| Wavelength                              | 1.54178 $\text{\AA}$                                                                      |                                                                            |
| Crystal system                          | Monoclinic                                                                                |                                                                            |
| Space group                             | P 21/n                                                                                    |                                                                            |
| Unit cell dimensions                    | $a = 13.7423(4) \text{\AA}$<br>$b = 18.5947(6) \text{\AA}$<br>$c = 15.4410(5) \text{\AA}$ | $\alpha = 90^\circ$<br>$\beta = 108.1530(10)^\circ$<br>$\gamma = 90^\circ$ |
| Volume                                  | 3749.3(2) $\text{\AA}^3$                                                                  |                                                                            |
| Z                                       | 4                                                                                         |                                                                            |
| Density (calculated)                    | 1.269 $\text{Mg/m}^3$                                                                     |                                                                            |
| Absorption coefficient                  | 2.414 $\text{mm}^{-1}$                                                                    |                                                                            |
| F(000)                                  | 1476                                                                                      |                                                                            |
| Crystal size                            | 0.150 x 0.120 x 0.100 $\text{mm}^3$                                                       |                                                                            |
| Theta range for data collection         | 3.765 to 65.997 $^\circ$ .                                                                |                                                                            |
| Index ranges                            | $-16 \leq h \leq 16, -22 \leq k \leq 21, -18 \leq l \leq 18$                              |                                                                            |
| Reflections collected                   | 72176                                                                                     |                                                                            |
| Independent reflections                 | 6524 [R(int) = 0.0692]                                                                    |                                                                            |
| Completeness to theta = 65.997 $^\circ$ | 99.8 %                                                                                    |                                                                            |
| Absorption correction                   | Semi-empirical from equivalents                                                           |                                                                            |
| Max. and min. transmission              | 0.7531 and 0.3833                                                                         |                                                                            |
| Refinement method                       | Full-matrix least-squares on $F^2$                                                        |                                                                            |
| Data / restraints / parameters          | 6524 / 345 / 548                                                                          |                                                                            |
| Goodness-of-fit on $F^2$                | 1.044                                                                                     |                                                                            |



Final R indices [ $I > 2\sigma(I)$ ] R1 = 0.0700, wR2 = 0.2117

R indices (all data) R1 = 0.0890, wR2 = 0.2428

Extinction coefficient 0.0023(4)

Largest diff. peak and hole 0.456 and -0.557 e. $\text{\AA}^{-3}$ Table 2. Atomic coordinates ( $\times 10^4$ ) and equivalent isotropic displacement parameters ( $\text{\AA}^2 \times 10^3$ ) for am3142. U(eq) is defined as one third of the trace of the orthogonalized  $U^{ij}$  tensor.

|        | x        | y        | z         | U(eq)  |
|--------|----------|----------|-----------|--------|
| C(1)   | 2556(3)  | 6237(2)  | 4103(2)   | 82(1)  |
| C(2)   | 3508(3)  | 6344(2)  | 4002(2)   | 87(1)  |
| C(3)   | 3623(4)  | 6331(2)  | 3141(3)   | 101(1) |
| C(4)   | 2788(5)  | 6192(3)  | 2377(3)   | 117(2) |
| C(5)   | 1834(4)  | 6067(2)  | 2467(3)   | 111(2) |
| C(6)   | 1716(3)  | 6083(2)  | 3318(3)   | 93(1)  |
| C(7)   | 807(3)   | 5977(2)  | 3605(3)   | 102(1) |
| C(8)   | -208(5)  | 5805(3)  | 3101(5)   | 138(2) |
| C(9)   | -909(4)  | 5725(3)  | 3586(7)   | 160(3) |
| C(10)  | -640(4)  | 5836(3)  | 4512(6)   | 144(2) |
| C(11)  | 346(4)   | 6005(3)  | 4997(4)   | 118(2) |
| C(12)  | 1071(3)  | 6078(2)  | 4543(3)   | 94(1)  |
| C(13)  | 2174(3)  | 6255(2)  | 4900(2)   | 81(1)  |
| C(14)  | 2618(3)  | 6421(2)  | 5776(2)   | 85(1)  |
| C(15)  | 4118(3)  | 5281(2)  | 6343(2)   | 75(1)  |
| C(16)  | 3728(3)  | 4848(2)  | 5603(2)   | 88(1)  |
| C(17)  | 3479(3)  | 4139(2)  | 5714(3)   | 103(1) |
| C(18)  | 3633(3)  | 3846(2)  | 6567(4)   | 104(1) |
| C(19)  | 4042(3)  | 4294(2)  | 7309(3)   | 102(1) |
| C(20)  | 4283(3)  | 5001(2)  | 7199(2)   | 90(1)  |
| C(21)  | 3377(6)  | 3071(3)  | 6699(5)   | 157(2) |
| C(22)  | 3860(20) | 6759(13) | 7327(8)   | 85(3)  |
| C(23)  | 3310(19) | 6399(13) | 7819(13)  | 103(4) |
| C(24)  | 3527(18) | 6470(11) | 8762(13)  | 106(4) |
| C(25)  | 4272(17) | 6901(10) | 9245(10)  | 100(3) |
| C(26)  | 4885(18) | 7227(11) | 8788(12)  | 100(3) |
| C(27)  | 4681(17) | 7154(14) | 7850(13)  | 92(3)  |
| C(28)  | 4480(20) | 6972(11) | 10266(10) | 129(5) |
| C(22') | 3830(40) | 6670(20) | 7337(13)  | 89(5)  |

|        |          |          |           |         |
|--------|----------|----------|-----------|---------|
| C(23') | 3130(30) | 6300(19) | 7664(17)  | 91(4)   |
| C(24') | 3220(20) | 6377(16) | 8580(17)  | 99(4)   |
| C(25') | 3980(30) | 6766(17) | 9182(17)  | 101(5)  |
| C(26') | 4570(30) | 7207(18) | 8830(20)  | 104(5)  |
| C(27') | 4470(30) | 7170(20) | 7900(20)  | 95(5)   |
| C(28') | 4030(30) | 6810(20) | 10172(19) | 144(8)  |
| C(29)  | 5446(3)  | 6154(2)  | 6421(2)   | 78(1)   |
| C(30)  | 6202(3)  | 5623(2)  | 6691(2)   | 86(1)   |
| C(31)  | 7223(3)  | 5790(2)  | 6871(3)   | 97(1)   |
| C(32)  | 7518(3)  | 6491(2)  | 6778(3)   | 96(1)   |
| C(33)  | 6797(3)  | 7018(2)  | 6492(3)   | 93(1)   |
| C(34)  | 5772(3)  | 6858(2)  | 6310(2)   | 82(1)   |
| C(35)  | 5005(3)  | 7425(2)  | 5976(2)   | 89(1)   |
| C(36)  | 3272(3)  | 7835(2)  | 5581(2)   | 84(1)   |
| C(37)  | 2911(4)  | 8221(2)  | 6173(3)   | 108(1)  |
| C(38)  | 2254(4)  | 8793(3)  | 5856(3)   | 119(2)  |
| C(39)  | 1935(4)  | 8991(2)  | 4957(3)   | 107(1)  |
| C(40)  | 2313(4)  | 8605(2)  | 4380(3)   | 111(1)  |
| C(41)  | 2974(4)  | 8032(2)  | 4674(3)   | 100(1)  |
| C(42)  | 1226(5)  | 9623(3)  | 4635(4)   | 147(2)  |
| N(1)   | 4410(2)  | 6011(1)  | 6209(2)   | 78(1)   |
| C(43)  | 3718(3)  | 6608(2)  | 6310(2)   | 81(1)   |
| N(2)   | 4016(2)  | 7267(1)  | 5900(2)   | 81(1)   |
| O(1)   | 5247(2)  | 8021(2)  | 5740(2)   | 112(1)  |
| Br(1)  | 8933(1)  | 6707(1)  | 7043(1)   | 145(1)  |
| C(44)  | 5372(19) | 9152(11) | 4440(20)  | 176(10) |
| Cl(1)  | 6045(15) | 9871(9)  | 4660(16)  | 309(8)  |
| Cl(2)  | 6132(17) | 8534(11) | 4327(15)  | 324(9)  |
| C(44') | 5950(30) | 9340(30) | 3993(18)  | 237(14) |
| Cl(1') | 5080(20) | 9767(15) | 4270(20)  | 455(16) |
| Cl(2') | 6608(9)  | 8926(12) | 4981(7)   | 272(8)  |

Table 3. Bond lengths [ $\text{\AA}$ ] and angles [ $^\circ$ ] for 4b.

|            |          |
|------------|----------|
| C(1)-C(2)  | 1.380(6) |
| C(1)-C(6)  | 1.418(5) |
| C(1)-C(13) | 1.481(5) |
| C(2)-C(3)  | 1.386(5) |
| C(2)-H(2)  | 0.9300   |

|              |           |
|--------------|-----------|
| C(3)-C(4)    | 1.390(7)  |
| C(3)-H(3)    | 0.9300    |
| C(4)-C(5)    | 1.380(7)  |
| C(4)-H(4)    | 0.9300    |
| C(5)-C(6)    | 1.375(6)  |
| C(5)-H(5)    | 0.9300    |
| C(6)-C(7)    | 1.462(6)  |
| C(7)-C(12)   | 1.393(6)  |
| C(7)-C(8)    | 1.406(7)  |
| C(8)-C(9)    | 1.400(10) |
| C(8)-H(8)    | 0.9300    |
| C(9)-C(10)   | 1.377(10) |
| C(9)-H(9)    | 0.9300    |
| C(10)-C(11)  | 1.366(8)  |
| C(10)-H(10)  | 0.9300    |
| C(11)-C(12)  | 1.392(6)  |
| C(11)-H(11)  | 0.9300    |
| C(12)-C(13)  | 1.479(5)  |
| C(13)-C(14)  | 1.336(5)  |
| C(14)-C(43)  | 1.519(5)  |
| C(14)-H(14)  | 0.9300    |
| C(15)-C(16)  | 1.364(5)  |
| C(15)-C(20)  | 1.374(5)  |
| C(15)-N(1)   | 1.447(4)  |
| C(16)-C(17)  | 1.387(5)  |
| C(16)-H(16)  | 0.9300    |
| C(17)-C(18)  | 1.379(7)  |
| C(17)-H(17)  | 0.9300    |
| C(18)-C(19)  | 1.386(7)  |
| C(18)-C(21)  | 1.513(6)  |
| C(19)-C(20)  | 1.379(6)  |
| C(19)-H(19)  | 0.9300    |
| C(20)-H(20)  | 0.9300    |
| C(21)-H(21A) | 0.9600    |
| C(21)-H(21B) | 0.9600    |
| C(21)-H(21C) | 0.9600    |
| C(22)-C(27)  | 1.380(14) |
| C(22)-C(23)  | 1.394(13) |

|               |           |
|---------------|-----------|
| C(22)-C(43)   | 1.548(10) |
| C(23)-C(24)   | 1.399(13) |
| C(23)-H(23)   | 0.9300    |
| C(24)-C(25)   | 1.331(13) |
| C(24)-H(24)   | 0.9300    |
| C(25)-C(26)   | 1.395(13) |
| C(25)-C(28)   | 1.518(12) |
| C(26)-C(27)   | 1.393(13) |
| C(26)-H(26)   | 0.9300    |
| C(27)-H(27)   | 0.9300    |
| C(28)-H(28A)  | 0.9600    |
| C(28)-H(28B)  | 0.9600    |
| C(28)-H(28C)  | 0.9600    |
| C(22')-C(27') | 1.384(18) |
| C(22')-C(23') | 1.401(18) |
| C(22')-C(43)  | 1.549(14) |
| C(23')-C(24') | 1.389(17) |
| C(23')-H(23') | 0.9300    |
| C(24')-C(25') | 1.374(16) |
| C(24')-H(24') | 0.9300    |
| C(25')-C(26') | 1.380(18) |
| C(25')-C(28') | 1.510(18) |
| C(26')-C(27') | 1.392(18) |
| C(26')-H(26') | 0.9300    |
| C(27')-H(27') | 0.9300    |
| C(28')-H(28D) | 0.9600    |
| C(28')-H(28E) | 0.9600    |
| C(28')-H(28F) | 0.9600    |
| C(29)-N(1)    | 1.383(5)  |
| C(29)-C(30)   | 1.399(5)  |
| C(29)-C(34)   | 1.412(5)  |
| C(30)-C(31)   | 1.378(6)  |
| C(30)-H(30)   | 0.9300    |
| C(31)-C(32)   | 1.386(6)  |
| C(31)-H(31)   | 0.9300    |
| C(32)-C(33)   | 1.366(6)  |
| C(32)-Br(1)   | 1.901(4)  |
| C(33)-C(34)   | 1.380(6)  |

|                 |           |
|-----------------|-----------|
| C(33)-H(33)     | 0.9300    |
| C(34)-C(35)     | 1.466(5)  |
| C(35)-O(1)      | 1.243(4)  |
| C(35)-N(2)      | 1.360(5)  |
| C(36)-C(37)     | 1.371(6)  |
| C(36)-C(41)     | 1.380(5)  |
| C(36)-N(2)      | 1.446(5)  |
| C(37)-C(38)     | 1.383(6)  |
| C(37)-H(37)     | 0.9300    |
| C(38)-C(39)     | 1.369(6)  |
| C(38)-H(38)     | 0.9300    |
| C(39)-C(40)     | 1.367(7)  |
| C(39)-C(42)     | 1.508(6)  |
| C(40)-C(41)     | 1.382(6)  |
| C(40)-H(40)     | 0.9300    |
| C(41)-H(41)     | 0.9300    |
| C(42)-H(42A)    | 0.9600    |
| C(42)-H(42B)    | 0.9600    |
| C(42)-H(42C)    | 0.9600    |
| N(1)-C(43)      | 1.502(5)  |
| C(43)-N(2)      | 1.493(4)  |
| C(44)-Cl(2)     | 1.597(19) |
| C(44)-Cl(1)     | 1.600(18) |
| C(44)-H(44A)    | 0.9700    |
| C(44)-H(44B)    | 0.9700    |
| C(44')-Cl(1')   | 1.60(2)   |
| C(44')-Cl(2')   | 1.69(2)   |
| C(44')-H(44C)   | 0.9700    |
| C(44')-H(44D)   | 0.9700    |
|                 |           |
| C(2)-C(1)-C(6)  | 118.8(4)  |
| C(2)-C(1)-C(13) | 133.2(3)  |
| C(6)-C(1)-C(13) | 108.0(4)  |
| C(1)-C(2)-C(3)  | 120.0(4)  |
| C(1)-C(2)-H(2)  | 120.0     |
| C(3)-C(2)-H(2)  | 120.0     |
| C(2)-C(3)-C(4)  | 120.5(5)  |
| C(2)-C(3)-H(3)  | 119.7     |

|                   |          |
|-------------------|----------|
| C(4)-C(3)-H(3)    | 119.8    |
| C(5)-C(4)-C(3)    | 120.3(4) |
| C(5)-C(4)-H(4)    | 119.9    |
| C(3)-C(4)-H(4)    | 119.9    |
| C(6)-C(5)-C(4)    | 119.5(4) |
| C(6)-C(5)-H(5)    | 120.3    |
| C(4)-C(5)-H(5)    | 120.3    |
| C(5)-C(6)-C(1)    | 120.9(4) |
| C(5)-C(6)-C(7)    | 130.8(4) |
| C(1)-C(6)-C(7)    | 108.2(4) |
| C(12)-C(7)-C(8)   | 119.9(5) |
| C(12)-C(7)-C(6)   | 109.1(3) |
| C(8)-C(7)-C(6)    | 131.1(5) |
| C(9)-C(8)-C(7)    | 117.3(6) |
| C(9)-C(8)-H(8)    | 121.4    |
| C(7)-C(8)-H(8)    | 121.4    |
| C(10)-C(9)-C(8)   | 122.2(5) |
| C(10)-C(9)-H(9)   | 118.9    |
| C(8)-C(9)-H(9)    | 118.9    |
| C(11)-C(10)-C(9)  | 120.2(7) |
| C(11)-C(10)-H(10) | 119.9    |
| C(9)-C(10)-H(10)  | 119.9    |
| C(10)-C(11)-C(12) | 119.4(6) |
| C(10)-C(11)-H(11) | 120.3    |
| C(12)-C(11)-H(11) | 120.3    |
| C(11)-C(12)-C(7)  | 121.0(4) |
| C(11)-C(12)-C(13) | 130.2(4) |
| C(7)-C(12)-C(13)  | 108.8(4) |
| C(14)-C(13)-C(12) | 121.3(4) |
| C(14)-C(13)-C(1)  | 132.8(3) |
| C(12)-C(13)-C(1)  | 105.8(3) |
| C(13)-C(14)-C(43) | 131.7(4) |
| C(13)-C(14)-H(14) | 114.2    |
| C(43)-C(14)-H(14) | 114.2    |
| C(16)-C(15)-C(20) | 119.1(3) |
| C(16)-C(15)-N(1)  | 119.2(3) |
| C(20)-C(15)-N(1)  | 121.6(3) |
| C(15)-C(16)-C(17) | 120.4(4) |

|                     |           |
|---------------------|-----------|
| C(15)-C(16)-H(16)   | 119.8     |
| C(17)-C(16)-H(16)   | 119.8     |
| C(18)-C(17)-C(16)   | 121.6(4)  |
| C(18)-C(17)-H(17)   | 119.2     |
| C(16)-C(17)-H(17)   | 119.2     |
| C(17)-C(18)-C(19)   | 117.1(4)  |
| C(17)-C(18)-C(21)   | 122.1(5)  |
| C(19)-C(18)-C(21)   | 120.8(5)  |
| C(20)-C(19)-C(18)   | 121.4(4)  |
| C(20)-C(19)-H(19)   | 119.3     |
| C(18)-C(19)-H(19)   | 119.3     |
| C(15)-C(20)-C(19)   | 120.5(4)  |
| C(15)-C(20)-H(20)   | 119.8     |
| C(19)-C(20)-H(20)   | 119.8     |
| C(18)-C(21)-H(21A)  | 109.5     |
| C(18)-C(21)-H(21B)  | 109.5     |
| H(21A)-C(21)-H(21B) | 109.5     |
| C(18)-C(21)-H(21C)  | 109.5     |
| H(21A)-C(21)-H(21C) | 109.5     |
| H(21B)-C(21)-H(21C) | 109.5     |
| C(27)-C(22)-C(23)   | 114.8(14) |
| C(27)-C(22)-C(43)   | 120.7(16) |
| C(23)-C(22)-C(43)   | 123.3(14) |
| C(22)-C(23)-C(24)   | 123.1(12) |
| C(22)-C(23)-H(23)   | 118.5     |
| C(24)-C(23)-H(23)   | 118.5     |
| C(25)-C(24)-C(23)   | 121.2(13) |
| C(25)-C(24)-H(24)   | 119.4     |
| C(23)-C(24)-H(24)   | 119.4     |
| C(24)-C(25)-C(26)   | 117.3(13) |
| C(24)-C(25)-C(28)   | 119.8(12) |
| C(26)-C(25)-C(28)   | 122.8(12) |
| C(27)-C(26)-C(25)   | 121.7(15) |
| C(27)-C(26)-H(26)   | 119.1     |
| C(25)-C(26)-H(26)   | 119.1     |
| C(22)-C(27)-C(26)   | 121.5(17) |
| C(22)-C(27)-H(27)   | 119.2     |
| C(26)-C(27)-H(27)   | 119.2     |

|                      |          |
|----------------------|----------|
| C(25)-C(28)-H(28A)   | 109.5    |
| C(25)-C(28)-H(28B)   | 109.5    |
| H(28A)-C(28)-H(28B)  | 109.5    |
| C(25)-C(28)-H(28C)   | 109.5    |
| H(28A)-C(28)-H(28C)  | 109.5    |
| H(28B)-C(28)-H(28C)  | 109.5    |
| C(27')-C(22')-C(23') | 118(2)   |
| C(27')-C(22')-C(43)  | 123(2)   |
| C(23')-C(22')-C(43)  | 118(2)   |
| C(24')-C(23')-C(22') | 118(2)   |
| C(24')-C(23')-H(23') | 121.1    |
| C(22')-C(23')-H(23') | 121.1    |
| C(25')-C(24')-C(23') | 123(2)   |
| C(25')-C(24')-H(24') | 118.4    |
| C(23')-C(24')-H(24') | 118.4    |
| C(24')-C(25')-C(26') | 118(2)   |
| C(24')-C(25')-C(28') | 120(2)   |
| C(26')-C(25')-C(28') | 122(2)   |
| C(25')-C(26')-C(27') | 119(3)   |
| C(25')-C(26')-H(26') | 120.4    |
| C(27')-C(26')-H(26') | 120.4    |
| C(22')-C(27')-C(26') | 122(3)   |
| C(22')-C(27')-H(27') | 119.1    |
| C(26')-C(27')-H(27') | 119.1    |
| C(25')-C(28')-H(28D) | 109.5    |
| C(25')-C(28')-H(28E) | 109.5    |
| H(28D)-C(28')-H(28E) | 109.5    |
| C(25')-C(28')-H(28F) | 109.5    |
| H(28D)-C(28')-H(28F) | 109.5    |
| H(28E)-C(28')-H(28F) | 109.5    |
| N(1)-C(29)-C(30)     | 123.3(3) |
| N(1)-C(29)-C(34)     | 119.4(3) |
| C(30)-C(29)-C(34)    | 117.1(4) |
| C(31)-C(30)-C(29)    | 121.1(4) |
| C(31)-C(30)-H(30)    | 119.4    |
| C(29)-C(30)-H(30)    | 119.4    |
| C(30)-C(31)-C(32)    | 120.2(4) |
| C(30)-C(31)-H(31)    | 119.9    |



|                     |          |
|---------------------|----------|
| C(32)-C(31)-H(31)   | 119.9    |
| C(33)-C(32)-C(31)   | 120.1(4) |
| C(33)-C(32)-Br(1)   | 120.6(3) |
| C(31)-C(32)-Br(1)   | 119.3(3) |
| C(32)-C(33)-C(34)   | 120.2(4) |
| C(32)-C(33)-H(33)   | 119.9    |
| C(34)-C(33)-H(33)   | 119.9    |
| C(33)-C(34)-C(29)   | 121.2(4) |
| C(33)-C(34)-C(35)   | 119.5(3) |
| C(29)-C(34)-C(35)   | 119.3(4) |
| O(1)-C(35)-N(2)     | 121.3(4) |
| O(1)-C(35)-C(34)    | 121.0(4) |
| N(2)-C(35)-C(34)    | 117.6(3) |
| C(37)-C(36)-C(41)   | 118.9(4) |
| C(37)-C(36)-N(2)    | 121.3(3) |
| C(41)-C(36)-N(2)    | 119.6(3) |
| C(36)-C(37)-C(38)   | 119.8(4) |
| C(36)-C(37)-H(37)   | 120.1    |
| C(38)-C(37)-H(37)   | 120.1    |
| C(39)-C(38)-C(37)   | 122.3(4) |
| C(39)-C(38)-H(38)   | 118.8    |
| C(37)-C(38)-H(38)   | 118.8    |
| C(40)-C(39)-C(38)   | 116.8(4) |
| C(40)-C(39)-C(42)   | 122.2(4) |
| C(38)-C(39)-C(42)   | 121.0(5) |
| C(39)-C(40)-C(41)   | 122.4(4) |
| C(39)-C(40)-H(40)   | 118.8    |
| C(41)-C(40)-H(40)   | 118.8    |
| C(36)-C(41)-C(40)   | 119.6(4) |
| C(36)-C(41)-H(41)   | 120.2    |
| C(40)-C(41)-H(41)   | 120.2    |
| C(39)-C(42)-H(42A)  | 109.5    |
| C(39)-C(42)-H(42B)  | 109.5    |
| H(42A)-C(42)-H(42B) | 109.5    |
| C(39)-C(42)-H(42C)  | 109.5    |
| H(42A)-C(42)-H(42C) | 109.5    |
| H(42B)-C(42)-H(42C) | 109.5    |
| C(29)-N(1)-C(15)    | 117.2(3) |

|                      |           |
|----------------------|-----------|
| C(29)-N(1)-C(43)     | 118.1(3)  |
| C(15)-N(1)-C(43)     | 117.7(3)  |
| N(2)-C(43)-N(1)      | 107.2(3)  |
| N(2)-C(43)-C(14)     | 108.4(3)  |
| N(1)-C(43)-C(14)     | 109.3(3)  |
| N(2)-C(43)-C(22)     | 108.6(8)  |
| N(1)-C(43)-C(22)     | 110.9(12) |
| C(14)-C(43)-C(22)    | 112.3(11) |
| N(2)-C(43)-C(22')    | 114.9(14) |
| N(1)-C(43)-C(22')    | 107(2)    |
| C(14)-C(43)-C(22')   | 109.8(17) |
| C(35)-N(2)-C(36)     | 116.9(3)  |
| C(35)-N(2)-C(43)     | 122.7(3)  |
| C(36)-N(2)-C(43)     | 119.0(3)  |
| Cl(2)-C(44)-Cl(1)    | 105.7(15) |
| Cl(2)-C(44)-H(44A)   | 110.6     |
| Cl(1)-C(44)-H(44A)   | 110.6     |
| Cl(2)-C(44)-H(44B)   | 110.6     |
| Cl(1)-C(44)-H(44B)   | 110.6     |
| H(44A)-C(44)-H(44B)  | 108.7     |
| Cl(1')-C(44')-Cl(2') | 102.4(15) |
| Cl(1')-C(44')-H(44C) | 111.3     |
| Cl(2')-C(44')-H(44C) | 111.3     |
| Cl(1')-C(44')-H(44D) | 111.3     |
| Cl(2')-C(44')-H(44D) | 111.3     |
| H(44C)-C(44')-H(44D) | 109.2     |

---

Symmetry transformations used to generate equivalent atoms:

Table 4. Anisotropic displacement parameters ( $\text{\AA}^2 \times 10^3$ ) for am3142. The anisotropic displacement factor exponent takes the form:  $-2\pi^2 [ h^2 a^* U^{11} + \dots + 2 h k a^* b^* U^{12} ]$

|      | $U^{11}$ | $U^{22}$ | $U^{33}$ | $U^{23}$ | $U^{13}$ | $U^{12}$ |
|------|----------|----------|----------|----------|----------|----------|
| C(1) | 90(2)    | 64(2)    | 79(2)    | -1(1)    | 8(2)     | 5(2)     |
| C(2) | 96(2)    | 78(2)    | 81(2)    | -2(2)    | 18(2)    | 10(2)    |
| C(3) | 120(3)   | 89(3)    | 94(3)    | 7(2)     | 34(2)    | 23(2)    |
| C(4) | 153(5)   | 106(3)   | 82(3)    | 11(2)    | 23(3)    | 41(3)    |

SUPPORTING INFORMATION FOR *New J. Chem*

|        |         |         |         |         |        |        |
|--------|---------|---------|---------|---------|--------|--------|
| C(5)   | 128(4)  | 94(3)   | 85(3)   | -2(2)   | -6(2)  | 26(3)  |
| C(6)   | 102(3)  | 71(2)   | 85(2)   | -1(2)   | 0(2)   | 16(2)  |
| C(7)   | 88(3)   | 74(2)   | 122(3)  | -3(2)   | -1(2)  | 7(2)   |
| C(8)   | 103(4)  | 113(4)  | 158(5)  | -17(3)  | -18(3) | 8(3)   |
| C(9)   | 79(3)   | 121(4)  | 247(9)  | -13(5)  | 2(4)   | -11(3) |
| C(10)  | 91(3)   | 120(4)  | 207(7)  | 17(4)   | 27(4)  | -12(3) |
| C(11)  | 93(3)   | 105(3)  | 152(4)  | 18(3)   | 32(3)  | 1(2)   |
| C(12)  | 83(2)   | 74(2)   | 113(3)  | 4(2)    | 12(2)  | 2(2)   |
| C(13)  | 83(2)   | 66(2)   | 86(2)   | 2(2)    | 15(2)  | 3(2)   |
| C(14)  | 92(2)   | 76(2)   | 86(2)   | 1(2)    | 28(2)  | 6(2)   |
| C(15)  | 84(2)   | 63(2)   | 72(2)   | -1(1)   | 16(2)  | 0(1)   |
| C(16)  | 103(2)  | 71(2)   | 79(2)   | -6(2)   | 12(2)  | 3(2)   |
| C(17)  | 103(3)  | 73(2)   | 115(3)  | -14(2)  | 6(2)   | -7(2)  |
| C(18)  | 92(3)   | 76(2)   | 144(4)  | 8(2)    | 36(3)  | -5(2)  |
| C(19)  | 115(3)  | 90(3)   | 107(3)  | 23(2)   | 43(2)  | 7(2)   |
| C(20)  | 108(3)  | 80(2)   | 78(2)   | 2(2)    | 21(2)  | 6(2)   |
| C(21)  | 166(6)  | 79(3)   | 230(7)  | 25(4)   | 67(5)  | -14(3) |
| C(22)  | 116(5)  | 60(6)   | 75(5)   | 5(4)    | 23(4)  | 11(5)  |
| C(23)  | 136(8)  | 84(6)   | 84(7)   | -10(5)  | 27(6)  | -2(5)  |
| C(24)  | 145(9)  | 94(6)   | 76(6)   | 7(5)    | 29(6)  | -2(7)  |
| C(25)  | 143(9)  | 80(6)   | 74(5)   | 0(4)    | 31(5)  | 4(6)   |
| C(26)  | 137(9)  | 83(4)   | 76(4)   | -2(3)   | 25(5)  | 7(6)   |
| C(27)  | 124(8)  | 77(5)   | 72(4)   | -7(4)   | 24(4)  | 12(6)  |
| C(28)  | 182(14) | 132(10) | 69(5)   | -9(5)   | 35(7)  | -11(9) |
| C(22') | 123(8)  | 65(8)   | 73(7)   | -7(6)   | 23(7)  | 4(7)   |
| C(23') | 129(9)  | 77(8)   | 68(7)   | -2(6)   | 35(7)  | -4(7)  |
| C(24') | 140(10) | 86(7)   | 70(8)   | -4(6)   | 32(7)  | -6(7)  |
| C(25') | 138(11) | 79(8)   | 77(7)   | -2(6)   | 19(7)  | -6(8)  |
| C(26') | 141(10) | 83(6)   | 81(6)   | -14(6)  | 23(8)  | 8(8)   |
| C(27') | 128(10) | 71(6)   | 79(7)   | 4(6)    | 23(7)  | 13(8)  |
| C(28') | 190(20) | 131(16) | 106(11) | -18(10) | 32(13) | 6(15)  |
| C(29)  | 96(2)   | 65(2)   | 68(2)   | -4(1)   | 18(2)  | -2(2)  |
| C(30)  | 98(2)   | 66(2)   | 90(2)   | -3(2)   | 21(2)  | 0(2)   |
| C(31)  | 104(3)  | 84(2)   | 100(3)  | 1(2)    | 28(2)  | 13(2)  |
| C(32)  | 93(2)   | 88(2)   | 102(3)  | -3(2)   | 24(2)  | -5(2)  |
| C(33)  | 102(3)  | 74(2)   | 96(2)   | -3(2)   | 21(2)  | -8(2)  |
| C(34)  | 95(2)   | 67(2)   | 78(2)   | -2(2)   | 16(2)  | -3(2)  |
| C(35)  | 108(3)  | 68(2)   | 79(2)   | 0(2)    | 13(2)  | -2(2)  |

|        |         |         |         |         |         |          |
|--------|---------|---------|---------|---------|---------|----------|
| C(36)  | 99(2)   | 66(2)   | 78(2)   | 2(2)    | 13(2)   | 5(2)     |
| C(37)  | 144(4)  | 98(3)   | 80(2)   | 12(2)   | 35(2)   | 29(3)    |
| C(38)  | 138(4)  | 109(3)  | 112(3)  | 7(3)    | 42(3)   | 36(3)    |
| C(39)  | 115(3)  | 86(3)   | 106(3)  | 9(2)    | 14(2)   | 17(2)    |
| C(40)  | 141(4)  | 89(3)   | 82(2)   | 11(2)   | 6(2)    | 18(3)    |
| C(41)  | 135(3)  | 79(2)   | 77(2)   | 2(2)    | 20(2)   | 18(2)    |
| C(42)  | 153(5)  | 116(4)  | 146(4)  | 17(3)   | 11(4)   | 47(4)    |
| N(1)   | 89(2)   | 62(1)   | 76(2)   | -3(1)   | 16(1)   | 0(1)     |
| C(43)  | 99(2)   | 66(2)   | 75(2)   | 4(1)    | 21(2)   | 5(2)     |
| N(2)   | 95(2)   | 65(2)   | 75(2)   | 2(1)    | 15(1)   | 3(1)     |
| O(1)   | 113(2)  | 75(2)   | 130(2)  | 18(2)   | 13(2)   | -11(2)   |
| Br(1)  | 99(1)   | 129(1)  | 200(1)  | 13(1)   | 37(1)   | -7(1)    |
| C(44)  | 151(17) | 165(19) | 204(19) | 63(16)  | 44(16)  | -14(16)  |
| Cl(1)  | 270(16) | 244(13) | 410(20) | 6(14)   | 101(15) | -123(13) |
| Cl(2)  | 280(17) | 450(20) | 289(17) | -2(18)  | 158(15) | -59(18)  |
| C(44') | 148(19) | 240(20) | 290(20) | -20(20) | 30(19)  | -40(20)  |
| Cl(1') | 410(30) | 340(30) | 510(30) | 90(30)  | 0(30)   | -60(20)  |
| Cl(2') | 199(9)  | 480(20) | 139(6)  | 32(10)  | 52(6)   | -87(12)  |

Table 5.

Hydrogen coordinates ( $\times 10^4$ ) and isotropic displacement parameters ( $\text{\AA}^2 \times 10^3$ ) for am3142.

|       | x     | y    | z    | U(eq) |
|-------|-------|------|------|-------|
| H(2)  | 4074  | 6426 | 4511 | 104   |
| H(3)  | 4263  | 6416 | 3074 | 121   |
| H(4)  | 2873  | 6183 | 1802 | 141   |
| H(5)  | 1277  | 5972 | 1955 | 134   |
| H(8)  | -405  | 5746 | 2472 | 166   |
| H(9)  | -1579 | 5594 | 3271 | 192   |
| H(10) | -1132 | 5795 | 4809 | 173   |
| H(11) | 532   | 6070 | 5625 | 141   |
| H(14) | 2173  | 6422 | 6123 | 102   |
| H(16) | 3629  | 5030 | 5021 | 106   |
| H(17) | 3201  | 3854 | 5202 | 124   |
| H(19) | 4156  | 4113 | 7894 | 122   |
| H(20) | 4558  | 5289 | 7709 | 109   |

|        |      |      |       |     |
|--------|------|------|-------|-----|
| H(21A) | 3780 | 2912 | 7294  | 235 |
| H(21B) | 3526 | 2776 | 6245  | 235 |
| H(21C) | 2663 | 3032 | 6641  | 235 |
| H(23)  | 2775 | 6099 | 7505  | 123 |
| H(24)  | 3144 | 6211 | 9056  | 128 |
| H(26)  | 5444 | 7501 | 9118  | 121 |
| H(27)  | 5111 | 7376 | 7570  | 111 |
| H(28A) | 3847 | 7067 | 10389 | 193 |
| H(28B) | 4947 | 7361 | 10495 | 193 |
| H(28C) | 4770 | 6532 | 10561 | 193 |
| H(23') | 2621 | 6013 | 7281  | 109 |
| H(24') | 2732 | 6154 | 8796  | 119 |
| H(26') | 5038 | 7525 | 9205  | 125 |
| H(27') | 4831 | 7488 | 7660  | 114 |
| H(28D) | 4418 | 6404 | 10495 | 217 |
| H(28E) | 3353 | 6794 | 10217 | 217 |
| H(28F) | 4364 | 7246 | 10432 | 217 |
| H(30)  | 6013 | 5150 | 6750  | 104 |
| H(31)  | 7715 | 5431 | 7055  | 116 |
| H(33)  | 6997 | 7486 | 6419  | 111 |
| H(37)  | 3109 | 8098 | 6787  | 129 |
| H(38)  | 2021 | 9052 | 6267  | 143 |
| H(40)  | 2119 | 8732 | 3768  | 133 |
| H(41)  | 3217 | 7780 | 4263  | 120 |
| H(42A) | 1536 | 9962 | 4333  | 220 |
| H(42B) | 1100 | 9850 | 5149  | 220 |
| H(42C) | 589  | 9459 | 4218  | 220 |
| H(44A) | 5096 | 9039 | 4926  | 211 |
| H(44B) | 4807 | 9208 | 3876  | 211 |
| H(44C) | 6388 | 9662 | 3790  | 284 |
| H(44D) | 5654 | 8989 | 3516  | 284 |

Table 6.

Torsion angles [°] for am3142.

|                      |           |
|----------------------|-----------|
| C(6)-C(1)-C(2)-C(3)  | 2.6(5)    |
| C(13)-C(1)-C(2)-C(3) | -176.3(4) |
| C(1)-C(2)-C(3)-C(4)  | -1.6(6)   |
| C(2)-C(3)-C(4)-C(5)  | 0.1(7)    |

|                         |           |
|-------------------------|-----------|
| C(3)-C(4)-C(5)-C(6)     | 0.2(7)    |
| C(4)-C(5)-C(6)-C(1)     | 0.9(6)    |
| C(4)-C(5)-C(6)-C(7)     | 179.5(4)  |
| C(2)-C(1)-C(6)-C(5)     | -2.3(5)   |
| C(13)-C(1)-C(6)-C(5)    | 176.9(3)  |
| C(2)-C(1)-C(6)-C(7)     | 178.8(3)  |
| C(13)-C(1)-C(6)-C(7)    | -2.0(4)   |
| C(5)-C(6)-C(7)-C(12)    | -177.5(4) |
| C(1)-C(6)-C(7)-C(12)    | 1.3(4)    |
| C(5)-C(6)-C(7)-C(8)     | 2.3(8)    |
| C(1)-C(6)-C(7)-C(8)     | -178.9(4) |
| C(12)-C(7)-C(8)-C(9)    | -1.5(7)   |
| C(6)-C(7)-C(8)-C(9)     | 178.8(5)  |
| C(7)-C(8)-C(9)-C(10)    | 2.4(9)    |
| C(8)-C(9)-C(10)-C(11)   | -2.3(10)  |
| C(9)-C(10)-C(11)-C(12)  | 1.3(9)    |
| C(10)-C(11)-C(12)-C(7)  | -0.5(7)   |
| C(10)-C(11)-C(12)-C(13) | -180.0(4) |
| C(8)-C(7)-C(12)-C(11)   | 0.6(6)    |
| C(6)-C(7)-C(12)-C(11)   | -179.6(4) |
| C(8)-C(7)-C(12)-C(13)   | -179.8(4) |
| C(6)-C(7)-C(12)-C(13)   | 0.0(4)    |
| C(11)-C(12)-C(13)-C(14) | -4.4(6)   |
| C(7)-C(12)-C(13)-C(14)  | 176.0(3)  |
| C(11)-C(12)-C(13)-C(1)  | 178.3(4)  |
| C(7)-C(12)-C(13)-C(1)   | -1.2(4)   |
| C(2)-C(1)-C(13)-C(14)   | 4.2(7)    |
| C(6)-C(1)-C(13)-C(14)   | -174.8(4) |
| C(2)-C(1)-C(13)-C(12)   | -179.0(4) |
| C(6)-C(1)-C(13)-C(12)   | 2.0(4)    |
| C(12)-C(13)-C(14)-C(43) | 178.9(3)  |
| C(1)-C(13)-C(14)-C(43)  | -4.8(7)   |
| C(20)-C(15)-C(16)-C(17) | 1.5(6)    |
| N(1)-C(15)-C(16)-C(17)  | 177.5(4)  |
| C(15)-C(16)-C(17)-C(18) | -1.3(7)   |
| C(16)-C(17)-C(18)-C(19) | 0.5(7)    |
| C(16)-C(17)-C(18)-C(21) | -179.2(5) |
| C(17)-C(18)-C(19)-C(20) | 0.0(7)    |

|                         |            |
|-------------------------|------------|
| C(21)-C(18)-C(19)-C(20) | 179.8(5)   |
| C(16)-C(15)-C(20)-C(19) | -1.0(6)    |
| N(1)-C(15)-C(20)-C(19)  | -176.9(4)  |
| C(18)-C(19)-C(20)-C(15) | 0.2(7)     |
| C(27)-C(22)-C(23)-C(24) | 4(4)       |
| C(43)-C(22)-C(23)-C(24) | 172(2)     |
| C(22)-C(23)-C(24)-C(25) | 1(3)       |
| C(23)-C(24)-C(25)-C(26) | -6(2)      |
| C(23)-C(24)-C(25)-C(28) | 179.2(18)  |
| C(24)-C(25)-C(26)-C(27) | 5(2)       |
| C(28)-C(25)-C(26)-C(27) | 179.9(18)  |
| C(23)-C(22)-C(27)-C(26) | -5(4)      |
| C(43)-C(22)-C(27)-C(26) | -172.7(18) |
| C(25)-C(26)-C(27)-C(22) | 0(3)       |
| C(27)-C(22)-C(23)-C(24) | -10(6)     |
| C(43)-C(22)-C(23)-C(24) | -178(3)    |
| C(22)-C(23)-C(24)-C(25) | -3(4)      |
| C(23)-C(24)-C(25)-C(26) | 12(4)      |
| C(23)-C(24)-C(25)-C(28) | -178(3)    |
| C(24)-C(25)-C(26)-C(27) | -9(4)      |
| C(28)-C(25)-C(26)-C(27) | -177(3)    |
| C(23)-C(22)-C(27)-C(26) | 14(6)      |
| C(43)-C(22)-C(27)-C(26) | -179(3)    |
| C(25)-C(26)-C(27)-C(22) | -4(5)      |
| N(1)-C(29)-C(30)-C(31)  | 178.1(3)   |
| C(34)-C(29)-C(30)-C(31) | 2.3(5)     |
| C(29)-C(30)-C(31)-C(32) | -0.6(6)    |
| C(30)-C(31)-C(32)-C(33) | -1.2(6)    |
| C(30)-C(31)-C(32)-Br(1) | 179.3(3)   |
| C(31)-C(32)-C(33)-C(34) | 1.2(6)     |
| Br(1)-C(32)-C(33)-C(34) | -179.3(3)  |
| C(32)-C(33)-C(34)-C(29) | 0.5(6)     |
| C(32)-C(33)-C(34)-C(35) | -178.1(4)  |
| N(1)-C(29)-C(34)-C(33)  | -178.3(3)  |
| C(30)-C(29)-C(34)-C(33) | -2.2(5)    |
| N(1)-C(29)-C(34)-C(35)  | 0.3(5)     |
| C(30)-C(29)-C(34)-C(35) | 176.4(3)   |
| C(33)-C(34)-C(35)-O(1)  | 9.5(6)     |

|                          |            |
|--------------------------|------------|
| C(29)-C(34)-C(35)-O(1)   | -169.1(4)  |
| C(33)-C(34)-C(35)-N(2)   | -173.0(3)  |
| C(29)-C(34)-C(35)-N(2)   | 8.4(5)     |
| C(41)-C(36)-C(37)-C(38)  | 0.5(7)     |
| N(2)-C(36)-C(37)-C(38)   | 175.6(5)   |
| C(36)-C(37)-C(38)-C(39)  | 0.5(9)     |
| C(37)-C(38)-C(39)-C(40)  | -1.3(8)    |
| C(37)-C(38)-C(39)-C(42)  | -179.4(6)  |
| C(38)-C(39)-C(40)-C(41)  | 1.1(8)     |
| C(42)-C(39)-C(40)-C(41)  | 179.1(5)   |
| C(37)-C(36)-C(41)-C(40)  | -0.7(7)    |
| N(2)-C(36)-C(41)-C(40)   | -175.9(4)  |
| C(39)-C(40)-C(41)-C(36)  | -0.1(8)    |
| C(30)-C(29)-N(1)-C(15)   | 4.7(5)     |
| C(34)-C(29)-N(1)-C(15)   | -179.5(3)  |
| C(30)-C(29)-N(1)-C(43)   | 154.9(3)   |
| C(34)-C(29)-N(1)-C(43)   | -29.3(4)   |
| C(16)-C(15)-N(1)-C(29)   | -104.6(4)  |
| C(20)-C(15)-N(1)-C(29)   | 71.3(4)    |
| C(16)-C(15)-N(1)-C(43)   | 105.0(4)   |
| C(20)-C(15)-N(1)-C(43)   | -79.1(4)   |
| C(29)-N(1)-C(43)-N(2)    | 45.1(4)    |
| C(15)-N(1)-C(43)-N(2)    | -164.9(3)  |
| C(29)-N(1)-C(43)-C(14)   | 162.4(3)   |
| C(15)-N(1)-C(43)-C(14)   | -47.5(4)   |
| C(29)-N(1)-C(43)-C(22)   | -73.3(10)  |
| C(15)-N(1)-C(43)-C(22)   | 76.8(10)   |
| C(29)-N(1)-C(43)-C(22')  | -78.8(14)  |
| C(15)-N(1)-C(43)-C(22')  | 71.3(14)   |
| C(13)-C(14)-C(43)-N(2)   | 60.2(5)    |
| C(13)-C(14)-C(43)-N(1)   | -56.3(5)   |
| C(13)-C(14)-C(43)-C(22)  | -179.8(11) |
| C(13)-C(14)-C(43)-C(22') | -173.5(19) |
| C(27)-C(22)-C(43)-N(2)   | -39(3)     |
| C(23)-C(22)-C(43)-N(2)   | 154(2)     |
| C(27)-C(22)-C(43)-N(1)   | 79(3)      |
| C(23)-C(22)-C(43)-N(1)   | -88(3)     |
| C(27)-C(22)-C(43)-C(14)  | -159(2)    |



|                           |           |
|---------------------------|-----------|
| C(23)-C(22)-C(43)-C(14)   | 35(3)     |
| C(27')-C(22')-C(43)-N(2)  | -21(6)    |
| C(23')-C(22')-C(43)-N(2)  | 146(3)    |
| C(27')-C(22')-C(43)-N(1)  | 98(5)     |
| C(23')-C(22')-C(43)-N(1)  | -95(4)    |
| C(27')-C(22')-C(43)-C(14) | -144(4)   |
| C(23')-C(22')-C(43)-C(14) | 24(4)     |
| O(1)-C(35)-N(2)-C(36)     | -3.3(5)   |
| C(34)-C(35)-N(2)-C(36)    | 179.2(3)  |
| O(1)-C(35)-N(2)-C(43)     | -169.9(3) |
| C(34)-C(35)-N(2)-C(43)    | 12.6(5)   |
| C(37)-C(36)-N(2)-C(35)    | -101.6(5) |
| C(41)-C(36)-N(2)-C(35)    | 73.4(5)   |
| C(37)-C(36)-N(2)-C(43)    | 65.5(5)   |
| C(41)-C(36)-N(2)-C(43)    | -119.5(4) |
| N(1)-C(43)-N(2)-C(35)     | -37.3(4)  |
| C(14)-C(43)-N(2)-C(35)    | -155.2(3) |
| C(22)-C(43)-N(2)-C(35)    | 82.6(13)  |
| C(22')-C(43)-N(2)-C(35)   | 82(2)     |
| N(1)-C(43)-N(2)-C(36)     | 156.4(3)  |
| C(14)-C(43)-N(2)-C(36)    | 38.5(4)   |
| C(22)-C(43)-N(2)-C(36)    | -83.8(13) |
| C(22')-C(43)-N(2)-C(36)   | -85(2)    |

---

Symmetry transformations used to generate equivalent atoms:
